# Supplementary material for: Organic solar powered greenhouse performance optimization and global economic opportunity
Source: Royal Society of Chemistry journal article supplement (doi:10.1039/d1ee03474j), 2022-01-01
Supplement: d1ee03474j1.zip [file d1ee03474j1.zip]

## Sheet: Sheet1
Date	Time (mins)	Ambient temperature (oC)	Ambient relative humidity (%)	Wind velocity (m/s)	Tiltangle of roof (degrees)	Wavelength (nm)	Refractive index of glass	Extinction coefficient of glass	Refractive index of ITO	Extinction coefficient of ITO	Refractive index of ZnO	Extinction coefficient of ZnO	Refractive index of PTB7TH:IEICO4F	Extinction coefficient of PTB7TH:IEICO4F	Refractive index of MoO3	Extinction coefficient ofMoO3	refractive index of LiF	extinction coefficient of LiF	nMoO3_bragg	kMoO3_bragg	Monthly average diffuse radiation (kWh/m2-day)	Monthly average total radiation (kWh/m2-day)	Fraction of light in each wavelength of AM 1.5 spectrum
2015-01-01 00:51:00	51	-6.1	92	2.1	27	300	1.42	0	2.25571	0.13412	1.469	0.005	1.60004	0.050793	2.45842	0.459192	1.40838	0	2.45842	0	0.31	0.43	2.25905e-06
2015-01-01 01:51:00	111	-6.7	92	2.6	27	305	1.42	0	2.2358	0.11136	1.4725	0.0055	1.6091	0.0506204	2.45176	0.413789	1.40766	0	2.45176	0	0.31	0.43	4.60824e-06
2015-01-01 02:51:00	171	-6.1	92	3.6	27	310	1.42	0	2.21857	0.0919958	1.476	0.006	1.61325	0.0505219	2.44682	0.387661	1.40694	0	2.44682	0	0.31	0.43	7.18439e-06
2015-01-01 03:51:00	231	-7.2	92	2.1	27	315	1.42	0	2.20134	0.072632	1.481	0.006	1.61511	0.0505885	2.46001	0.357055	1.40629	0	2.46001	0	0.31	0.43	1.60282e-05
2015-01-01 04:51:00	291	-7.2	92	2.1	27	320	1.42	0	2.18115	0.0628025	1.486	0.006	1.61575	0.0509487	2.46293	0.302574	1.40564	0	2.46293	0	0.31	0.43	2.13621e-05
2015-01-01 05:51:00	351	-7.8	92	2.1	27	325	1.42	0	2.16075	0.0530234	1.4925	0.0065	1.61599	0.0520754	2.43132	0.250223	1.40506	0	2.43132	0	0.31	0.43	3.50818e-05
2015-01-01 06:51:00	411	-8.3	88	1.5	27	330	1.42	0	2.14393	0.0432442	1.499	0.007	1.6163	0.0539312	2.38275	0.22907	1.40447	0	2.38275	0	0.31	0.43	3.9572e-05
2015-01-01 07:51:00	471	-7.8	88	2.1	27	335	1.42	0	2.12806	0.0355197	1.5035	0.007	1.61702	0.0563021	2.34393	0.238119	1.40394	0	2.34393	0	0.31	0.43	6.33033e-05
2015-01-01 08:51:00	531	-8.9	88	2.6	27	340	1.42	0	2.11292	0.0305797	1.508	0.007	1.6185	0.0589986	2.3293	0.259715	1.40341	0	2.3293	0	0.31	0.43	7.90413e-05
2015-01-01 09:51:00	591	-9.4	88	2.1	27	345	1.42	0	2.09818	0.0256397	1.5155	0.0075	1.6205	0.0616824	2.33055	0.279906	1.40293	0	2.33055	0	0.31	0.43	8.36013e-05
2015-01-01 10:51:00	651	-10	84	1.5	27	350	1.42	0	2.08583	0.0206997	1.523	0.008	1.62245	0.0634277	2.34716	0.299796	1.40245	0	2.34716	0	0.31	0.43	0.000116147
2015-01-01 11:51:00	711	-10	88	1.5	27	355	1.42	0	2.07584	0.0170857	1.544	0.009	1.62405	0.064276	2.38422	0.308816	1.402	0	2.38422	0	0.31	0.43	0.000166527
2015-01-01 12:51:00	771	-10	84	1.5	27	360	1.42	0	2.06586	0.0147844	1.565	0.01	1.62515	0.0644412	2.43229	0.290529	1.40156	0	2.43229	0	0.31	0.43	0.000191812
2015-01-01 13:51:00	831	-9.4	84	1.5	27	365	1.42	0	2.05408	0.0124832	1.596	0.0095	1.62556	0.0640238	2.4678	0.241265	1.40116	0	2.4678	0	0.31	0.43	0.000214288
2015-01-01 14:51:00	891	-10.6	88	2.1	27	370	1.42	0	2.0419	0.010182	1.627	0.009	1.62538	0.0632562	2.47023	0.180966	1.40076	0	2.47023	0	0.31	0.43	0.000249577
2015-01-01 15:51:00	951	-11.1	84	1	27	375	1.42	0	2.02973	0.00788079	1.6205	0.0075	1.6249	0.0625838	2.45006	0.138037	1.40039	0	2.45006	0	0.31	0.43	0.000253905
2015-01-01 16:51:00	1011	-12.2	88	1	27	380	1.42	0	2.01887	0.00557958	1.614	0.006	1.62411	0.0619764	2.42744	0.109455	1.40002	0	2.42744	0	0.31	0.43	0.00027306
2015-01-01 17:51:00	1071	-12.8	87	0	27	385	1.42	0	2.0098	0.00443661	1.593	0.006	1.62298	0.0612553	2.40606	0.0886044	1.39967	0	2.40606	0	0.31	0.43	0.000353022
2015-01-01 18:51:00	1131	-13.9	83	0	27	390	1.42	0	2.00072	0.00399303	1.572	0.006	1.62148	0.060503	2.38587	0.0727694	1.39933	0	2.38587	0	0.31	0.43	0.00036082
2015-01-01 19:51:00	1191	-12.2	84	0	27	395	1.42	0	1.99202	0.00354945	1.5645	0.006	1.61959	0.0596836	2.3668	0.0608452	1.39902	0	2.3668	0	0.31	0.43	0.000399449
2015-01-01 20:51:00	1251	-12.8	87	0	27	400	1.42	0	1.98476	0.00310587	1.557	0.006	1.61726	0.0588538	2.34926	0.0522934	1.3987	0	2.34926	0	0.31	0.43	0.000449237
2015-01-01 21:51:00	1311	-14.4	80	0	27	405	1.42	0	1.97749	0.00312677	1.5535	0.006	1.61453	0.0580413	2.33464	0.0464045	1.39841	0	2.33464	0	0.31	0.43	0.000487279
2015-01-01 22:51:00	1371	-14.4	69	0	27	410	1.42	0	1.96892	0.00401025	1.55	0.006	1.61138	0.0573692	2.32162	0.0413416	1.39812	0	2.32162	0	0.31	0.43	0.00043787
2015-01-01 23:51:00	1431	-14.4	76	1.5	27	415	1.42	0	1.9592	0.00489374	1.5485	0.006	1.60777	0.0567576	2.3099	0.0367122	1.39784	0	2.3099	0	0.31	0.43	0.000459558
01/02 01:00:00	51	-15	66	0	27	420	1.42	0	1.94959	0.00577722	1.547	0.006	1.60372	0.0563339	2.2993	0.0322301	1.39757	0	2.2993	0	0.31	0.43	0.00055699
01/02 02:00:00	111	-14.4	73	1	27	425	1.42	0	1.94398	0.00666071	1.5465	0.006	1.59924	0.0561412	2.28914	0.0282628	1.39732	0	2.28914	0	0.31	0.43	0.000601582
01/02 03:00:00	171	-16.1	76	0	27	430	1.42	0	1.93837	0.00639524	1.546	0.006	1.59433	0.056265	2.27923	0.0248025	1.39707	0	2.27923	0	0.31	0.43	0.000786175
01/02 04:00:00	231	-15.6	76	1.5	27	435	1.42	0	1.93275	0.00600214	1.5465	0.0065	1.58899	0.0567002	2.26953	0.0218303	1.39683	0	2.26953	0	0.31	0.43	0.000780482
01/02 05:00:00	291	-15.6	79	0	27	440	1.42	0	1.9255	0.00560904	1.547	0.007	1.58334	0.0576438	2.26083	0.0197689	1.3966	0	2.26083	0	0.31	0.43	0.000720742
01/02 06:00:00	351	-15.6	79	0	27	445	1.42	0	1.91823	0.00521594	1.5475	0.007	1.57742	0.0591142	2.25262	0.0179756	1.39638	0	2.25262	0	0.31	0.43	0.000888593
01/02 07:00:00	411	-15.6	76	0	27	450	1.42	0	1.91148	0.00488979	1.548	0.007	1.5713	0.061183	2.24502	0.0165164	1.39616	0	2.24502	0	0.31	0.43	0.000896829
01/02 08:00:00	471	-16.7	76	1.5	27	455	1.42	0	1.90587	0.00522138	1.549	0.007	1.5651	0.0638936	2.23805	0.0154187	1.39595	0	2.23805	0	0.31	0.43	0.000818343
01/02 09:00:00	531	-15	57	0	27	460	1.42	0	1.90025	0.00555296	1.55	0.007	1.55908	0.067398	2.23134	0.0144408	1.39574	0	2.23134	0	0.31	0.43	0.000872928
01/02 10:00:00	591	-15	80	1.5	27	465	1.42	0	1.89431	0.00588455	1.5515	0.007	1.55335	0.0717028	2.22524	0.0137014	1.39555	0	2.22524	0	0.31	0.43	0.000834298
01/02 11:00:00	651	-14.4	83	1.5	27	470	1.42	0	1.8875	0.00621613	1.553	0.007	1.54796	0.0765999	2.2195	0.0130231	1.39536	0	2.2195	0	0.31	0.43	0.000857611
01/02 12:00:00	711	-13.3	66	1	27	475	1.42	0	1.88068	0.00654772	1.5545	0.0075	1.54304	0.0820276	2.21423	0.0124267	1.39517	0	2.21423	0	0.31	0.43	0.000914399
01/02 13:00:00	771	-12.8	84	0	27	480	1.42	0	1.87458	0.00689635	1.556	0.008	1.53873	0.0880206	2.20923	0.0119168	1.39499	0	2.20923	0	0.31	0.43	0.00079506
01/02 14:00:00	831	-13.9	83	1.5	27	485	1.42	0	1.86946	0.00765944	1.5575	0.008	1.53497	0.0942973	2.20438	0.0114583	1.39482	0	2.20438	0	0.31	0.43	0.000772105
01/02 15:00:00	891	-12.2	88	4.6	27	490	1.42	0	1.86435	0.00842253	1.559	0.008	1.53176	0.10061	2.19993	0.0110091	1.39465	0	2.19993	0	0.31	0.43	0.000886848
01/02 16:00:00	951	-12.8	84	1.5	27	495	1.42	0	1.85919	0.00918562	1.5595	0.008	1.52908	0.106951	2.1956	0.010563	1.39449	0	2.1956	0	0.31	0.43	0.000935339
01/02 17:00:00	1011	-13.9	80	1.5	27	500	1.42	0	1.85399	0.00994871	1.56	0.008	1.52657	0.112944	2.19167	0.010219	1.39433	0	2.19167	0	0.31	0.43	0.000999656
01/02 18:00:00	1071	-12.8	100	1.5	27	505	1.42	0	1.8488	0.0107118	1.5605	0.008	1.52378	0.118225	2.18784	0.0098985	1.39417	0	2.18784	0	0.31	0.43	0.000938062
01/02 19:00:00	1131	-14.4	66	0	27	510	1.42	0	1.8436	0.0102521	1.561	0.008	1.52041	0.122918	2.18429	0.00958575	1.39402	0	2.18429	0	0.31	0.43	0.000994171
01/02 20:00:00	1191	-17.2	72	0	27	515	1.42	0	1.83765	0.00962144	1.562	0.008	1.51614	0.127146	2.18081	0.00927506	1.39387	0	2.18081	0	0.31	0.43	0.00099813
01/02 21:00:00	1251	-18.3	68	0	27	520	1.42	0	1.83152	0.00899079	1.563	0.008	1.5109	0.131198	2.17764	0.00904197	1.39373	0	2.17764	0	0.31	0.43	0.000819161
01/02 22:00:00	1311	-17.2	76	0	27	525	1.42	0	1.82538	0.00836015	1.5645	0.0085	1.50484	0.135583	2.1746	0.00884543	1.39359	0	2.1746	0	0.31	0.43	0.0009456
01/02 23:00:00	1371	-16.7	79	0	27	530	1.42	0	1.81917	0.00772951	1.566	0.009	1.49811	0.140659	2.17163	0.00865229	1.39345	0	2.17163	0	0.31	0.43	0.000961604
01/02 24:00:00	1431	-15.6	69	0	27	535	1.42	0	1.81272	0.00709887	1.56698	0.009	1.49075	0.146477	2.16872	0.00846283	1.39332	0	2.16872	0	0.31	0.43	0.000968016
01/03 01:00:00	51	-12.2	92	0	27	540	1.42	0	1.80626	0.0074564	1.56796	0.009	1.48283	0.153268	2.16588	0.00827447	1.39319	0	2.16588	0	0.31	0.43	0.000955741
01/03 02:00:00	111	-15	76	1.5	27	545	1.42	0	1.79981	0.00802656	1.56898	0.009	1.47447	0.161171	2.16337	0.00809092	1.39307	0	2.16337	0	0.31	0.43	0.000941003
01/03 03:00:00	171	-14.4	73	0	27	550	1.42	0	1.79272	0.00859673	1.57	0.009	1.46596	0.170544	2.16086	0.00790736	1.39294	0	2.16086	0	0.31	0.43	0.00109227
01/03 04:00:00	231	-16.1	72	0.5	27	555	1.42	0	1.7855	0.00916689	1.5705	0.009	1.45774	0.18166	2.15851	0.0077291	1.39283	0	2.15851	0	0.31	0.43	0.00107886
01/03 05:00:00	291	-17.2	59	0	27	560	1.42	0	1.77829	0.00973705	1.571	0.009	1.45039	0.194802	2.15619	0.00755224	1.39271	0	2.15619	0	0.31	0.43	0.00100466
01/03 06:00:00	351	-16.7	83	0	27	565	1.42	0	1.77236	0.0103072	1.572	0.009	1.44438	0.209924	2.15393	0.0073773	1.3926	0	2.15393	0	0.31	0.43	0.00108957
01/03 07:00:00	411	-14.4	66	0.5	27	570	1.42	0	1.76675	0.0108774	1.573	0.009	1.44005	0.226834	2.1518	0.00720714	1.39248	0	2.1518	0	0.31	0.43	0.00121308
01/03 08:00:00	471	-15	76	0	27	575	1.42	0	1.76113	0.0112552	1.574	0.0095	1.43743	0.245074	2.14967	0.00703698	1.39237	0	2.14967	0	0.31	0.43	0.00119826
01/03 09:00:00	531	-16.1	69	0	27	580	1.42	0	1.75668	0.0116068	1.575	0.01	1.43661	0.264253	2.14766	0.00692778	1.39227	0	2.14766	0	0.31	0.43	0.00107023
01/03 10:00:00	591	-17.2	76	1	27	585	1.42	0	1.75258	0.0119584	1.576	0.01	1.43779	0.284328	2.14571	0.00684919	1.39216	0	2.14571	0	0.31	0.43	0.000916264
01/03 11:00:00	651	-13.3	87	1	27	590	1.42	0	1.74849	0.0123101	1.577	0.01	1.44114	0.305068	2.14377	0.0067706	1.39206	0	2.14377	0	0.31	0.43	0.000826959
01/03 12:00:00	711	-13.9	100	1	27	595	1.42	0	1.74387	0.0126617	1.578	0.01	1.44686	0.326244	2.14204	0.00661992	1.39196	0	2.14204	0	0.31	0.43	0.00103207
01/03 13:00:00	771	-13.3	80	1	27	600	1.42	0	1.73706	0.0128967	1.579	0.01	1.45511	0.347485	2.14034	0.00646296	1.39186	0	2.14034	0	0.31	0.43	0.00116017
01/03 14:00:00	831	-12.2	88	1	27	605	1.42	0	1.73025	0.0126127	1.58	0.01	1.46598	0.368397	2.13864	0.00630934	1.39177	0	2.13864	0	0.31	0.43	0.00102687
01/03 15:00:00	891	-12.2	92	1.5	27	610	1.42	0	1.72343	0.0123288	1.581	0.01	1.47901	0.388253	2.13709	0.00623644	1.39167	0	2.13709	0	0.31	0.43	0.00111611
01/03 16:00:00	951	-11.7	80	1.5	27	615	1.42	0	1.71779	0.0120448	1.582	0.01	1.49334	0.406091	2.13554	0.00616354	1.39158	0	2.13554	0	0.31	0.43	0.00118394
01/03 17:00:00	1011	-12.2	80	1.5	27	620	1.42	0	1.71217	0.0117609	1.583	0.01	1.50822	0.421561	2.134	0.00608952	1.39149	0	2.134	0	0.31	0.43	0.00120342
01/03 18:00:00	1071	-16.1	57	0	27	625	1.42	0	1.70656	0.0114769	1.5835	0.01	1.52305	0.434763	2.13259	0.00594582	1.3914	0	2.13259	0	0.31	0.43	0.00130614
01/03 19:00:00	1131	-13.3	87	0	27	630	1.42	0	1.69945	0.011193	1.584	0.01	1.53713	0.445914	2.13119	0.00580211	1.39131	0	2.13119	0	0.31	0.43	0.00146771
01/03 20:00:00	1191	-12.2	84	0	27	635	1.42	0	1.69223	0.0116259	1.585	0.0105	1.55042	0.455347	2.12979	0.00565841	1.39123	0	2.12979	0	0.31	0.43	0.00142791
01/03 21:00:00	1251	-12.2	84	0	27	640	1.42	0	1.68502	0.0125458	1.586	0.011	1.56356	0.464457	2.12844	0.00557909	1.39114	0	2.12844	0	0.31	0.43	0.0013269
01/03 22:00:00	1311	-14.4	66	0	27	645	1.42	0	1.68056	0.0134656	1.5865	0.011	1.57701	0.473549	2.12711	0.00551232	1.39106	0	2.12711	0	0.31	0.43	0.00143375
01/03 23:00:00	1371	-17.2	72	0	27	650	1.42	0	1.67641	0.0143855	1.587	0.011	1.59105	0.482548	2.12578	0.00544555	1.39098	0	2.12578	0	0.31	0.43	0.00143359
01/03 24:00:00	1431	-17.8	68	0	27	655	1.42	0	1.67225	0.0153053	1.5875	0.011	1.60601	0.491324	2.12454	0.00538017	1.3909	0	2.12454	0	0.31	0.43	0.00140986
01/04 01:00:00	51	-18.3	62	0	27	660	1.42	0	1.6681	0.0162252	1.588	0.011	1.62189	0.499691	2.12341	0.00531624	1.39082	0	2.12341	0	0.31	0.43	0.00131322
01/04 02:00:00	111	-18.3	79	0	27	665	1.42	0	1.66279	0.0171024	1.589	0.011	1.63838	0.506949	2.12227	0.00525231	1.39075	0	2.12227	0	0.31	0.43	0.00117337
01/04 03:00:00	171	-15.6	72	0.5	27	670	1.42	0	1.65717	0.017795	1.59	0.011	1.65533	0.512927	2.12113	0.00518838	1.39067	0	2.12113	0	0.31	0.43	0.00110551
01/04 04:00:00	231	-15	72	0	27	675	1.42	0	1.65156	0.0184875	1.591	0.011	1.67259	0.517572	2.12005	0.00512746	1.3906	0	2.12005	0	0.31	0.43	0.00123739
01/04 05:00:00	291	-14.4	73	0	27	680	1.42	0	1.64376	0.0191801	1.592	0.011	1.68997	0.520705	2.11898	0.00506667	1.39052	0	2.11898	0	0.31	0.43	0.00133489
01/04 06:00:00	351	-14.4	76	0	27	685	1.42	0	1.63525	0.0198726	1.593	0.0115	1.70715	0.522152	2.1179	0.00500588	1.39045	0	2.1179	0	0.31	0.43	0.00150251
01/04 07:00:00	411	-14.4	66	0	27	690	1.42	0	1.62674	0.0205651	1.594	0.012	1.72373	0.521719	2.11685	0.00494579	1.39038	0	2.11685	0	0.31	0.43	0.00168532
01/04 08:00:00	471	-13.9	87	0	27	695	1.42	0	1.62097	0.0210803	1.595	0.012	1.73912	0.519298	2.11589	0.00488793	1.39031	0	2.11589	0	0.31	0.43	0.0014067
01/04 09:00:00	531	-13.9	80	0	27	700	1.42	0	1.61551	0.0214119	1.596	0.012	1.75278	0.514865	2.11493	0.00483007	1.39024	0	2.11493	0	0.31	0.43	0.00144739
01/04 10:00:00	591	-13.9	76	1.5	27	705	1.42	0	1.61006	0.0217435	1.5965	0.012	1.76438	0.508861	2.11397	0.00477222	1.39018	0	2.11397	0	0.31	0.43	0.00144807
01/04 11:00:00	651	-15.6	76	0	27	710	1.42	0	1.60368	0.0220751	1.597	0.012	1.77377	0.501804	2.11304	0.00471525	1.39011	0	2.11304	0	0.31	0.43	0.00109128
01/04 12:00:00	711	-16.1	72	1	27	715	1.42	0	1.59535	0.0224067	1.598	0.012	1.78102	0.494286	2.11219	0.00466029	1.39004	0	2.11219	0	0.31	0.43	0.00089293
01/04 13:00:00	771	-16.1	79	1	27	720	1.42	0	1.58703	0.0227383	1.599	0.012	1.78648	0.486936	2.11133	0.00460534	1.38998	0	2.11133	0	0.31	0.43	0.00112007
01/04 14:00:00	831	-14.4	76	0	27	725	1.42	0	1.57883	0.0229292	1.6	0.012	1.79056	0.480326	2.11048	0.00455039	1.38991	0	2.11048	0	0.31	0.43	0.00131343
01/04 15:00:00	891	-14.4	76	0	27	730	1.42	0	1.57162	0.02294	1.601	0.012	1.79352	0.474585	2.10964	0.00449582	1.38985	0	2.10964	0	0.31	0.43	0.00126309
01/04 16:00:00	951	-16.7	69	0	27	735	1.42	0	1.5644	0.0229508	1.6015	0.0125	1.79569	0.469793	2.10889	0.00444373	1.38979	0	2.10889	0	0.31	0.43	0.00128983
01/04 17:00:00	1011	-16.7	72	0	27	740	1.42	0	1.55724	0.0229616	1.602	0.013	1.79725	0.466008	2.10814	0.00439163	1.38973	0	2.10814	0	0.31	0.43	0.00126357
01/04 18:00:00	1071	-17.2	69	0	27	745	1.42	0	1.55079	0.0229723	1.603	0.013	1.79817	0.463031	2.10738	0.00433953	1.38967	0	2.10738	0	0.31	0.43	0.00144102
01/04 19:00:00	1131	-17.8	65	0	27	750	1.42	0	1.54433	0.0229831	1.604	0.013	1.79819	0.460671	2.10663	0.00428744	1.38961	0	2.10663	0	0.31	0.43	0.00159614
01/04 20:00:00	1191	-18.9	72	0	27	755	1.42	0	1.53788	0.0229939	1.605	0.013	1.79729	0.458898	2.10591	0.00423742	1.38955	0	2.10591	0	0.31	0.43	0.00170994
01/04 21:00:00	1251	-20	65	0	27	760	1.42	0	1.53142	0.0230047	1.606	0.013	1.7956	0.458277	2.10521	0.00418824	1.38949	0	2.10521	0	0.31	0.43	0.00145335
01/04 22:00:00	1311	-18.3	79	0	27	765	1.42	0	1.52497	0.0233383	1.607	0.013	1.79315	0.45881	2.1045	0.00413906	1.38943	0	2.1045	0	0.31	0.43	0.000858818
01/04 23:00:00	1371	-17.8	79	0	27	770	1.42	0	1.51851	0.0246479	1.608	0.013	1.7901	0.460799	2.10379	0.00408987	1.38937	0	2.10379	0	0.31	0.43	0.00117616
01/04 24:00:00	1431	-17.8	72	0	27	775	1.42	0	1.51205	0.0259575	1.6085	0.0135	1.78711	0.464655	2.10309	0.00404168	1.38932	0	2.10309	0	0.31	0.43	0.00166335
01/05 01:00:00	51	-15	72	1.5	27	780	1.42	0	1.5056	0.0272671	1.609	0.014	1.78461	0.470865	2.10247	0.00404287	1.38926	0	2.10247	0	0.31	0.43	0.001303
01/05 02:00:00	111	-12.2	88	1	27	785	1.42	0	1.49914	0.0285767	1.6095	0.014	1.7824	0.478729	2.10185	0.00404406	1.38921	0	2.10185	0	0.31	0.43	0.00105263
01/05 03:00:00	171	-12.2	92	1.5	27	790	1.42	0	1.49269	0.0298863	1.61	0.014	1.78059	0.488132	2.10123	0.00404525	1.38915	0	2.10123	0	0.31	0.43	0.0018541
01/05 04:00:00	231	-11.7	92	1	27	795	1.42	0	1.48497	0.0311959	1.611	0.014	1.77936	0.499593	2.10061	0.00404644	1.3891	0	2.10061	0	0.31	0.43	0.00216522
01/05 05:00:00	291	-11.7	88	1.5	27	800	1.42	0	1.47708	0.0325055	1.612	0.014	1.77848	0.51286	2.09999	0.00404672	1.38904	0	2.09999	0	0.31	0.43	0.00111093
01/05 06:00:00	351	-11.7	88	1.5	27	805	1.42	0	1.46919	0.0330449	1.612	0.014	1.77808	0.528237	2.09945	0.00400304	1.38899	0	2.09945	0	0.31	0.43	0.001157
01/05 07:00:00	411	-11.7	88	1	27	810	1.42	0	1.46184	0.0333586	1.612	0.014	1.77946	0.546778	2.09892	0.00395937	1.38894	0	2.09892	0	0.31	0.43	0.00120267
01/05 08:00:00	471	-12.2	84	0	27	815	1.42	0	1.45502	0.0336724	1.613	0.014	1.78416	0.569876	2.09838	0.00391569	1.38888	0	2.09838	0	0.31	0.43	0.00115799
01/05 09:00:00	531	-12.8	76	0	27	820	1.42	0	1.44821	0.0339861	1.614	0.014	1.79396	0.597126	2.09784	0.00387202	1.38883	0	2.09784	0	0.31	0.43	0.00117674
01/05 10:00:00	591	-12.8	84	1.5	27	825	1.42	0	1.4414	0.0342999	1.615	0.0145	1.81107	0.628999	2.09731	0.00382835	1.38878	0	2.09731	0	0.31	0.43	0.00114782
01/05 11:00:00	651	-12.8	96	1.5	27	830	1.42	0	1.43271	0.0346137	1.616	0.015	1.83703	0.664082	2.09679	0.00378653	1.38873	0	2.09679	0	0.31	0.43	0.0011195
01/05 12:00:00	711	-12.8	84	1.5	27	835	1.42	0	1.42386	0.0350655	1.6165	0.015	1.87224	0.70014	2.09629	0.00374557	1.38868	0	2.09629	0	0.31	0.43	0.00109946
01/05 13:00:00	771	-12.2	80	1.5	27	840	1.42	0	1.41501	0.035758	1.617	0.015	1.9163	0.734094	2.09579	0.0037046	1.38863	0	2.09579	0	0.31	0.43	0.00114812
01/05 14:00:00	831	-12.2	80	1.5	27	845	1.42	0	1.4064	0.0364506	1.618	0.015	1.96784	0.763573	2.09529	0.00366363	1.38858	0	2.09529	0	0.31	0.43	0.0012264
01/05 15:00:00	891	-12.2	80	0	27	850	1.42	0	1.39822	0.0371431	1.619	0.015	2.02483	0.785794	2.09479	0.00362266	1.38853	0	2.09479	0	0.31	0.43	0.00104551
01/05 16:00:00	951	-12.2	70	1	27	855	1.42	0	1.39005	0.0378357	1.6205	0.0155	2.08508	0.79915	2.09429	0.0035817	1.38848	0	2.09429	0	0.31	0.43	0.00117046
01/05 17:00:00	1011	-11.1	84	1	27	860	1.42	0	1.38188	0.0385282	1.622	0.016	2.14653	0.802771	2.09385	0.00354326	1.38844	0	2.09385	0	0.31	0.43	0.00124425
01/05 18:00:00	1071	-12.8	76	0	27	865	1.42	0	1.37418	0.0392953	1.623	0.016	2.2072	0.796402	2.09342	0.00350486	1.38839	0	2.09342	0	0.31	0.43	0.00119369
01/05 19:00:00	1131	-13.3	87	2.1	27	870	1.42	0	1.36661	0.0400995	1.624	0.016	2.26536	0.779951	2.09299	0.00346646	1.38834	0	2.09299	0	0.31	0.43	0.00118083
01/05 20:00:00	1191	-10	74	2.6	27	875	1.42	0	1.35904	0.0409036	1.6255	0.016	2.31906	0.753952	2.09256	0.00342806	1.38829	0	2.09256	0	0.31	0.43	0.00122231
01/05 21:00:00	1251	-10.6	70	5.2	27	880	1.42	0	1.35151	0.0417077	1.627	0.016	2.36614	0.718503	2.09213	0.00338966	1.38824	0	2.09213	0	0.31	0.43	0.00125881
01/05 22:00:00	1311	-12.2	84	2.1	27	885	1.42	0	1.34402	0.0425119	1.6285	0.0165	2.40449	0.674633	2.0917	0.00335126	1.3882	0	2.0917	0	0.31	0.43	0.00122769
01/05 23:00:00	1371	-10	70	4.6	27	890	1.42	0	1.33653	0.043316	1.63	0.017	2.43306	0.623971	2.0913	0.0033472	1.38815	0	2.0913	0	0.31	0.43	0.00117435
01/05 24:00:00	1431	-8.9	67	3.1	27	895	1.42	0	1.32904	0.0441201	1.6315	0.017	2.45144	0.569885	2.0909	0.00334785	1.38811	0	2.0909	0	0.31	0.43	0.00122231
01/06 01:00:00	51	-8.3	65	2.6	27	900	1.42	0	1.31918	0.0449243	1.633	0.017	2.46036	0.514329	2.0905	0.00334849	1.38806	0	2.0905	0	0.31	0.43	0.00112
01/06 02:00:00	111	-8.3	62	1.5	27	905	1.42	0	1.30928	0.0457284	1.6345	0.017	2.46241	0.461489	2.09009	0.00334913	1.38802	0	2.09009	0	0.31	0.43	0.00127207
01/06 03:00:00	171	-8.3	65	3.6	27	910	1.42	0	1.29938	0.0465325	1.636	0.017	2.4603	0.413459	2.08969	0.00334977	1.38797	0	2.08969	0	0.31	0.43	0.00125472
01/06 04:00:00	231	-7.8	59	4.6	27	915	1.42	0	1.28953	0.0481528	1.637	0.017	2.4559	0.370619	2.08929	0.00335041	1.38793	0	2.08929	0	0.31	0.43	0.00121493
01/06 05:00:00	291	-7.8	59	3.6	27	920	1.42	0	1.28068	0.0498864	1.638	0.017	2.45067	0.331887	2.08891	0.00334018	1.38788	0	2.08891	0	0.31	0.43	0.00120825
01/06 06:00:00	351	-7.8	54	3.1	27	925	1.42	0	1.27183	0.05162	1.6395	0.017	2.44501	0.296817	2.08857	0.0033068	1.38784	0	2.08857	0	0.31	0.43	0.00124524
01/06 07:00:00	411	-7.8	65	2.1	27	930	1.42	0	1.26298	0.0533536	1.641	0.017	2.43779	0.262755	2.08824	0.00327343	1.38779	0	2.08824	0	0.31	0.43	0.00121004
01/06 08:00:00	471	-7.8	54	4.1	27	935	1.42	0	1.2533	0.0550872	1.642	0.0175	2.42837	0.228906	2.0879	0.00324006	1.38775	0	2.0879	0	0.31	0.43	0.00116906
01/06 09:00:00	531	-7.8	43	2.6	27	940	1.42	0	1.24271	0.0568208	1.643	0.018	2.41597	0.195775	2.08756	0.00320669	1.3877	0	2.08756	0	0.31	0.43	0.00118053
01/06 10:00:00	591	-7.2	43	6.2	27	945	1.42	0	1.23212	0.0584126	1.6445	0.018	2.39996	0.163015	2.08722	0.00317332	1.38766	0	2.08722	0	0.31	0.43	0.00109318
01/06 11:00:00	651	-7.2	45	6.7	27	950	1.42	0	1.22131	0.0589192	1.646	0.018	2.38083	0.13213	2.08688	0.00313994	1.38762	0	2.08688	0	0.31	0.43	0.00087213
01/06 12:00:00	711	-7.2	43	4.6	27	955	1.42	0	1.20985	0.0594258	1.647	0.018	2.3596	0.104621	2.08655	0.00310718	1.38758	0	2.08655	0	0.31	0.43	0.00079168
01/06 13:00:00	771	-7.2	36	6.7	27	960	1.42	0	1.19839	0.0599324	1.648	0.018	2.33696	0.0809177	2.08624	0.00307621	1.38753	0	2.08624	0	0.31	0.43	0.00131694
01/06 14:00:00	831	-7.2	41	3.6	27	965	1.42	0	1.18692	0.0607899	1.649	0.018	2.31412	0.0612229	2.08592	0.00304523	1.38749	0	2.08592	0	0.31	0.43	0.0012253
01/06 15:00:00	891	-7.2	32	3.6	27	970	1.42	0	1.17814	0.0630585	1.65	0.018	2.29221	0.0462203	2.08561	0.00301426	1.38745	0	2.08561	0	0.31	0.43	0.00113197
01/06 16:00:00	951	-8.9	41	2.6	27	975	1.42	0	1.16976	0.0653271	1.651	0.018	2.27158	0.0348241	2.08529	0.00298329	1.3874	0	2.08529	0	0.31	0.43	0.00124165
01/06 17:00:00	1011	-8.3	39	4.6	27	980	1.42	0	1.16138	0.0675957	1.652	0.018	2.25253	0.0263631	2.08498	0.00295231	1.38736	0	2.08498	0	0.31	0.43	0.00136201
01/06 18:00:00	1071	-8.9	35	3.1	27	985	1.42	0	1.153	0.0698643	1.653	0.018	2.23524	0.0203746	2.08466	0.00292134	1.38732	0	2.08466	0	0.31	0.43	0.00139033
01/06 19:00:00	1131	-8.9	33	3.6	27	990	1.42	0	1.14224	0.0720939	1.654	0.018	2.21964	0.0161816	2.08435	0.00289036	1.38728	0	2.08435	0	0.31	0.43	0.00122032
01/06 20:00:00	1191	-8.9	33	5.2	27	995	1.42	0	1.1232	0.0733635	1.655	0.0185	2.20561	0.0131952	2.08407	0.00287899	1.38724	0	2.08407	0	0.31	0.43	0.00117415
01/06 21:00:00	1251	-8.9	33	4.6	27	1000	1.42	0	1.10416	0.0746331	1.656	0.019	2.19298	0.0110769	2.08381	0.00287935	1.3872	0	2.08381	0	0.31	0.43	0.00134606
01/06 22:00:00	1311	-8.9	35	3.6	27	1005	1.42	0	1.09196	0.0759027	1.657	0.019	2.18158	0.00950923	2.08354	0.00287971	1.3872	0	2.08354	0	0.31	0.43	0.00132751
01/06 23:00:00	1371	-9.4	37	3.6	27	1010	1.42	0	1.0855	0.0771723	1.658	0.019	2.17117	0.00824336	2.08328	0.00288007	1.3872	0	2.08328	0	0.31	0.43	0.00142094
01/06 24:00:00	1431	-9.4	35	4.1	27	1015	1.42	0	1.07904	0.0787404	1.6585	0.019	2.16155	0.00709255	2.08302	0.00288043	1.3872	0	2.08302	0	0.31	0.43	0.00144119
01/07 01:00:00	51	-9.4	35	4.6	27	1020	1.42	0	1.07134	0.0807352	1.659	0.019	2.15257	0.00602871	2.08276	0.00288079	1.3872	0	2.08276	0	0.31	0.43	0.00140439
01/07 02:00:00	111	-9.4	33	5.2	27	1025	1.42	0	1.0565	0.08273	1.6605	0.019	2.14413	0.00504666	2.0825	0.00288116	1.3872	0	2.0825	0	0.31	0.43	0.00145774
01/07 03:00:00	171	-10.6	36	3.1	27	1030	1.42	0	1.04166	0.0847248	1.662	0.019	2.13615	0.00415805	2.08224	0.00288152	1.3872	0	2.08224	0	0.31	0.43	0.00130707
01/07 04:00:00	231	-10.6	35	5.7	27	1035	1.42	0	1.02682	0.0871397	1.6625	0.019	2.12853	0.00334846	2.08198	0.00287224	1.3872	0	2.08198	0	0.31	0.43	0.00148606
01/07 05:00:00	291	-10.6	36	5.2	27	1040	1.42	0	1.0124	0.0899801	1.663	0.019	2.12157	0.00272014	2.08174	0.00284581	1.3872	0	2.08174	0	0.31	0.43	0.00150381
01/07 06:00:00	351	-11.1	46	3.1	27	1045	1.42	0	0.999513	0.0928206	1.6635	0.019	2.11513	0.00259326	2.0815	0.00281939	1.3872	0	2.0815	0	0.31	0.43	0.00150022
01/07 07:00:00	411	-11.1	48	2.6	27	1050	1.42	0	0.986622	0.095661	1.664	0.019	2.10887	0.00195368	2.08126	0.00279296	1.3872	0	2.08126	0	0.31	0.43	0.00155506
01/07 08:00:00	471	-11.1	38	4.1	27	1055	1.42	0	0.973731	0.0985015	1.665	0.019	2.10291	0.00143883	2.08102	0.00276654	1.3872	0	2.08102	0	0.31	0.43	0.0016127
01/07 09:00:00	531	-11.1	40	2.6	27	1060	1.42	0	0.959692	0.101903	1.666	0.019	2.09731	0.00104871	2.08078	0.00274011	1.3872	0	2.08078	0	0.31	0.43	0.00154379
01/07 10:00:00	591	-12.2	55	0	27	1065	1.42	0	0.945407	0.105553	1.667	0.0195	2.09173	0.000677527	2.08054	0.00271369	1.3872	0	2.08054	0	0.31	0.43	0.00142563
01/07 11:00:00	651	-13.3	58	1.5	27	1070	1.42	0	0.931122	0.109202	1.668	0.02	2.0863	0	2.0803	0.00268726	1.3872	0	2.0803	0	0.31	0.43	0.00152913
01/07 12:00:00	711	-11.7	46	1.5	27	1075	1.42	0	0.916326	0.112852	1.6685	0.02	2.08132	0	2.08006	0.00266084	1.3872	0	2.08006	0	0.31	0.43	0.00151807
01/07 13:00:00	771	-11.1	42	1.5	27	1080	1.42	0	0.900004	0.116502	1.669	0.02	2.07663	0	2.07984	0.00263521	1.3872	0	2.07984	0	0.31	0.43	0.00156792
01/07 14:00:00	831	-11.7	50	1.5	27	1085	1.42	0	0.883681	0.120152	1.67	0.02	2.07219	0	2.07964	0.00261092	1.3872	0	2.07964	0	0.31	0.43	0.00158089
01/07 15:00:00	891	-11.7	53	1.5	27	1090	1.42	0	0.867358	0.123801	1.671	0.02	2.06796	0	2.07944	0.00258662	1.3872	0	2.07944	0	0.31	0.43	0.00154698
01/07 16:00:00	951	-12.2	50	3.1	27	1095	1.42	0	0.850319	0.127451	1.6715	0.02	2.06394	0	2.07925	0.00256232	1.3872	0	2.07925	0	0.31	0.43	0.00153472
01/07 17:00:00	1011	-12.8	61	3.6	27	1100	1.42	0	0.83294	0.131101	1.672	0.02	2.06009	0	2.07905	0.00253802	1.3872	0	2.07905	0	0.31	0.43	0.00152475
01/07 18:00:00	1071	-12.8	61	3.1	27	1105	1.42	0	0.81556	0.136224	1.6725	0.02	2.0564	0	2.07885	0.00251372	1.3872	0	2.07885	0	0.31	0.43	0.00157819
01/07 19:00:00	1131	-12.2	61	3.1	27	1110	1.42	0	0.798213	0.142243	1.673	0.02	2.05287	0	2.07865	0.00248943	1.3872	0	2.07865	0	0.31	0.43	0.00159295
01/07 20:00:00	1191	-12.8	63	1.5	27	1115	1.42	0	0.780902	0.148262	1.674	0.02	2.04947	0	2.07846	0.00246513	1.3872	0	2.07846	0	0.31	0.43	0.00159854
01/07 21:00:00	1251	-12.2	55	2.1	27	1120	1.42	0	0.763591	0.154331	1.675	0.02	2.04622	0	2.07826	0.00244083	1.3872	0	2.07826	0	0.31	0.43	0.00154997
01/07 22:00:00	1311	-12.2	70	1.5	27	1125	1.42	0	0.74628	0.161105	1.6765	0.0205	2.04308	0	2.07806	0.00241653	1.3872	0	2.07806	0	0.31	0.43	0.00153063
01/07 23:00:00	1371	-12.8	76	1.5	27	1130	1.42	0	0.72638	0.16788	1.678	0.021	2.04006	0	2.07788	0.0024063	1.3872	0	2.07788	0	0.31	0.43	0.00156284
01/07 24:00:00	1431	-15	63	2.6	27	1135	1.42	0	0.704194	0.174654	1.679	0.021	2.03715	0	2.0777	0.00240651	1.3872	0	2.0777	0	0.31	0.43	0.00149304
01/08 01:00:00	51	-13.9	52	2.1	27	1140	1.42	0	0.682008	0.181475	1.68	0.021	2.03434	0	2.07752	0.00240671	1.3872	0	2.07752	0	0.31	0.43	0.00155745
01/08 02:00:00	111	-13.9	73	2.6	27	1145	1.42	0	0.660464	0.188386	1.6805	0.021	2.03163	0	2.07734	0.00240692	1.3872	0	2.07734	0	0.31	0.43	0.00156374
01/08 03:00:00	171	-14.4	76	3.1	27	1150	1.42	0	0.642976	0.195298	1.681	0.021	2.02901	0	2.07716	0.00240713	1.3872	0	2.07716	0	0.31	0.43	0.00150341
01/08 04:00:00	231	-14.4	76	3.1	27	1155	1.42	0	0.625489	0.202209	1.6815	0.021	2.02648	0	2.07698	0.00240734	1.3872	0	2.07698	0	0.31	0.43	0.00152874
01/08 05:00:00	291	-15.6	69	2.6	27	1160	1.42	0	0.60644	0.211822	1.682	0.021	2.02402	0	2.0768	0.00240755	1.3872	0	2.0768	0	0.31	0.43	0.00160801
01/08 06:00:00	351	-15.6	72	2.6	27	1165	1.42	0	0.586495	0.221552	1.6825	0.021	2.02165	0	2.07663	0.00240775	1.3872	0	2.07663	0	0.31	0.43	0.00154549
01/08 07:00:00	411	-15.6	72	2.1	27	1170	1.42	0	0.566549	0.231283	1.683	0.021	2.01935	0	2.07645	0.00240796	1.3872	0	2.07645	0	0.31	0.43	0.00156264
01/08 08:00:00	471	-15	72	2.1	27	1175	1.42	0	0.540608	0.244331	1.6835	0.021	2.01713	0	2.07627	0.00240817	1.3872	0	2.07627	0	0.31	0.43	0.00161389
01/08 09:00:00	531	-15	72	2.1	27	1180	1.42	0	0.514388	0.258417	1.684	0.021	2.01497	0	2.07609	0.00240838	1.3872	0	2.07609	0	0.31	0.43	0.00155865
01/08 10:00:00	591	-15.6	72	2.6	27	1185	1.42	0	0.489097	0.272348	1.6845	0.021	2.01287	0	2.07594	0.0023914	1.3872	0	2.07594	0	0.31	0.43	0.00156792
01/08 11:00:00	651	-15.6	72	3.1	27	1190	1.42	0	0.464925	0.28588	1.685	0.021	2.01083	0	2.0758	0.00237115	1.3872	0	2.0758	0	0.31	0.43	0.00161838
01/08 12:00:00	711	-15	54	2.6	27	1195	1.42	0	0.448341	0.299412	1.686	0.021	2.00885	0	2.07565	0.00235091	1.3872	0	2.07565	0	0.31	0.43	0.00158707
01/08 13:00:00	771	-15	40	3.6	27	1200	1.42	0	0.433137	0.316123	1.687	0.021	2.00693	0	2.07551	0.00233066	1.3872	0	2.07551	0	0.31	0.43	0.00161349
01/08 14:00:00	831	-15.6	66	3.1	27	1205	1.42	0	0.417933	0.341848	1.6875	0.021	2.00507	0	2.07537	0.00231041	1.3872	0	2.07537	0	0.31	0.43	0.00161309
01/08 15:00:00	891	-16.1	60	2.6	27	1210	1.42	0	0.397259	0.367942	1.688	0.021	2.00325	0	2.07522	0.00229017	1.3872	0	2.07522	0	0.31	0.43	0.00161898
01/08 16:00:00	951	-16.1	69	3.6	27	1215	1.42	0	0.375293	0.391739	1.6885	0.021	2.00148	0	2.07508	0.00226992	1.3872	0	2.07508	0	0.31	0.43	0.00159923
01/08 17:00:00	1011	-17.2	69	3.6	27	1220	1.42	0	0.355838	0.415754	1.689	0.021	1.99976	0	2.07494	0.00224967	1.3872	0	2.07494	0	0.31	0.43	0.00156892
01/08 18:00:00	1071	-17.2	65	3.1	27	1225	1.42	0	0.339036	0.44323	1.6895	0.021	1.99808	0	2.07479	0.00222942	1.3872	0	2.07479	0	0.31	0.43	0.00156383
01/08 19:00:00	1131	-17.2	65	4.1	27	1230	1.42	0	0.322234	0.470707	1.69	0.021	1.99645	0	2.07465	0.00220918	1.3872	0	2.07465	0	0.31	0.43	0.00126798
01/08 20:00:00	1191	-16.7	66	4.6	27	1235	1.42	0	0.30832	0.496606	1.6905	0.021	1.99486	0	2.07451	0.00218893	1.3872	0	2.07451	0	0.31	0.43	0.00142005
01/08 21:00:00	1251	-16.1	63	4.1	27	1240	1.42	0	0.297949	0.519783	1.691	0.021	1.99331	0	2.07437	0.00216933	1.3872	0	2.07437	0	0.31	0.43	0.00153691
01/08 22:00:00	1311	-16.7	57	4.1	27	1245	1.42	0	0.287578	0.556321	1.6915	0.021	1.9918	0	2.07424	0.00216947	1.3872	0	2.07424	0	0.31	0.43	0.00144777
01/08 23:00:00	1371	-17.2	59	3.1	27	1250	1.42	0	0.277207	0.583493	1.692	0.021	1.99032	0	2.07411	0.00216961	1.3872	0	2.07411	0	0.31	0.43	0.00161778
01/08 24:00:00	1431	-17.2	56	3.6	27	1255	1.42	0	0.269523	0.605444	1.6925	0.021	1.98888	0	2.07398	0.00216974	1.3872	0	2.07398	0	0.31	0.43	0.00155506
01/09 01:00:00	51	-17.2	56	5.7	27	1260	1.42	0	0.263005	0.628441	1.693	0.021	1.98748	0	2.07385	0.00216988	1.3872	0	2.07385	0	0.31	0.43	0.00148267
01/09 02:00:00	111	-17.8	59	5.2	27	1265	1.42	0	0.256487	0.651692	1.6935	0.0215	1.9861	0	2.07372	0.00217001	1.3872	0	2.07372	0	0.31	0.43	0.00158577
01/09 03:00:00	171	-17.2	53	4.6	27	1270	1.42	0	0.24997	0.675851	1.694	0.022	1.98476	0	2.07359	0.00217015	1.3872	0	2.07359	0	0.31	0.43	0.00154808
01/09 04:00:00	231	-17.2	54	5.2	27	1275	1.42	0	0.244762	0.698606	1.6945	0.022	1.98345	0	2.07346	0.00217028	1.3872	0	2.07346	0	0.31	0.43	0.00164381
01/09 05:00:00	291	-17.2	56	3.6	27	1280	1.42	0	0.240472	0.719331	1.695	0.022	1.98217	0	2.07333	0.00217042	1.3872	0	2.07333	0	0.31	0.43	0.00156314
01/09 06:00:00	351	-17.2	59	4.1	27	1285	1.42	0	0.236182	0.739258	1.695	0.022	1.98092	0	2.0732	0.00217055	1.3872	0	2.0732	0	0.31	0.43	0.00158986
01/09 07:00:00	411	-17.2	59	6.2	27	1290	1.42	0	0.231892	0.759012	1.695	0.022	1.9797	0	2.07307	0.00217069	1.3872	0	2.07307	0	0.31	0.43	0.00154648
01/09 08:00:00	471	-17.8	59	1.5	27	1295	1.42	0	0.227602	0.778958	1.6955	0.022	1.9785	0	2.07294	0.00217083	1.3872	0	2.07294	0	0.31	0.43	0.00154628
01/09 09:00:00	531	-18.9	68	2.1	27	1300	1.42	0	0.223312	0.798807	1.696	0.022	1.97733	0	2.07281	0.00217096	1.3872	0	2.07281	0	0.31	0.43	0.0015407
01/09 10:00:00	591	-18.3	65	1.5	27	1305	1.42	0	0.220149	0.817751	1.6965	0.022	1.97619	0	2.07268	0.0021711	1.3872	0	2.07268	0	0.31	0.43	0.00149354
01/09 11:00:00	651	-18.3	65	2.6	27	1310	1.42	0	0.219223	0.837139	1.697	0.022	1.97506	0	2.07257	0.0021549	1.3872	0	2.07257	0	0.31	0.43	0.00149234
01/09 12:00:00	711	-18.9	62	1.5	27	1315	1.42	0	0.218297	0.85909	1.697	0.022	1.97397	0	2.07245	0.00213837	1.3872	0	2.07245	0	0.31	0.43	0.00156084
01/09 13:00:00	771	-17.8	65	2.1	27	1320	1.42	0	0.217371	0.881262	1.697	0.022	1.97289	0	2.07233	0.00212185	1.3872	0	2.07233	0	0.31	0.43	0.00145455
01/09 14:00:00	831	-17.8	65	2.1	27	1325	1.42	0	0.216446	0.904317	1.6975	0.022	1.97184	0	2.07222	0.00210532	1.3872	0	2.07222	0	0.31	0.43	0.00155905
01/09 15:00:00	891	-16.1	51	4.1	27	1330	1.42	0	0.21552	0.924339	1.698	0.022	1.97081	0	2.0721	0.00208879	1.3872	0	2.0721	0	0.31	0.43	0.00162177
01/09 16:00:00	951	-15.6	52	2.6	27	1335	1.42	0	0.213514	0.940357	1.6985	0.022	1.9698	0	2.07198	0.00207226	1.3872	0	2.07198	0	0.31	0.43	0.00155157
01/09 17:00:00	1011	-15.6	52	4.1	27	1340	1.42	0	0.211481	0.956367	1.699	0.022	1.96881	0	2.07187	0.00205573	1.3872	0	2.07187	0	0.31	0.43	0.00151218
01/09 18:00:00	1071	-17.8	65	3.1	27	1345	1.42	0	0.209448	0.972308	1.6995	0.022	1.96784	0	2.07175	0.0020392	1.3872	0	2.07175	0	0.31	0.43	0.00158478
01/09 19:00:00	1131	-17.2	65	2.1	27	1350	1.42	0	0.207416	0.988477	1.7	0.022	1.96689	0	2.07163	0.00202268	1.3872	0	2.07163	0	0.31	0.43	0.00154369
01/09 20:00:00	1191	-17.8	65	1.5	27	1355	1.42	0	0.205459	1.0057	1.7005	0.022	1.96596	0	2.07152	0.00200615	1.3872	0	2.07152	0	0.31	0.43	0.00157241
01/09 21:00:00	1251	-17.2	65	2.6	27	1360	1.42	0	0.203929	1.02293	1.701	0.022	1.96504	0	2.0714	0.00198962	1.3872	0	2.0714	0	0.31	0.43	0.00161399
01/09 22:00:00	1311	-18.3	65	3.6	27	1365	1.42	0	0.202399	1.03849	1.701	0.022	1.96414	0	2.07128	0.00197309	1.3872	0	2.07128	0	0.31	0.43	0.00151627
01/09 23:00:00	1371	-18.3	62	1.5	27	1370	1.42	0	0.20087	1.05331	1.701	0.022	1.96326	0	2.07117	0.00195656	1.3872	0	2.07117	0	0.31	0.43	0.00148426
01/09 24:00:00	1431	-17.2	59	2.6	27	1375	1.42	0	0.19934	1.06814	1.7015	0.022	1.9624	0	2.07105	0.00194003	1.3872	0	2.07105	0	0.31	0.43	0.00152704
01/10 01:00:00	51	-20	65	0	27	1380	1.42	0	0.198119	1.09032	1.702	0.022	1.96155	0	2.07095	0.00193148	1.3872	0	2.07095	0	0.31	0.43	0.0015411
01/10 02:00:00	111	-18.3	59	0	27	1385	1.42	0	0.197533	1.1149	1.702	0.022	1.96072	0	2.07086	0.00193156	1.3872	0	2.07086	0	0.31	0.43	0.00125581
01/10 03:00:00	171	-20.6	68	0	27	1390	1.42	0	0.196947	1.12878	1.702	0.022	1.9599	0	2.07077	0.00193165	1.3872	0	2.07077	0	0.31	0.43	0.0014362
01/10 04:00:00	231	-20	71	0	27	1395	1.42	0	0.19636	1.14266	1.7025	0.022	1.9591	0	2.07068	0.00193173	1.3872	0	2.07068	0	0.31	0.43	0.00139173
01/10 05:00:00	291	-20.6	68	1.5	27	1400	1.42	0	0.195826	1.15633	1.703	0.022	1.95831	0	2.07059	0.00193181	1.3872	0	2.07059	0	0.31	0.43	0.00151926
01/10 06:00:00	351	-20.6	71	1.5	27	1405	1.42	0	0.196561	1.16971	1.7035	0.022	1.95754	0	2.0705	0.0019319	1.3872	0	2.0705	0	0.31	0.43	0.00153023
01/10 07:00:00	411	-20.6	75	0	27	1410	1.42	0	0.197296	1.1831	1.704	0.022	1.95678	0	2.07041	0.00193198	1.3872	0	2.07041	0	0.31	0.43	0.00156453
01/10 08:00:00	471	-20.6	64	0	27	1415	1.42	0	0.19803	1.19776	1.704	0.022	1.95603	0	2.07032	0.00193206	1.3872	0	2.07032	0	0.31	0.43	0.00147469
01/10 09:00:00	531	-18.3	79	0	27	1420	1.42	0	0.198942	1.21656	1.704	0.022	1.95529	0	2.07023	0.00193215	1.3872	0	2.07023	0	0.31	0.43	0.00158597
01/10 10:00:00	591	-17.8	83	0	27	1425	1.42	0	0.199892	1.23536	1.7045	0.0225	1.95457	0	2.07014	0.00193223	1.3872	0	2.07014	0	0.31	0.43	0.00157361
01/10 11:00:00	651	-17.2	87	0	27	1430	1.42	0	0.200843	1.24962	1.705	0.023	1.95386	0	2.07005	0.00193231	1.3872	0	2.07005	0	0.31	0.43	0.00152973
01/10 12:00:00	711	-16.7	76	0	27	1435	1.42	0	0.201793	1.2624	1.7055	0.023	1.95317	0	2.06996	0.0019324	1.3872	0	2.06996	0	0.31	0.43	0.00133788
01/10 13:00:00	771	-17.2	83	0	27	1440	1.42	0	0.202743	1.27517	1.706	0.023	1.95248	0	2.06987	0.00193248	1.3872	0	2.06987	0	0.31	0.43	0.00153133
01/10 14:00:00	831	-16.7	79	0	27	1445	1.42	0	0.202896	1.28731	1.7065	0.023	1.95181	0	2.06978	0.00193256	1.3872	0	2.06978	0	0.31	0.43	0.00160252
01/10 15:00:00	891	-16.7	76	0	27	1450	1.42	0	0.202876	1.29895	1.707	0.023	1.95114	0	2.06969	0.00193265	1.3872	0	2.06969	0	0.31	0.43	0.0015402
01/10 16:00:00	951	-17.2	76	0	27	1455	1.42	0	0.202856	1.31058	1.707	0.023	1.95049	0	2.06961	0.00193273	1.3872	0	2.06961	0	0.31	0.43	0.00162456
01/10 17:00:00	1011	-20	71	0	27	1460	1.42	0	0.202835	1.32436	1.707	0.023	1.94985	0	2.06952	0.0019292	1.3872	0	2.06952	0	0.31	0.43	0.00159525
01/10 18:00:00	1071	-20.6	64	0	27	1465	1.42	0	0.202815	1.33897	1.7075	0.023	1.94922	0	2.06944	0.00191602	1.3872	0	2.06944	0	0.31	0.43	0.00142453
01/10 19:00:00	1131	-20.6	75	0	27	1470	1.42	0	0.202795	1.35575	1.708	0.023	1.9486	0	2.06936	0.00190283	1.3872	0	2.06936	0	0.31	0.43	0.00152584
01/10 20:00:00	1191	-20.6	75	0	27	1475	1.42	0	0.202775	1.37403	1.708	0.023	1.94799	0	2.06928	0.00188964	1.3872	0	2.06928	0	0.31	0.43	0.00154908
01/10 21:00:00	1251	-18.9	68	0	27	1480	1.42	0	0.202754	1.38825	1.708	0.023	1.94739	0	2.0692	0.00187646	1.3872	0	2.0692	0	0.31	0.43	0.00161529
01/10 22:00:00	1311	-18.3	68	2.1	27	1485	1.42	0	0.202734	1.39782	1.7085	0.023	1.94679	0	2.06912	0.00186327	1.3872	0	2.06912	0	0.31	0.43	0.00149463
01/10 23:00:00	1371	-18.3	72	0	27	1490	1.42	0	0.202714	1.4074	1.709	0.023	1.94621	0	2.06904	0.00185009	1.3872	0	2.06904	0	0.31	0.43	0.00156932
01/10 24:00:00	1431	-20	68	0	27	1495	1.42	0	0.202304	1.41889	1.709	0.023	1.94564	0	2.06896	0.0018369	1.3872	0	2.06896	0	0.31	0.43	0.00153083
01/11 01:00:00	51	-18.9	65	0	27	1500	1.42	0	0.201435	1.43153	1.709	0.023	1.94507	0	2.06888	0.00182371	1.3872	0	2.06888	0	0.31	0.43	0.00147828
01/11 02:00:00	111	-18.3	65	0	27	1505	1.42	0	0.200565	1.4445	1.7095	0.023	1.94452	0	2.0688	0.00181053	1.3872	0	2.0688	0	0.31	0.43	0.00142104
01/11 03:00:00	171	-18.3	72	0	27	1510	1.42	0	0.199696	1.4582	1.71	0.023	1.94397	0	2.06872	0.00179734	1.3872	0	2.06872	0	0.31	0.43	0.00154668
01/11 04:00:00	231	-20	75	0	27	1515	1.42	0	0.198827	1.47189	1.7105	0.023	1.94343	0	2.06864	0.00178416	1.3872	0	2.06864	0	0.31	0.43	0.00152126
01/11 05:00:00	291	-20.6	71	0	27	1520	1.42	0	0.197957	1.48558	1.711	0.023	1.9429	0	2.06856	0.00177097	1.3872	0	2.06856	0	0.31	0.43	0.0015747
01/11 06:00:00	351	-20.6	68	1.5	27	1525	1.42	0	0.198761	1.4993	1.71	0.023	1.94237	0	2.06848	0.00175778	1.3872	0	2.06848	0	0.31	0.43	0.00153911
01/11 07:00:00	411	-22.2	71	1.5	27	1530	1.42	0	0.200146	1.51339	1.709	0.023	1.94186	0	2.0684	0.0017446	1.3872	0	2.0684	0	0.31	0.43	0.00152475
01/11 08:00:00	471	-22.8	78	1.5	27	1535	1.42	0	0.201531	1.52747	1.709	0.023	1.94135	0	2.06833	0.00173141	1.3872	0	2.06833	0	0.31	0.43	0.00154459
01/11 09:00:00	531	-21.7	67	1.5	27	1540	1.42	0	0.202916	1.5411	1.709	0.023	1.94085	0	2.06825	0.00171822	1.3872	0	2.06825	0	0.31	0.43	0.00150062
01/11 10:00:00	591	-21.1	68	0	27	1545	1.42	0	0.204301	1.55441	1.7105	0.023	1.94035	0	2.06817	0.00170504	1.3872	0	2.06817	0	0.31	0.43	0.00154758
01/11 11:00:00	651	-19.4	68	0	27	1550	1.42	0	0.204898	1.56768	1.712	0.023	1.93987	0	2.06809	0.00169238	1.3872	0	2.06809	0	0.31	0.43	0.00153552
01/11 12:00:00	711	-18.9	75	1.5	27	1555	1.42	0	0.204878	1.58069	1.7125	0.023	1.93939	0	2.06803	0.00169243	1.3872	0	2.06803	0	0.31	0.43	0.00153382
01/11 13:00:00	771	-18.3	72	0	27	1560	1.42	0	0.204858	1.59369	1.713	0.023	1.93891	0	2.06797	0.00169248	1.3872	0	2.06797	0	0.31	0.43	0.00156523
01/11 14:00:00	831	-17.8	79	0	27	1565	1.42	0	0.204838	1.60571	1.713	0.023	1.93845	0	2.06791	0.00169253	1.3872	0	2.06791	0	0.31	0.43	0.00152066
01/11 15:00:00	891	-17.8	75	0	27	1570	1.42	0	0.204818	1.61483	1.713	0.023	1.93799	0	2.06785	0.00169257	1.3872	0	2.06785	0	0.31	0.43	0.00155047
01/11 16:00:00	951	-17.8	79	0	27	1575	1.42	0	0.204797	1.62395	1.7125	0.023	1.93753	0	2.06779	0.00169262	1.3872	0	2.06779	0	0.31	0.43	0.00155895
01/11 17:00:00	1011	-17.2	79	0	27	1580	1.42	0	0.204777	1.63334	1.712	0.023	1.93709	0	2.06774	0.00169267	1.3872	0	2.06774	0	0.31	0.43	0.00153223
01/11 18:00:00	1071	-18.3	72	1.5	27	1585	1.42	0	0.204757	1.64703	1.712	0.0235	1.93664	0	2.06768	0.00169272	1.3872	0	2.06768	0	0.31	0.43	0.00149453
01/11 19:00:00	1131	-18.9	72	1.5	27	1590	1.42	0	0.204737	1.66072	1.712	0.024	1.93621	0	2.06762	0.00169277	1.3872	0	2.06762	0	0.31	0.43	0.00152664
01/11 20:00:00	1191	-19.4	75	0	27	1595	1.42	0	0.204716	1.67399	1.713	0.024	1.93578	0	2.06756	0.00169281	1.3872	0	2.06756	0	0.31	0.43	0.00144418
01/11 21:00:00	1251	-19.4	68	0	27	1600	1.42	0	0.204696	1.68572	1.714	0.024	1.93536	0	2.0675	0.00169286	1.3872	0	2.0675	0	0.31	0.43	0.0014698
01/11 22:00:00	1311	-17.2	83	0	27	1605	1.42	0	0.204676	1.69745	1.714	0.024	1.93494	0	2.06744	0.00169291	1.3872	0	2.06744	0	0.31	0.43	0.00155506
01/11 23:00:00	1371	-16.7	72	2.1	27	1610	1.42	0	0.205178	1.71197	1.714	0.024	1.93453	0	2.06738	0.00169296	1.3872	0	2.06738	0	0.31	0.43	0.00148047
01/11 24:00:00	1431	-17.8	68	0	27	1615	1.42	0	0.205837	1.7275	1.714	0.024	1.93412	0	2.06733	0.001693	1.3872	0	2.06733	0	0.31	0.43	0.00153641
01/12 01:00:00	51	-17.2	76	1.5	27	1620	1.42	0	0.206496	1.73834	1.714	0.024	1.93372	0	2.06727	0.00169305	1.3872	0	2.06727	0	0.31	0.43	0.0015063
01/12 02:00:00	111	-17.8	62	0	27	1625	1.42	0	0.206756	1.74616	1.7145	0.024	1.93332	0	2.06721	0.0016931	1.3872	0	2.06721	0	0.31	0.43	0.00151577
01/12 03:00:00	171	-17.8	75	0	27	1630	1.42	0	0.205377	1.75476	1.715	0.024	1.93293	0	2.06715	0.00169315	1.3872	0	2.06715	0	0.31	0.43	0.00143331
01/12 04:00:00	231	-18.3	79	0	27	1635	1.42	0	0.203998	1.76908	1.7155	0.024	1.93255	0	2.06709	0.0016932	1.3872	0	2.06709	0	0.31	0.43	0.00152764
01/12 05:00:00	291	-18.3	75	0	27	1640	1.42	0	0.20262	1.78341	1.716	0.024	1.93217	0	2.06703	0.00169324	1.3872	0	2.06703	0	0.31	0.43	0.00151368
01/12 06:00:00	351	-18.9	72	1.5	27	1645	1.42	0	0.203102	1.79435	1.716	0.024	1.93179	0	2.06698	0.00169329	1.3872	0	2.06698	0	0.31	0.43	0.00147648
01/12 07:00:00	411	-18.3	72	0	27	1650	1.42	0	0.204712	1.80451	1.716	0.024	1.93142	0	2.06692	0.00169334	1.3872	0	2.06692	0	0.31	0.43	0.00147738
01/12 08:00:00	471	-18.9	72	0	27	1655	1.42	0	0.206322	1.81719	1.7165	0.024	1.93105	0	2.06686	0.00168953	1.3872	0	2.06686	0	0.31	0.43	0.00142902
01/12 09:00:00	531	-18.9	75	0	27	1660	1.42	0	0.207932	1.83501	1.717	0.024	1.93069	0	2.06681	0.00167932	1.3872	0	2.06681	0	0.31	0.43	0.00150909
01/12 10:00:00	591	-18.9	72	2.1	27	1665	1.42	0	0.209288	1.84716	1.717	0.024	1.93034	0	2.06676	0.00166912	1.3872	0	2.06676	0	0.31	0.43	0.00151547
01/12 11:00:00	651	-20	75	0	27	1670	1.42	0	0.209267	1.85875	1.717	0.024	1.92998	0	2.06671	0.00165891	1.3872	0	2.06671	0	0.31	0.43	0.0015076
01/12 12:00:00	711	-20	68	0	27	1675	1.42	0	0.209247	1.87035	1.717	0.024	1.92963	0	2.06666	0.0016487	1.3872	0	2.06666	0	0.31	0.43	0.00147349
01/12 13:00:00	771	-18.9	72	1.5	27	1680	1.42	0	0.209227	1.88088	1.717	0.024	1.92929	0	2.0666	0.00163849	1.3872	0	2.0666	0	0.31	0.43	0.00146123
01/12 14:00:00	831	-18.3	72	0	27	1685	1.42	0	0.209207	1.89128	1.717	0.024	1.92895	0	2.06655	0.00162829	1.3872	0	2.06655	0	0.31	0.43	0.00149802
01/12 15:00:00	891	-17.8	79	0	27	1690	1.42	0	0.209186	1.90168	1.717	0.024	1.92861	0	2.0665	0.00161808	1.3872	0	2.0665	0	0.31	0.43	0.00145185
01/12 16:00:00	951	-17.8	75	0	27	1695	1.42	0	0.209166	1.91208	1.7175	0.024	1.92828	0	2.06645	0.00160787	1.3872	0	2.06645	0	0.31	0.43	0.00147279
01/12 17:00:00	1011	-17.8	72	2.1	27	1700	1.42	0	0.209146	1.92248	1.718	0.024	1.92796	0	2.0664	0.00159766	1.3872	0	2.0664	0	0.31	0.43	0.00149772
01/12 18:00:00	1071	-18.3	75	2.1	27	1705	1.42	0	0.209126	1.93288	1.718	0.024	1.92763	0	2.06635	0.00158746	1.3872	0	2.06635	0	0.31	0.43	0.0015046
01/12 19:00:00	1131	-20	71	0	27	1710	1.42	0	0.209106	1.94328	1.718	0.024	1.92731	0	2.0663	0.00157725	1.3872	0	2.0663	0	0.31	0.43	0.00152764
01/12 20:00:00	1191	-18.9	72	1.5	27	1715	1.42	0	0.209085	1.95368	1.7185	0.024	1.927	0	2.06625	0.00156704	1.3872	0	2.06625	0	0.31	0.43	0.00154349
01/12 21:00:00	1251	-19.4	71	1.5	27	1720	1.42	0	0.209065	1.96408	1.719	0.024	1.92668	0	2.06619	0.00155683	1.3872	0	2.06619	0	0.31	0.43	0.0015404
01/12 22:00:00	1311	-18.9	83	0	27	1725	1.42	0	0.209045	1.97448	1.7195	0.024	1.92638	0	2.06614	0.00154663	1.3872	0	2.06614	0	0.31	0.43	0.00152804
01/12 23:00:00	1371	-18.3	87	2.6	27	1730	1.42	0	0.209025	1.98488	1.72	0.024	1.92607	0	2.06609	0.00153642	1.3872	0	2.06609	0	0.31	0.43	0.00149104
01/12 24:00:00	1431	-17.8	87	1.5	27	1735	1.42	0	0.209004	1.99528	1.72	0.024	1.92577	0	2.06604	0.00152621	1.3872	0	2.06604	0	0.31	0.43	0.00152375
01/13 01:00:00	51	-17.8	79	1.5	27	1740	1.42	0	0.208984	2.00568	1.72	0.024	1.92547	0	2.06599	0.001516	1.3872	0	2.06599	0	0.31	0.43	0.00148915
01/13 02:00:00	111	-18.9	83	2.1	27	1745	1.42	0	0.208964	2.01608	1.7205	0.024	1.92518	0	2.06594	0.0015058	1.3872	0	2.06594	0	0.31	0.43	0.00128573
01/13 03:00:00	171	-19.4	68	0	27	1750	1.42	0	0.208944	2.02648	1.721	0.024	1.92489	0	2.06589	0.00149559	1.3872	0	2.06589	0	0.31	0.43	0.001367
01/13 04:00:00	231	-19.4	71	0	27	1755	1.42	0	0.208924	2.03688	1.721	0.024	1.9246	0	2.06584	0.00148538	1.3872	0	2.06584	0	0.31	0.43	0.00146203
01/13 05:00:00	291	-19.4	71	0	27	1760	1.42	0	0.208903	2.04728	1.721	0.024	1.92431	0	2.06578	0.00147517	1.3872	0	2.06578	0	0.31	0.43	0.00143131
01/13 06:00:00	351	-18.3	79	1.5	27	1765	1.42	0	0.208883	2.05768	1.7215	0.024	1.92403	0	2.06573	0.00146497	1.3872	0	2.06573	0	0.31	0.43	0.00145195
01/13 07:00:00	411	-18.3	83	2.6	27	1770	1.42	0	0.208863	2.06808	1.722	0.024	1.92376	0	2.06568	0.00145476	1.3872	0	2.06568	0	0.31	0.43	0.00144497
01/13 08:00:00	471	-17.8	79	2.1	27	1775	1.42	0	0.208843	2.07848	1.722	0.024	1.92348	0	2.06564	0.00145233	1.3872	0	2.06564	0	0.31	0.43	0.00142673
01/13 09:00:00	531	-17.8	79	1.5	27	1780	1.42	0	0.208822	2.08888	1.722	0.024	1.92321	0	2.06559	0.00145236	1.3872	0	2.06559	0	0.31	0.43	0.0014703
01/13 10:00:00	591	-17.8	87	2.6	27	1785	1.42	0	0.208802	2.09928	1.7225	0.024	1.92294	0	2.06555	0.0014524	1.3872	0	2.06555	0	0.31	0.43	0.00147459
01/13 11:00:00	651	-18.9	72	0	27	1790	1.42	0	0.208782	2.10968	1.723	0.024	1.92267	0	2.0655	0.00145243	1.3872	0	2.0655	0	0.31	0.43	0.00145654
01/13 12:00:00	711	-17.2	76	0	27	1795	1.42	0	0.208762	2.12008	1.7225	0.024	1.92241	0	2.06546	0.00145246	1.3872	0	2.06546	0	0.31	0.43	0.00145644
01/13 13:00:00	771	-17.2	76	1.5	27	1800	1.42	0	0.208741	2.13049	1.722	0.024	1.92215	0	2.06541	0.00145249	1.3872	0	2.06541	0	0.31	0.43	0.0014711
01/13 14:00:00	831	-16.7	79	0	27	1805	1.42	0	0.208721	2.14089	1.721	0.024	1.92189	0	2.06537	0.00145252	1.3872	0	2.06537	0	0.31	0.43	0.00145375
01/13 15:00:00	891	-16.1	83	2.1	27	1810	1.42	0	0.208701	2.15129	1.72	0.024	1.92164	0	2.06533	0.00145255	1.3872	0	2.06533	0	0.31	0.43	0.00143191
01/13 16:00:00	951	-16.1	72	0	27	1815	1.42	0	0.208681	2.16169	1.7205	0.0245	1.92139	0	2.06528	0.00145258	1.3872	0	2.06528	0	0.31	0.43	0.00146222
01/13 17:00:00	1011	-16.1	76	1.5	27	1820	1.42	0	0.208661	2.17209	1.721	0.025	1.92114	0	2.06524	0.00145261	1.3872	0	2.06524	0	0.31	0.43	0.00148785
01/13 18:00:00	1071	-17.2	76	0	27	1825	1.42	0	0.20864	2.18249	1.722	0.025	1.92089	0	2.06519	0.00145265	1.3872	0	2.06519	0	0.31	0.43	0.00148526
01/13 19:00:00	1131	-18.3	72	0	27	1830	1.42	0	0.20862	2.19289	1.723	0.025	1.92065	0	2.06515	0.00145268	1.3872	0	2.06515	0	0.31	0.43	0.00147798
01/13 20:00:00	1191	-17.2	76	0	27	1835	1.42	0	0.2086	2.20329	1.724	0.025	1.92041	0	2.0651	0.00145271	1.3872	0	2.0651	0	0.31	0.43	0.00148685
01/13 21:00:00	1251	-18.3	72	1.5	27	1840	1.42	0	0.20858	2.21369	1.725	0.025	1.92017	0	2.06506	0.00145274	1.3872	0	2.06506	0	0.31	0.43	0.00148197
01/13 22:00:00	1311	-17.8	87	0	27	1845	1.42	0	0.208559	2.22409	1.7245	0.0245	1.91993	0	2.06501	0.00145277	1.3872	0	2.06501	0	0.31	0.43	0.0014707
01/13 23:00:00	1371	-17.2	76	0	27	1850	1.42	0	0.208539	2.23449	1.724	0.024	1.9197	0	2.06497	0.0014528	1.3872	0	2.06497	0	0.31	0.43	0.00146442
01/13 24:00:00	1431	-17.2	83	0	27	1855	1.42	0	0.208519	2.24489	1.723	0.024	1.91947	0	2.06493	0.00145283	1.3872	0	2.06493	0	0.31	0.43	0.00145694
01/14 01:00:00	51	-16.1	54	1.5	27	1860	1.42	0	0.208499	2.25529	1.722	0.024	1.91924	0	2.06488	0.00145286	1.3872	0	2.06488	0	0.31	0.43	0.00147888
01/14 02:00:00	111	-16.1	83	0	27	1865	1.42	0	0.208479	2.26569	1.722	0.0245	1.91902	0	2.06484	0.0014529	1.3872	0	2.06484	0	0.31	0.43	0.00145794
01/14 03:00:00	171	-16.7	72	0	27	1870	1.42	0	0.208458	2.27609	1.722	0.025	1.91879	0	2.06479	0.00145293	1.3872	0	2.06479	0	0.31	0.43	0.00141356
01/14 04:00:00	231	-16.1	76	0	27	1875	1.42	0	0.208438	2.28649	1.7225	0.025	1.91857	0	2.06475	0.00145296	1.3872	0	2.06475	0	0.31	0.43	0.00146552
01/14 05:00:00	291	-17.8	42	0	27	1880	1.42	0	0.208418	2.29689	1.723	0.025	1.91835	0	2.0647	0.00145299	1.3872	0	2.0647	0	0.31	0.43	0.00142693
01/14 06:00:00	351	-16.1	83	1.5	27	1885	1.42	0	0.208398	2.30729	1.7235	0.025	1.91813	0	2.06466	0.00145302	1.3872	0	2.06466	0	0.31	0.43	0.00140878
01/14 07:00:00	411	-16.7	66	0	27	1890	1.42	0	0.208377	2.31769	1.724	0.025	1.91792	0	2.06461	0.00145305	1.3872	0	2.06461	0	0.31	0.43	0.00146222
01/14 08:00:00	471	-17.8	68	0	27	1895	1.42	0	0.208357	2.32809	1.7245	0.025	1.91771	0	2.06457	0.00145308	1.3872	0	2.06457	0	0.31	0.43	0.00146911
01/14 09:00:00	531	-19.4	65	0	27	1900	1.42	0	0.208337	2.33849	1.725	0.025	1.9175	0	2.06453	0.00145311	1.3872	0	2.06453	0	0.31	0.43	0.0014697
01/14 10:00:00	591	-18.3	75	0	27	1905	1.42	0	0.208317	2.34889	1.725	0.025	1.91729	0	2.06448	0.00145314	1.3872	0	2.06448	0	0.31	0.43	0.00147599
01/14 11:00:00	651	-17.2	79	2.1	27	1910	1.42	0	0.208296	2.35929	1.725	0.025	1.91708	0	2.06444	0.00144928	1.3872	0	2.06444	0	0.31	0.43	0.00142284
01/14 12:00:00	711	-16.1	47	0	27	1915	1.42	0	0.208276	2.36969	1.7255	0.025	1.91688	0	2.06441	0.00144168	1.3872	0	2.06441	0	0.31	0.43	0.00141247
01/14 13:00:00	771	-14.4	91	2.1	27	1920	1.42	0	0.208256	2.3801	1.726	0.025	1.91667	0	2.06438	0.00143408	1.3872	0	2.06438	0	0.31	0.43	0.00140778
01/14 14:00:00	831	-15.6	66	0	27	1925	1.42	0	0.208236	2.3905	1.726	0.025	1.91647	0	2.06435	0.00142648	1.3872	0	2.06435	0	0.31	0.43	0.00139861
01/14 15:00:00	891	-13.9	50	3.6	27	1930	1.42	0	0.208216	2.4009	1.726	0.025	1.91628	0	2.06432	0.00141888	1.3872	0	2.06432	0	0.31	0.43	0.00139721
01/14 16:00:00	951	-12.8	76	3.6	27	1935	1.42	0	0.208195	2.4113	1.7265	0.025	1.91608	0	2.06429	0.00141128	1.3872	0	2.06429	0	0.31	0.43	0.0014376
01/14 17:00:00	1011	-12.8	76	4.1	27	1940	1.42	0	0.208175	2.4217	1.727	0.025	1.91589	0	2.06426	0.00140368	1.3872	0	2.06426	0	0.31	0.43	0.00135922
01/14 18:00:00	1071	-12.2	64	2.6	27	1945	1.42	0	0.208155	2.4321	1.7275	0.025	1.91569	0	2.06423	0.00139608	1.3872	0	2.06423	0	0.31	0.43	0.00140738
01/14 19:00:00	1131	-11.7	64	3.1	27	1950	1.42	0	0.208135	2.4425	1.728	0.025	1.9155	0	2.0642	0.00138848	1.3872	0	2.0642	0	0.31	0.43	0.00138844
01/14 20:00:00	1191	-11.1	70	4.6	27	1955	1.42	0	0.208114	2.4529	1.728	0.025	1.91531	0	2.06417	0.00138088	1.3872	0	2.06417	0	0.31	0.43	0.00141207
01/14 21:00:00	1251	-11.1	73	4.1	27	1960	1.42	0	0.208094	2.4633	1.728	0.025	1.91513	0	2.06414	0.00137328	1.3872	0	2.06414	0	0.31	0.43	0.00135992
01/14 22:00:00	1311	-11.1	80	5.2	27	1965	1.42	0	0.208074	2.4737	1.728	0.025	1.91494	0	2.06411	0.00136568	1.3872	0	2.06411	0	0.31	0.43	0.00144667
01/14 23:00:00	1371	-10.6	70	6.7	27	1970	1.42	0	0.208054	2.4841	1.728	0.025	1.91476	0	2.06408	0.00135808	1.3872	0	2.06408	0	0.31	0.43	0.00142433
01/14 24:00:00	1431	-10.6	70	4.1	27	1975	1.42	0	0.208034	2.4945	1.728	0.025	1.91458	0	2.06405	0.00135048	1.3872	0	2.06405	0	0.31	0.43	0.00144168
01/15 01:00:00	51	-10	67	3.6	27	1980	1.42	0	0.208013	2.5049	1.728	0.025	1.9144	0	2.06402	0.00134288	1.3872	0	2.06402	0	0.31	0.43	0.00140878
01/15 02:00:00	111	-9.4	67	4.6	27	1985	1.42	0	0.207993	2.5153	1.728	0.025	1.91422	0	2.06399	0.00133528	1.3872	0	2.06399	0	0.31	0.43	0.00145684
01/15 03:00:00	171	-9.4	64	4.6	27	1990	1.42	0	0.207973	2.5257	1.728	0.025	1.91404	0	2.06396	0.00132768	1.3872	0	2.06396	0	0.31	0.43	0.00146651
01/15 04:00:00	231	-9.4	61	4.1	27	1995	1.42	0	0.207953	2.5361	1.728	0.025	1.91387	0	2.06393	0.00132008	1.3872	0	2.06393	0	0.31	0.43	0.00146043
01/15 05:00:00	291	-10	61	3.1	27	2000	1.42	0	0.207932	2.5465	1.728	0.025	1.91369	0	2.0639	0.00131247	1.3872	0	2.0639	0	0.31	0.43	0.00142992
01/15 06:00:00	351	-9.4	51	3.1	27																0.31	0.43	0.00143071
01/15 07:00:00	411	-9.4	54	4.6	27																0.31	0.43	0.00143351
01/15 08:00:00	471	-9.4	64	5.2	27																0.31	0.43	0.00144836
01/15 09:00:00	531	-8.3	68	3.6	27																0.31	0.43	0.00144208
01/15 10:00:00	591	-8.3	68	4.1	27																0.31	0.43	0.00145255
01/15 11:00:00	651	-8.3	71	4.6	27																0.31	0.43	0.00141097
01/15 12:00:00	711	-8.3	71	4.1	27																0.31	0.43	0.00140459
01/15 13:00:00	771	-8.3	74	4.1	27																0.31	0.43	0.00139123
01/15 14:00:00	831	-7.8	71	3.6	27																0.31	0.43	0.00134805
01/15 15:00:00	891	-6.7	62	4.1	27																0.31	0.43	0.00135553
01/15 16:00:00	951	-6.1	65	3.6	27																0.31	0.43	0.00144059
01/15 17:00:00	1011	-6.7	71	3.6	27																0.31	0.43	0.00138315
01/15 18:00:00	1071	-6.1	71	2.1	27																0.31	0.43	0.00142703
01/15 19:00:00	1131	-6.1	71	2.6	27																0.31	0.43	0.00141127
01/15 20:00:00	1191	-6.1	78	3.6	27																0.31	0.43	0.00134606
01/15 21:00:00	1251	-5.6	78	2.1	27																0.31	0.43	0.00118173
01/15 22:00:00	1311	-5	71	2.6	27																0.31	0.43	0.00123577
01/15 23:00:00	1371	-5	71	3.1	27																0.31	0.43	0.00138156
01/15 24:00:00	1431	-5	71	2.6	27																0.31	0.43	0.00138654
01/16 01:00:00	51	-5	74	4.1	27																0.31	0.43	0.00139522
01/16 02:00:00	111	-5	74	4.1	27																0.31	0.43	0.00138933
01/16 03:00:00	171	-5	81	4.1	27																0.31	0.43	0.00137797
01/16 04:00:00	231	-5	81	1.5	27																0.31	0.43	0.00138046
01/16 05:00:00	291	-4.4	78	3.1	27																0.31	0.43	0.00139272
01/16 06:00:00	351	-5	77	1.5	27																0.31	0.43	0.00141735
01/16 07:00:00	411	-5.6	81	1.5	27																0.31	0.43	0.00141626
01/16 08:00:00	471	-5	78	1.5	27																0.31	0.43	0.00140618
01/16 09:00:00	531	-5	78	2.6	27																0.31	0.43	0.00141097
01/16 10:00:00	591	-5	78	1.5	27																0.31	0.43	0.0014353
01/16 11:00:00	651	-4.4	78	2.6	27																0.31	0.43	0.00141556
01/16 12:00:00	711	-5	81	2.1	27																0.31	0.43	0.00141287
01/16 13:00:00	771	-5	85	2.6	27																0.31	0.43	0.00139322
01/16 14:00:00	831	-3.9	78	2.1	27																0.31	0.43	0.00140539
01/16 15:00:00	891	-3.3	78	1.5	27																0.31	0.43	0.00140339
01/16 16:00:00	951	-3.3	78	2.1	27																0.31	0.43	0.00139183
01/16 17:00:00	1011	-3.3	75	0	27																0.31	0.43	0.00140798
01/16 18:00:00	1071	-3.3	78	1.5	27																0.31	0.43	0.00139512
01/16 19:00:00	1131	-2.2	72	1.5	27																0.31	0.43	0.0014026
01/16 20:00:00	1191	-2.2	72	2.6	27																0.31	0.43	0.00139073
01/16 21:00:00	1251	-2.2	78	2.6	27																0.31	0.43	0.00139292
01/16 22:00:00	1311	-2.2	72	2.1	27																0.31	0.43	0.00138754
01/16 23:00:00	1371	-2.8	78	2.1	27																0.31	0.43	0.00139412
01/16 24:00:00	1431	-3.9	81	1.5	27																0.31	0.43	0.00137906
01/17 01:00:00	51	-2.8	81	1.5	27																0.31	0.43	0.00136999
01/17 02:00:00	111	-3.3	81	1.5	27																0.31	0.43	0.00137089
01/17 03:00:00	171	-5.6	96	0	27																0.31	0.43	0.00133997
01/17 04:00:00	231	-5.6	88	0	27																0.31	0.43	0.000965483
01/17 05:00:00	291	-5	96	1.5	27																0.31	0.43	0.00111741
01/17 06:00:00	351	-6.1	88	0	27																0.31	0.43	0.00112459
01/17 07:00:00	411	-5	92	2.1	27																0.31	0.43	0.00117873
01/17 08:00:00	471	-6.7	88	0	27																0.31	0.43	0.00122979
01/17 09:00:00	531	-7.2	88	0	27																0.31	0.43	0.00126529
01/17 10:00:00	591	-7.2	92	3.1	27																0.31	0.43	0.00125731
01/17 11:00:00	651	-6.7	96	0	27																0.31	0.43	0.00124285
01/17 12:00:00	711	-6.1	92	2.6	27																0.31	0.43	0.00126778
01/17 13:00:00	771	-6.1	92	2.1	27																0.31	0.43	0.00126479
01/17 14:00:00	831	-5.6	96	2.6	27																0.31	0.43	0.00133648
01/17 15:00:00	891	-4.4	96	1.5	27																0.31	0.43	0.00131544
01/17 16:00:00	951	-3.9	92	0	27																0.31	0.43	0.00128812
01/17 17:00:00	1011	-3.3	88	2.6	27																0.31	0.43	0.00127865
01/17 18:00:00	1071	-2.8	88	4.6	27																0.31	0.43	0.0012623
01/17 19:00:00	1131	-2.2	89	2.6	27																0.31	0.43	0.00126379
01/17 20:00:00	1191	-1.7	89	2.1	27																0.31	0.43	0.00127107
01/17 21:00:00	1251	-1.1	82	2.1	27																0.31	0.43	0.00130408
01/17 22:00:00	1311	-1.7	85	2.1	27																0.31	0.43	0.00131764
01/17 23:00:00	1371	-1.1	89	3.6	27																0.31	0.43	0.00131066
01/17 24:00:00	1431	-1.7	89	2.6	27																0.31	0.43	0.00130527
01/18 01:00:00	51	-1.7	89	2.1	27																0.31	0.43	0.00130109
01/18 02:00:00	111	-1.7	89	4.1	27																0.31	0.43	0.00130577
01/18 03:00:00	171	-1.7	89	4.1	27																0.31	0.43	0.00131375
01/18 04:00:00	231	-1.7	92	1.5	27																0.31	0.43	0.00131175
01/18 05:00:00	291	-1.1	89	1.5	27																0.31	0.43	0.00130338
01/18 06:00:00	351	-1.1	89	2.1	27																0.31	0.43	0.00128812
01/18 07:00:00	411	-1.1	89	3.6	27																0.31	0.43	0.00129919
01/18 08:00:00	471	-1.1	89	1.5	27																0.31	0.43	0.00125512
01/18 09:00:00	531	-1.1	92	2.1	27																0.31	0.43	0.00126798
01/18 10:00:00	591	-1.1	89	0	27																0.31	0.43	0.00110395
01/18 11:00:00	651	-0.6	96	2.1	27																0.31	0.43	0.00102667
01/18 12:00:00	711	0	100	3.1	27																0.31	0.43	0.000920552
01/18 13:00:00	771	1.1	92	5.2	27																0.31	0.43	0.000982694
01/18 14:00:00	831	1.7	85	3.6	27																0.31	0.43	0.00108301
01/18 15:00:00	891	0.6	89	0	27																0.31	0.43	0.00123717
01/18 16:00:00	951	0	89	2.6	27																0.31	0.43	0.00114114
01/18 17:00:00	1011	0	89	0	27																0.31	0.43	0.00105249
01/18 18:00:00	1071	0	89	2.1	27																0.31	0.43	0.00103504
01/18 19:00:00	1131	-0.6	89	2.6	27																0.31	0.43	0.00107822
01/18 20:00:00	1191	2.8	76	3.6	27																0.31	0.43	0.00108191
01/18 21:00:00	1251	3.9	67	6.2	27																0.31	0.43	0.00103704
01/18 22:00:00	1311	4.4	62	7.2	27																0.31	0.43	0.00104362
01/18 23:00:00	1371	3.9	67	5.2	27																0.31	0.43	0.00112529
01/18 24:00:00	1431	3.9	65	4.6	27																0.31	0.43	0.00106725
01/19 01:00:00	51	3.9	62	5.7	27																0.31	0.43	0.00115012
01/19 02:00:00	111	4.4	60	7.2	27																0.31	0.43	0.00119279
01/19 03:00:00	171	4.4	62	6.7	27																0.31	0.43	0.00123218
01/19 04:00:00	231	3.9	65	6.7	27																0.31	0.43	0.00121433
01/19 05:00:00	291	3.9	62	6.2	27																0.31	0.43	0.00120247
01/19 06:00:00	351	3.9	62	4.1	27																0.31	0.43	0.00120047
01/19 07:00:00	411	3.9	60	5.2	27																0.31	0.43	0.00122341
01/19 08:00:00	471	4.4	55	5.2	27																0.31	0.43	0.00118711
01/19 09:00:00	531	3.3	70	5.7	27																0.31	0.43	0.00121603
01/19 10:00:00	591	3.3	62	5.2	27																0.31	0.43	0.00121134
01/19 11:00:00	651	3.3	62	5.7	27																0.31	0.43	0.00121184
01/19 12:00:00	711	3.3	62	5.2	27																0.31	0.43	0.00123697
01/19 13:00:00	771	3.9	60	3.1	27																0.31	0.43	0.00124674
01/19 14:00:00	831	3.3	65	3.6	27																0.31	0.43	0.00124614
01/19 15:00:00	891	3.9	62	5.7	27																0.31	0.43	0.00124345
01/19 16:00:00	951	3.3	73	6.2	27																0.31	0.43	0.00124415
01/19 17:00:00	1011	2.8	79	5.2	27																0.31	0.43	0.00123657
01/19 18:00:00	1071	2.8	76	5.2	27																0.31	0.43	0.00123218
01/19 19:00:00	1131	3.3	67	5.7	27																0.31	0.43	0.00123059
01/19 20:00:00	1191	0.6	79	3.1	27																0.31	0.43	0.0012251
01/19 21:00:00	1251	0.6	82	1.5	27																0.31	0.43	0.00122949
01/19 22:00:00	1311	1.1	79	1.5	27																0.31	0.43	0.00122311
01/19 23:00:00	1371	1.7	70	3.1	27																0.31	0.43	0.00123846
01/19 24:00:00	1431	1.7	70	4.1	27																0.31	0.43	0.00123477
01/20 01:00:00	51	2.2	67	5.7	27																0.31	0.43	0.00121972
01/20 02:00:00	111	2.2	64	3.1	27																0.31	0.43	0.00121862
01/20 03:00:00	171	2.2	64	4.1	27																0.31	0.43	0.001226
01/20 04:00:00	231	2.8	59	4.1	27																0.31	0.43	0.0011911
01/20 05:00:00	291	2.8	62	5.7	27																0.31	0.43	0.000265283
01/20 06:00:00	351	2.2	64	2.1	27																0.31	0.43	0.000153522
01/20 07:00:00	411	2.2	62	4.1	27																0.31	0.43	0.000685702
01/20 08:00:00	471	-0.6	78	4.1	27																0.31	0.43	0.000378439
01/20 09:00:00	531	-1.1	82	3.6	27																0.31	0.43	0.000537246
01/20 10:00:00	591	-1.7	85	2.6	27																0.31	0.43	0.000684057
01/20 11:00:00	651	-1.1	78	2.6	27																0.31	0.43	0.000812291
01/20 12:00:00	711	-1.1	75	2.6	27																0.31	0.43	0.000971396
01/20 13:00:00	771	-1.1	78	4.6	27																0.31	0.43	0.00111063
01/20 14:00:00	831	-1.1	72	7.2	27																0.31	0.43	0.00112459
01/20 15:00:00	891	0	69	6.2	27																0.31	0.43	0.0011575
01/20 16:00:00	951	-0.6	82	4.1	27																0.31	0.43	0.00116527
01/20 17:00:00	1011	-1.1	85	3.6	27																0.31	0.43	0.00117445
01/20 18:00:00	1071	-1.1	89	3.1	27																0.31	0.43	0.00117375
01/20 19:00:00	1131	-1.1	89	4.1	27																0.31	0.43	0.00117375
01/20 20:00:00	1191	-0.6	85	2.6	27																0.31	0.43	0.00117375
01/20 21:00:00	1251	-0.6	85	2.6	27																0.31	0.43	0.00117644
01/20 22:00:00	1311	0	82	3.1	27																0.31	0.43	0.00116936
01/20 23:00:00	1371	0	75	3.1	27																0.31	0.43	0.00116797
01/20 24:00:00	1431	0	75	3.6	27																0.31	0.43	0.00117315
01/21 01:00:00	51	0.6	75	2.6	27																0.31	0.43	0.00116029
01/21 02:00:00	111	0	79	3.1	27																0.31	0.43	0.0011574
01/21 03:00:00	171	0	79	2.6	27																0.31	0.43	0.00116288
01/21 04:00:00	231	0	79	2.6	27																0.31	0.43	0.00115809
01/21 05:00:00	291	-0.6	89	2.1	27																0.31	0.43	0.00115032
01/21 06:00:00	351	-0.6	89	2.6	27																0.31	0.43	0.0011553
01/21 07:00:00	411	-0.6	89	2.1	27																0.31	0.43	0.0011559
01/21 08:00:00	471	-0.6	85	2.1	27																0.31	0.43	0.00114174
01/21 09:00:00	531	-1.1	89	1.5	27																0.31	0.43	0.00112728
01/21 10:00:00	591	-1.7	89	2.1	27																0.31	0.43	0.00112249
01/21 11:00:00	651	-1.1	85	3.6	27																0.31	0.43	0.00108789
01/21 12:00:00	711	-1.1	85	4.1	27																0.31	0.43	0.00110265
01/21 13:00:00	771	-1.1	89	2.1	27																0.31	0.43	0.00109218
01/21 14:00:00	831	-1.1	89	1.5	27																0.31	0.43	0.0010844
01/21 15:00:00	891	-1.1	89	2.6	27																0.31	0.43	0.00109408
01/21 16:00:00	951	-0.6	85	0	27																0.31	0.43	0.00109009
01/21 17:00:00	1011	2.8	76	5.2	27																0.31	0.43	0.00107114
01/21 18:00:00	1071	3.3	44	8.2	27																0.31	0.43	0.00108819
01/21 19:00:00	1131	2.8	48	5.2	27																0.31	0.43	0.00110893
01/21 20:00:00	1191	2.2	44	4.6	27																0.31	0.43	0.0010874
01/21 21:00:00	1251	0.6	61	5.7	27																0.31	0.43	0.00106945
01/21 22:00:00	1311	-0.6	75	3.6	27																0.31	0.43	0.00108121
01/21 23:00:00	1371	-1.1	69	3.6	27																0.31	0.43	0.00108251
01/21 24:00:00	1431	-1.1	72	3.1	27																0.31	0.43	0.00106267
01/22 01:00:00	51	-0.6	69	4.1	27																0.31	0.43	0.00107513
01/22 02:00:00	111	-1.1	72	2.1	27																0.31	0.43	0.0010515
01/22 03:00:00	171	-1.1	72	4.1	27																0.31	0.43	0.00109428
01/22 04:00:00	231	-1.1	85	6.2	27																0.31	0.43	0.00108281
01/22 05:00:00	291	-2.2	89	3.1	27																0.31	0.43	0.00107902
01/22 06:00:00	351	-2.2	89	5.2	27																0.31	0.43	0.0010518
01/22 07:00:00	411	-2.8	85	4.1	27																0.31	0.43	0.00105289
01/22 08:00:00	471	-5.6	85	2.1	27																0.31	0.43	0.0010503
01/22 09:00:00	531	-4.4	84	0	27																0.31	0.43	0.00102388
01/22 10:00:00	591	-3.9	92	1.5	27																0.31	0.43	0.00100573
01/22 11:00:00	651	-3.9	96	0	27																0.31	0.43	0.000900987
01/22 12:00:00	711	-3.3	92	0	27																0.31	0.43	0.000892681
01/22 13:00:00	771	-2.8	88	0	27																0.31	0.43	0.000829791
01/22 14:00:00	831	-2.8	88	0	27																0.31	0.43	0.000849405
01/22 15:00:00	891	-3.3	92	0	27																0.31	0.43	0.000820248
01/22 16:00:00	951	-2.8	88	0	27																0.31	0.43	0.000902613
01/22 17:00:00	1011	-2.8	88	1.5	27																0.31	0.43	0.000859426
01/22 18:00:00	1071	-3.3	92	2.1	27																0.31	0.43	0.0009948
01/22 19:00:00	1131	-2.8	88	2.6	27																0.31	0.43	0.000948861
01/22 20:00:00	1191	-3.3	88	2.6	27																0.31	0.43	0.000670795
01/22 21:00:00	1251	-3.3	85	2.1	27																0.31	0.43	0.000932398
01/22 22:00:00	1311	-3.9	85	1	27																0.31	0.43	0.00096659
01/22 23:00:00	1371	-4.4	88	0	27																0.31	0.43	0.000931151
01/22 24:00:00	1431	-4.4	88	0	27																0.31	0.43	0.000981847
01/23 01:00:00	51	-3.9	85	2.1	27																0.31	0.43	0.000847371
01/23 02:00:00	111	-3.9	88	2.1	27																0.31	0.43	0.000926654
01/23 03:00:00	171	-3.9	85	3.1	27																0.31	0.43	0.000913402
01/23 04:00:00	231	-3.9	85	3.6	27																0.31	0.43	0.000921289
01/23 05:00:00	291	-3.9	85	3.6	27																0.31	0.43	0.000891714
01/23 06:00:00	351	-4.4	85	3.6	27																0.31	0.43	0.000953777
01/23 07:00:00	411	-5	85	1.5	27																0.31	0.43	0.00093146
01/23 08:00:00	471	-6.1	88	2.6	27																0.31	0.43	0.00100034
01/23 09:00:00	531	-7.2	81	1.5	27																0.31	0.43	0.000969572
01/23 10:00:00	591	-6.7	92	5.2	27																0.31	0.43	0.00100633
01/23 11:00:00	651	-6.1	92	1.5	27																0.31	0.43	0.000996166
01/23 12:00:00	711	-6.1	88	0	27																0.31	0.43	0.000998449
01/23 13:00:00	771	-6.1	92	1.5	27																0.31	0.43	0.00101281
01/23 14:00:00	831	-6.1	88	0	27																0.31	0.43	0.00100722
01/23 15:00:00	891	-6.1	84	0	27																0.31	0.43	0.000994191
01/23 16:00:00	951	-5	88	2.6	27																0.31	0.43	0.00100244
01/23 17:00:00	1011	-5	85	2.1	27																0.31	0.43	0.000983502
01/23 18:00:00	1071	-5	85	3.1	27																0.31	0.43	0.00101361
01/23 19:00:00	1131	-5.6	81	3.1	27																0.31	0.43	0.0010158
01/23 20:00:00	1191	-6.7	84	2.1	27																0.31	0.43	0.000988876
01/23 21:00:00	1251	-8.3	84	3.1	27																0.31	0.43	0.000989345
01/23 22:00:00	1311	-8.9	88	2.6	27																0.31	0.43	0.000983153
01/23 23:00:00	1371	-8.9	84	1.5	27																0.31	0.43	0.000891175
01/23 24:00:00	1431	-8.9	84	1.5	27																0.31	0.43	0.000972154
01/24 01:00:00	51	-8.9	84	1.5	27																0.31	0.43	0.00096651
01/24 02:00:00	111	-9.4	84	2.1	27																0.31	0.43	0.000962113
01/24 03:00:00	171	-9.4	84	2.1	27																0.31	0.43	0.000848697
01/24 04:00:00	231	-9.4	84	4.6	27																0.31	0.43	0.000910401
01/24 05:00:00	291	-9.4	84	3.1	27																0.31	0.43	0.000970399
01/24 06:00:00	351	-9.4	80	2.6	27																0.31	0.43	0.000988837
01/24 07:00:00	411	-9.4	80	2.1	27																0.31	0.43	0.000989136
01/24 08:00:00	471	-9.4	84	2.1	27																0.31	0.43	0.000988886
01/24 09:00:00	531	-9.4	84	2.1	27																0.31	0.43	0.000985347
01/24 10:00:00	591	-9.4	88	2.6	27																0.31	0.43	0.00098398
01/24 11:00:00	651	-9.4	92	3.1	27																0.31	0.43	0.000991659
01/24 12:00:00	711	-8.9	92	2.6	27																0.31	0.43	0.000997651
01/24 13:00:00	771	-8.3	92	2.1	27																0.31	0.43	0.000976372
01/24 14:00:00	831	-8.3	92	2.6	27																0.31	0.43	0.000960498
01/24 15:00:00	891	-7.8	92	2.6	27																0.31	0.43	0.000846583
01/24 16:00:00	951	-6.7	84	2.6	27																0.31	0.43	0.000912854
01/24 17:00:00	1011	-6.7	84	3.1	27																0.31	0.43	0.000956469
01/24 18:00:00	1071	-6.7	84	3.1	27																0.31	0.43	0.000946856
01/24 19:00:00	1131	-6.7	88	3.6	27																0.31	0.43	0.000964795
01/24 20:00:00	1191	-6.7	88	2.1	27																0.31	0.43	0.000951154
01/24 21:00:00	1251	-6.7	92	2.1	27																0.31	0.43	0.000964107
01/24 22:00:00	1311	-6.1	92	3.6	27																0.31	0.43	0.000954485
01/24 23:00:00	1371	-6.1	92	4.1	27																0.31	0.43	0.000937742
01/24 24:00:00	1431	-6.1	92	2.6	27																0.31	0.43	0.000924231
01/25 01:00:00	51	-6.1	88	3.1	27																0.31	0.43	0.000950057
01/25 02:00:00	111	-6.1	84	3.1	27																0.31	0.43	0.000953428
01/25 03:00:00	171	-6.1	88	2.6	27																0.31	0.43	0.000949658
01/25 04:00:00	231	-5.6	92	3.1	27																0.31	0.43	0.000933893
01/25 05:00:00	291	-5.6	92	3.1	27																0.31	0.43	0.000936895
01/25 06:00:00	351	-5.6	96	3.6	27																0.31	0.43	0.000906023
01/25 07:00:00	411	-5	88	3.6	27																0.31	0.43	0.000929795
01/25 08:00:00	471	-3.9	81	2.6	27																0.31	0.43	0.000926624
01/25 09:00:00	531	-3.9	81	2.6	27																0.31	0.43	0.000930393
01/25 10:00:00	591	-3.3	75	4.1	27																0.31	0.43	0.000941542
01/25 11:00:00	651	-3.3	78	2.6	27																0.31	0.43	0.000904936
01/25 12:00:00	711	-2.8	78	3.1	27																0.31	0.43	0.000908027
01/25 13:00:00	771	-2.2	75	4.6	27																0.31	0.43	0.000919654
01/25 14:00:00	831	-2.2	75	5.7	27																0.31	0.43	0.000931889
01/25 15:00:00	891	-1.7	75	5.2	27																0.31	0.43	0.000921299
01/25 16:00:00	951	-2.2	75	3.1	27																0.31	0.43	0.000923204
01/25 17:00:00	1011	-3.3	78	2.6	27																0.31	0.43	0.000906222
01/25 18:00:00	1071	-3.9	81	1.5	27																0.31	0.43	0.000870784
01/25 19:00:00	1131	-5	85	2.6	27																0.31	0.43	0.000848876
01/25 20:00:00	1191	-3.9	81	3.6	27																0.31	0.43	0.000811254
01/25 21:00:00	1251	-3.9	81	3.1	27																0.31	0.43	0.000760359
01/25 22:00:00	1311	-3.9	81	5.2	27																0.31	0.43	0.000663765
01/25 23:00:00	1371	-2.8	75	4.1	27																0.31	0.43	0.000715756
01/25 24:00:00	1431	-2.8	75	5.7	27																0.31	0.43	0.000547148
01/26 01:00:00	51	-2.8	72	4.1	27																0.31	0.43	0.000740486
01/26 02:00:00	111	-4.4	78	2.1	27																0.31	0.43	0.000597624
01/26 03:00:00	171	-3.9	78	2.1	27																0.31	0.43	0.000666008
01/26 04:00:00	231	-3.3	81	1.5	27																0.31	0.43	0.000686929
01/26 05:00:00	291	-3.9	78	2.1	27																0.31	0.43	0.000842165
01/26 06:00:00	351	-3.9	78	0	27																0.31	0.43	0.000814764
01/26 07:00:00	411	-3.9	78	0	27																0.31	0.43	0.000773372
01/26 08:00:00	471	-3.3	78	0	27																0.31	0.43	0.000636722
01/26 09:00:00	531	-3.3	78	2.6	27																0.31	0.43	0.000650313
01/26 10:00:00	591	-2.8	81	2.6	27																0.31	0.43	0.000702305
01/26 11:00:00	651	-2.2	82	0	27																0.31	0.43	0.000622891
01/26 12:00:00	711	-2.2	85	0	27																0.31	0.43	0.000666178
01/26 13:00:00	771	-1.1	78	0	27																0.31	0.43	0.000686969
01/26 14:00:00	831	-1.1	85	3.1	27																0.31	0.43	0.000626551
01/26 15:00:00	891	-0.6	78	3.6	27																0.31	0.43	0.000624706
01/26 16:00:00	951	-0.6	75	3.1	27																0.31	0.43	0.000676429
01/26 17:00:00	1011	-1.1	78	3.6	27																0.31	0.43	0.000574819
01/26 18:00:00	1071	-1.7	75	3.1	27																0.31	0.43	0.000728091
01/26 19:00:00	1131	-2.2	82	2.1	27																0.31	0.43	0.000591022
01/26 20:00:00	1191	-1.7	82	4.1	27																0.31	0.43	0.000736667
01/26 21:00:00	1251	-1.7	78	2.1	27																0.31	0.43	0.000742021
01/26 22:00:00	1311	-1.7	72	2.6	27																0.31	0.43	0.000778268
01/26 23:00:00	1371	-1.7	66	1.5	27																0.31	0.43	0.000698266
01/26 24:00:00	1431	-2.2	75	3.1	27																0.31	0.43	0.000742919
01/27 01:00:00	51	-5	81	2.1	27																0.31	0.43	0.000719446
01/27 02:00:00	111	-5.6	85	0	27																0.31	0.43	0.000709075
01/27 03:00:00	171	-5	85	1.5	27																0.31	0.43	0.000701308
01/27 04:00:00	231	-5	88	1.5	27																0.31	0.43	0.000785178
01/27 05:00:00	291	-5	85	0	27																0.31	0.43	0.000588001
01/27 06:00:00	351	-3.9	85	0	27																0.31	0.43	0.0005497
01/27 07:00:00	411	-3.9	92	1.5	27																0.31	0.43	0.00043087
01/27 08:00:00	471	-1.7	100	2.1	27																0.31	0.43	0.000408045
01/27 09:00:00	531	-1.1	100	0	27																0.31	0.43	0.000300003
01/27 10:00:00	591	-1.1	92	2.6	27																0.31	0.43	0.000247703
01/27 11:00:00	651	1.7	89	3.6	27																0.31	0.43	0.000143391
01/27 12:00:00	711	1.7	92	4.6	27																0.31	0.43	0.000250126
01/27 13:00:00	771	1.7	92	5.2	27																0.31	0.43	0.00016096
01/27 14:00:00	831	2.2	89	7.7	27																0.31	0.43	0.000162915
01/27 15:00:00	891	2.2	89	6.2	27																0.31	0.43	0.000200009
01/27 16:00:00	951	2.2	89	5.2	27																0.31	0.43	0.000397734
01/27 17:00:00	1011	2.2	89	6.7	27																0.31	0.43	0.000470467
01/27 18:00:00	1071	2.2	89	4.6	27																0.31	0.43	0.000370891
01/27 19:00:00	1131	2.2	89	5.7	27																0.31	0.43	0.000404166
01/27 20:00:00	1191	2.2	82	5.7	27																0.31	0.43	0.000277548
01/27 21:00:00	1251	2.2	79	4.1	27																0.31	0.43	0.000284976
01/27 22:00:00	1311	2.2	76	2.1	27																0.31	0.43	0.000367162
01/27 23:00:00	1371	1.1	82	3.1	27																0.31	0.43	0.000194056
01/27 24:00:00	1431	0	92	4.1	27																0.31	0.43	0.000370063
01/28 01:00:00	51	-1.1	92	2.1	27																0.31	0.43	0.000273449
01/28 02:00:00	111	2.2	64	3.6	27																0.31	0.43	0.000492554
01/28 03:00:00	171	2.2	64	7.2	27																0.31	0.43	0.000146841
01/28 04:00:00	231	1.7	67	6.2	27																0.31	0.43	0.000482403
01/28 05:00:00	291	1.7	67	3.6	27																0.31	0.43	0.000268144
01/28 06:00:00	351	1.7	64	4.6	27																0.31	0.43	0.000342642
01/28 07:00:00	411	-1.7	85	4.1	27																0.31	0.43	0.000422902
01/28 08:00:00	471	-1.1	75	3.6	27																0.31	0.43	0.000340199
01/28 09:00:00	531	-1.7	78	0	27																0.31	0.43	0.000327276
01/28 10:00:00	591	-2.8	85	3.1	27																0.31	0.43	0.000269899
01/28 11:00:00	651	-3.3	85	2.1	27																0.31	0.43	0.000459697
01/28 12:00:00	711	-3.3	88	3.1	27																0.31	0.43	0.000372786
01/28 13:00:00	771	-2.2	82	3.1	27																0.31	0.43	0.000419462
01/28 14:00:00	831	-2.8	85	4.1	27																0.31	0.43	0.000459887
01/28 15:00:00	891	-3.3	88	4.6	27																0.31	0.43	0.000440482
01/28 16:00:00	951	-3.3	88	4.1	27																0.31	0.43	0.000503592
01/28 17:00:00	1011	-3.3	88	4.1	27																0.31	0.43	0.000457294
01/28 18:00:00	1071	-3.9	88	1.5	27																0.31	0.43	0.000502306
01/28 19:00:00	1131	-3.9	88	5.2	27																0.31	0.43	0.000501319
01/28 20:00:00	1191	-3.3	85	4.1	27																0.31	0.43	0.00050097
01/28 21:00:00	1251	-2.2	89	5.7	27																0.31	0.43	0.000650243
01/28 22:00:00	1311	-0.6	75	6.2	27																0.31	0.43	0.000684266
01/28 23:00:00	1371	-0.6	72	3.1	27																0.31	0.43	0.000632803
01/28 24:00:00	1431	1.7	79	7.2	27																0.31	0.43	0.000711937
01/29 01:00:00	51	1.1	79	5.7	27																0.31	0.43	0.000685692
01/29 02:00:00	111	1.7	76	2.6	27																0.31	0.43	0.000604753
01/29 03:00:00	171	1.1	76	3.6	27																0.31	0.43	0.000573652
01/29 04:00:00	231	-1.7	85	3.1	27																0.31	0.43	0.000588191
01/29 05:00:00	291	-2.2	89	5.2	27																0.31	0.43	0.000570282
01/29 06:00:00	351	-1.1	82	4.6	27																0.31	0.43	0.000636822
01/29 07:00:00	411	-1.7	89	3.1	27																0.31	0.43	0.000613339
01/29 08:00:00	471	-2.2	89	4.1	27																0.31	0.43	0.000636333
01/29 09:00:00	531	-1.7	89	1.5	27																0.31	0.43	0.000602958
01/29 10:00:00	591	2.2	79	8.8	27																0.31	0.43	0.000711349
01/29 11:00:00	651	1.7	82	5.2	27																0.31	0.43	0.000690209
01/29 12:00:00	711	2.2	79	8.2	27																0.31	0.43	0.000666746
01/29 13:00:00	771	2.8	73	3.1	27																0.31	0.43	0.000735221
01/29 14:00:00	831	2.8	73	1.5	27																0.31	0.43	0.000686211
01/29 15:00:00	891	2.8	76	4.6	27																0.31	0.43	0.000748692
01/29 16:00:00	951	2.2	73	0	27																0.31	0.43	0.000737175
01/29 17:00:00	1011	1.1	76	0	27																0.31	0.43	0.000732528
01/29 18:00:00	1071	0	85	2.6	27																0.31	0.43	0.000746927
01/29 19:00:00	1131	0	85	3.6	27																0.31	0.43	0.000730185
01/29 20:00:00	1191	2.8	79	5.2	27																0.31	0.43	0.000751434
01/29 21:00:00	1251	2.2	82	3.6	27																0.31	0.43	0.000748882
01/29 22:00:00	1311	2.2	79	2.6	27																0.31	0.43	0.000735181
01/29 23:00:00	1371	0.6	89	2.1	27																0.31	0.43	0.000751953
01/29 24:00:00	1431	0.6	89	6.2	27																0.31	0.43	0.00074962
01/30 01:00:00	51	1.1	85	5.2	27																0.31	0.43	0.000746708
01/30 02:00:00	111	1.1	82	4.1	27																0.31	0.43	0.000737604
01/30 03:00:00	171	1.1	85	4.1	27																0.31	0.43	0.000736766
01/30 04:00:00	231	0.6	92	3.1	27																0.31	0.43	0.000736467
01/30 05:00:00	291	1.1	89	1.5	27																0.31	0.43	0.000733226
01/30 06:00:00	351	1.1	92	6.7	27																0.31	0.43	0.000742301
01/30 07:00:00	411	1.7	89	6.2	27																0.31	0.43	0.000725977
01/30 08:00:00	471	3.3	82	6.2	27																0.31	0.43	0.000732329
01/30 09:00:00	531	1.7	89	7.2	27																0.31	0.43	0.0007213
01/30 10:00:00	591	1.7	70	12.9	27																0.31	0.43	0.000679799
01/30 11:00:00	651	1.7	64	8.8	27																0.31	0.43	0.000710491
01/30 12:00:00	711	1.1	64	11.3	27																0.31	0.43	0.000725459
01/30 13:00:00	771	0	67	8.8	27																0.31	0.43	0.000724781
01/30 14:00:00	831	0.6	61	8.8	27																0.31	0.43	0.000717671
01/30 15:00:00	891	0.6	61	6.2	27																0.31	0.43	0.000717093
01/30 16:00:00	951	1.1	50	6.2	27																0.31	0.43	0.000720722
01/30 17:00:00	1011	0.6	54	5.2	27																0.31	0.43	0.000716724
01/30 18:00:00	1071	-0.6	59	2.6	27																0.31	0.43	0.000715567
01/30 19:00:00	1131	-0.6	61	3.1	27																0.31	0.43	0.000718628
01/30 20:00:00	1191	-0.6	59	3.6	27																0.31	0.43	0.000706154
01/30 21:00:00	1251	1.1	57	6.7	27																0.31	0.43	0.000709265
01/30 22:00:00	1311	1.1	57	5.2	27																0.31	0.43	0.000701367
01/30 23:00:00	1371	1.1	57	3.6	27																0.31	0.43	0.000712187
01/30 24:00:00	1431	0	61	3.1	27																0.31	0.43	0.000686819
01/31 01:00:00	51	-0.6	69	2.1	27																0.31	0.43	0.00069697
01/31 02:00:00	111	0	69	4.1	27																0.31	0.43	0.000699752
01/31 03:00:00	171	1.1	67	5.2	27																0.31	0.43	0.000687736
01/31 04:00:00	231	1.1	73	6.7	27																0.31	0.43	0.000693101
01/31 05:00:00	291	0.6	75	3.6	27																0.31	0.43	0.000688614
01/31 06:00:00	351	-1.1	85	1.5	27																0.31	0.43	0.000695544
01/31 07:00:00	411	-1.1	89	1.5	27																0.31	0.43	0.000694377
01/31 08:00:00	471	-1.1	92	1.5	27																0.31	0.43	0.000691077
01/31 09:00:00	531	-1.1	92	1.5	27																0.31	0.43	0.000691875
01/31 10:00:00	591	-1.1	96	1.5	27																0.31	0.43	0.000684326
01/31 11:00:00	651	-1.1	96	1.5	27																0.31	0.43	0.000688584
01/31 12:00:00	711	-0.6	92	1.5	27																0.31	0.43	0.000685403
01/31 13:00:00	771	-0.6	96	2.1	27																0.31	0.43	0.000685912
01/31 14:00:00	831	-0.6	92	1.5	27																0.31	0.43	0.000674205
01/31 15:00:00	891	-0.6	92	1.5	27																0.31	0.43	0.000678214
01/31 16:00:00	951	-0.6	92	0	27																0.31	0.43	0.000680397
01/31 17:00:00	1011	-1.1	96	0	27																0.31	0.43	0.000680078
01/31 18:00:00	1071	-1.1	96	0	27																0.31	0.43	0.000673048
01/31 19:00:00	1131	-1.1	96	0	27																0.31	0.43	0.000669808
01/31 20:00:00	1191	-1.1	96	2.6	27																0.31	0.43	0.000674434
01/31 21:00:00	1251	-1.1	96	1.5	27																0.31	0.43	0.000669788
01/31 22:00:00	1311	-4.4	92	1.5	27																0.31	0.43	0.000669847
01/31 23:00:00	1371	-7.8	92	1.5	27																0.31	0.43	0.000670087
01/31 24:00:00	1431	-11.2	88	1.5	27																0.31	0.43	0.000663356
2015-02-01 00:51:00	51	-14.7	67	1.5	27																0.98	1.48	0.000666427
2015-02-01 01:51:00	111	-18.1	67	1.5	27																0.98	1.48	0.000662628
2015-02-01 02:51:00	171	-21.5	61	1.5	27																0.98	1.48	0.000645298
2015-02-01 03:51:00	231	-25	67	1.5	27																0.98	1.48	0.00065507
2015-02-01 04:51:00	291	-23.3	61	1	27																0.98	1.48	0.000660853
2015-02-01 05:51:00	351	-24.4	70	1.5	27																0.98	1.48	0.000657084
2015-02-01 06:51:00	411	-23.9	67	2.1	27																0.98	1.48	0.000652766
2015-02-01 07:51:00	471	-21.7	64	2.6	27																0.98	1.48	0.000653345
2015-02-01 08:51:00	531	-22.8	71	3.1	27																0.98	1.48	0.000649326
2015-02-01 09:51:00	591	-18.9	68	2.6	27																0.98	1.48	0.000647342
2015-02-01 10:51:00	651	-21.1	71	1	27																0.98	1.48	0.000644619
2015-02-01 11:51:00	711	-18.3	72	1.5	27																0.98	1.48	0.000646624
2015-02-01 12:51:00	771	-16.7	76	4.1	27																0.98	1.48	0.00064457
2015-02-01 13:51:00	831	-16.7	79	1.5	27																0.98	1.48	0.000642984
2015-02-01 14:51:00	891	-15.6	66	2.1	27																0.98	1.48	0.000636363
2015-02-01 15:51:00	951	-17.2	59	3.6	27																0.98	1.48	0.000616988
2015-02-01 16:51:00	1011	-17.2	59	2.6	27																0.98	1.48	0.00063404
2015-02-01 17:51:00	1071	-18.9	68	2.1	27																0.98	1.48	0.000619441
2015-02-01 18:51:00	1131	-22.2	75	1.5	27																0.98	1.48	0.000630859
2015-02-01 19:51:00	1191	-19.4	68	2.6	27																0.98	1.48	0.000620618
2015-02-01 20:51:00	1251	-22.2	67	0	27																0.98	1.48	0.000630161
2015-02-01 21:51:00	1311	-23.9	70	2.6	27																0.98	1.48	0.000627339
2015-02-01 22:51:00	1371	-24.4	67	1.5	27																0.98	1.48	0.000615373
2015-02-01 23:51:00	1431	-23.3	67	2.1	27																0.98	1.48	0.000618554
2015-02-02 00:51:00	51	-23.3	64	1.5	27																0.98	1.48	0.000617676
2015-02-02 01:51:00	111	-24.4	67	1	27																0.98	1.48	0.000584591
2015-02-02 02:51:00	171	-23.9	67	1.5	27																0.98	1.48	0.000602968
2015-02-02 03:51:00	231	-24.4	70	2.1	27																0.98	1.48	0.000614854
2015-02-02 04:51:00	291	-21.1	68	0	27																0.98	1.48	0.000613608
2015-02-02 05:51:00	351	-22.2	71	1	27																0.98	1.48	0.000601911
2015-02-02 06:51:00	411	-22.2	71	1.5	27																0.98	1.48	0.00061981
2015-02-02 07:51:00	471	-20.6	71	1.5	27																0.98	1.48	0.000590833
2015-02-02 08:51:00	531	-20.6	71	1	27																0.98	1.48	0.00061296
2015-02-02 09:51:00	591	-20.6	75	1	27																0.98	1.48	0.000602619
2015-02-02 10:51:00	651	-19.4	79	2.1	27																0.98	1.48	0.000601493
2015-02-02 11:51:00	711	-17.2	83	2.6	27																0.98	1.48	0.000603018
2015-02-02 12:51:00	771	-15.6	80	0	27																0.98	1.48	0.00059552
2015-02-02 13:51:00	831	-14.4	76	2.6	27																0.98	1.48	0.000579176
2015-02-02 14:51:00	891	-12.8	70	3.6	27																0.98	1.48	0.000587722
2015-02-02 15:51:00	951	-12.8	70	4.1	27																0.98	1.48	0.000596437
2015-02-02 16:51:00	1011	-14.4	63	2.6	27																0.98	1.48	0.000576873
2015-02-02 17:51:00	1071	-17.2	72	1.5	27																0.98	1.48	0.000591611
2015-02-02 18:51:00	1131	-19.4	72	2.1	27																0.98	1.48	0.000552522
2015-02-02 19:51:00	1191	-16.7	76	1.5	27																0.98	1.48	0.000565356
2015-02-02 20:51:00	1251	-19.4	68	1.5	27																0.98	1.48	0.000591481
2015-02-02 21:51:00	1311	-18.9	72	1.5	27																0.98	1.48	0.000577541
2015-02-02 22:51:00	1371	-17.2	72	3.6	27																0.98	1.48	0.000554148
2015-02-02 23:51:00	1431	-15.6	63	1	27																0.98	1.48	0.000586675
2015-02-03 00:51:00	51	-16.7	60	4.1	27																0.98	1.48	0.000579585
2015-02-03 01:51:00	111	-17.2	56	2.6	27																0.98	1.48	0.000509126
2015-02-03 02:51:00	171	-16.7	49	2.6	27																0.98	1.48	0.000538114
2015-02-03 03:51:00	231	-17.8	51	3.1	27																0.98	1.48	0.000519188
2015-02-03 04:51:00	291	-18.3	48	2.6	27																0.98	1.48	0.000501797
2015-02-03 05:51:00	351	-18.9	65	2.6	27																0.98	1.48	0.000576873
2015-02-03 06:51:00	411	-21.1	64	1.5	27																0.98	1.48	0.000501478
2015-02-03 07:51:00	471	-21.7	64	2.1	27																0.98	1.48	0.000506274
2015-02-03 08:51:00	531	-21.1	68	1.5	27																0.98	1.48	0.000484387
2015-02-03 09:51:00	591	-20.6	65	0	27																0.98	1.48	0.000495545
2015-02-03 10:51:00	651	-18.3	68	1.5	27																0.98	1.48	0.000467495
2015-02-03 11:51:00	711	-16.1	69	6.2	27																0.98	1.48	0.000465042
2015-02-03 12:51:00	771	-14.4	73	2.6	27																0.98	1.48	0.000466319
2015-02-03 13:51:00	831	-14.4	69	3.6	27																0.98	1.48	0.000504998
2015-02-03 14:51:00	891	-12.8	55	3.1	27																0.98	1.48	0.000396787
2015-02-03 15:51:00	951	-12.8	43	2.6	27																0.98	1.48	0.000481665
2015-02-03 16:51:00	1011	-12.8	43	1.5	27																0.98	1.48	0.000414467
2015-02-03 17:51:00	1071	-17.2	62	2.1	27																0.98	1.48	0.000411605
2015-02-03 18:51:00	1131	-19.4	68	2.6	27																0.98	1.48	0.000477626
2015-02-03 19:51:00	1191	-18.3	68	3.1	27																0.98	1.48	0.000330596
2015-02-03 20:51:00	1251	-21.7	71	2.1	27																0.98	1.48	0.000412393
2015-02-03 21:51:00	1311	-21.1	71	2.6	27																0.98	1.48	0.000267736
2015-02-03 22:51:00	1371	-22.8	67	2.1	27																0.98	1.48	0.000298996
2015-02-03 23:51:00	1431	-23.3	71	2.1	27																0.98	1.48	0.000249159
2015-02-04 00:51:00	51	-21.7	68	2.1	27																0.98	1.48	0.000200787
2015-02-04 01:51:00	111	-20.6	68	0	27																0.98	1.48	7.93913e-05
2015-02-04 02:51:00	171	-21.1	61	2.1	27																0.98	1.48	0.000216911
2015-02-04 03:51:00	231	-21.1	71	1.5	27																0.98	1.48	0.000112848
2015-02-04 04:51:00	291	-21.1	68	1.5	27																0.98	1.48	0.000141486
2015-02-04 05:51:00	351	-21.7	68	1	27																0.98	1.48	0.000185331
2015-02-04 06:51:00	411	-19.4	72	1	27																0.98	1.48	8.14534e-05
2015-02-04 07:51:00	471	-20.6	75	2.6	27																0.98	1.48	0.000127805
2015-02-04 08:51:00	531	-20.6	71	1.5	27																0.98	1.48	0.000108391
2015-02-04 09:51:00	591	-21.1	68	0	27																0.98	1.48	0.000143869
2015-02-04 10:51:00	651	-19.4	79	0	27																0.98	1.48	5.14421e-05
2015-02-04 11:51:00	711	-16.7	83	2.1	27																0.98	1.48	0.000156802
2015-02-04 12:51:00	771	-16.7	79	2.1	27																0.98	1.48	9.89415e-05
2015-02-04 13:51:00	831	-15.6	80	2.6	27																0.98	1.48	0.000105608
2015-02-04 14:51:00	891	-13.9	73	1.5	27																0.98	1.48	7.03731e-05
2015-02-04 15:51:00	951	-13.3	73	0	27																0.98	1.48	0.000294758
2015-02-04 16:51:00	1011	-17.2	76	2.1	27																0.98	1.48	0.000233443
2015-02-04 17:51:00	1071	-18.9	75	1.5	27																0.98	1.48	0.000152874
2015-02-04 18:51:00	1131	-17.8	69	1.5	27																0.98	1.48	4.16212e-05
2015-02-04 19:51:00	1191	-19.4	75	2.1	27																0.98	1.48	1.5418e-05
2015-02-04 20:51:00	1251	-20	71	2.1	27																0.98	1.48	0.000128393
2015-02-04 21:51:00	1311	-21.1	75	1.5	27																0.98	1.48	0.00028703
2015-02-04 22:51:00	1371	-20.6	68	2.1	27																0.98	1.48	0.000202711
2015-02-04 23:51:00	1431	-19.4	68	2.6	27																0.98	1.48	0.00029765
2015-02-05 00:51:00	51	-20.6	68	1.5	27																0.98	1.48	0.000255261
2015-02-05 01:51:00	111	-20.6	68	1.5	27																0.98	1.48	0.000192819
2015-02-05 02:51:00	171	-20	71	0	27																0.98	1.48	0.00022415
2015-02-05 03:51:00	231	-21.1	71	0	27																0.98	1.48	0.000310942
2015-02-05 04:51:00	291	-20.6	71	0	27																0.98	1.48	0.000112938
2015-02-05 05:51:00	351	-19.4	72	3.1	27																0.98	1.48	0.000145624
2015-02-05 06:51:00	411	-21.1	71	0	27																0.98	1.48	0.000157191
2015-02-05 07:51:00	471	-20	71	0	27																0.98	1.48	5.90075e-05
2015-02-05 08:51:00	531	-20	71	0	27																0.98	1.48	0.000270358
2015-02-05 09:51:00	591	-17.8	69	1.5	27																0.98	1.48	0.000217918
2015-02-05 10:51:00	651	-15	76	2.1	27																0.98	1.48	0.000121294
2015-02-05 11:51:00	711	-14.4	80	2.1	27																0.98	1.48	0.000202821
2015-02-05 12:51:00	771	-12.8	76	2.1	27																0.98	1.48	0.000246915
2015-02-05 13:51:00	831	-12.8	80	2.1	27																0.98	1.48	0.000237442
2015-02-05 14:51:00	891	-11.7	73	2.1	27																0.98	1.48	0.000142074
2015-02-05 15:51:00	951	-11.1	73	2.6	27																0.98	1.48	0.000312268
2015-02-05 16:51:00	1011	-12.2	73	1.5	27																0.98	1.48	0.0002801
2015-02-05 17:51:00	1071	-16.1	72	2.1	27																0.98	1.48	0.000313684
2015-02-05 18:51:00	1131	-18.3	79	1.5	27																0.98	1.48	0.000310823
2015-02-05 19:51:00	1191	-18.3	72	2.1	27																0.98	1.48	0.000335971
2015-02-05 20:51:00	1251	-18.3	72	0	27																0.98	1.48	0.000285664
2015-02-05 21:51:00	1311	-15	73	2.6	27																0.98	1.48	0.000346541
2015-02-05 22:51:00	1371	-17.2	76	0	27																0.98	1.48	0.000349023
2015-02-05 23:51:00	1431	-18.3	79	0	27																0.98	1.48	0.000467236
2015-02-06 00:51:00	51	-16.7	72	0	27																0.98	1.48	0.000400736
2015-02-06 01:51:00	111	-16.1	76	0	27																0.98	1.48	0.000387494
2015-02-06 02:51:00	171	-14.4	66	0	27																0.98	1.48	0.000373872
2015-02-06 03:51:00	231	-16.1	76	0	27																0.98	1.48	0.000408793
2015-02-06 04:51:00	291	-15.6	72	0	27																0.98	1.48	0.000418346
2015-02-06 05:51:00	351	-16.7	76	2.1	27																0.98	1.48	0.000421895
2015-02-06 06:51:00	411	-17.8	83	1.5	27																0.98	1.48	0.000457424
2015-02-06 07:51:00	471	-12.8	76	1.5	27																0.98	1.48	0.000447034
2015-02-06 08:51:00	531	-13.3	73	2.1	27																0.98	1.48	0.000453535
2015-02-06 09:51:00	591	-13.9	80	1.5	27																0.98	1.48	0.000455121
2015-02-06 10:51:00	651	-14.4	80	2.6	27																0.98	1.48	0.000335961
2015-02-06 11:51:00	711	-11.1	84	1.5	27																0.98	1.48	0.000451112
2015-02-06 12:51:00	771	-9.4	84	2.6	27																0.98	1.48	0.000475433
2015-02-06 13:51:00	831	-8.9	84	3.6	27																0.98	1.48	0.000471005
2015-02-06 14:51:00	891	-8.3	84	3.6	27																0.98	1.48	0.000358975
2015-02-06 15:51:00	951	-8.3	81	2.1	27																0.98	1.48	0.000482333
2015-02-06 16:51:00	1011	-8.3	77	1.5	27																0.98	1.48	0.000439435
2015-02-06 17:51:00	1071	-8.3	77	3.6	27																0.98	1.48	0.000453844
2015-02-06 18:51:00	1131	-10.6	73	3.6	27																0.98	1.48	0.00032226
2015-02-06 19:51:00	1191	-11.7	73	3.1	27																0.98	1.48	0.000437451
2015-02-06 20:51:00	1251	-10	67	3.1	27																0.98	1.48	0.000418655
2015-02-06 21:51:00	1311	-10	67	3.1	27																0.98	1.48	0.00040625
2015-02-06 22:51:00	1371	-8.9	59	3.1	27																0.98	1.48	0.000475791
2015-02-06 23:51:00	1431	-8.9	62	2.6	27																0.98	1.48	0.000454452
2015-02-07 00:51:00	51	-8.9	62	2.6	27																0.98	1.48	0.000334086
2015-02-07 01:51:00	111	-8.9	65	1.5	27																0.98	1.48	0.000414506
2015-02-07 02:51:00	171	-8.3	59	3.1	27																0.98	1.48	0.000461074
2015-02-07 03:51:00	231	-7.8	62	2.6	27																0.98	1.48	0.000445328
2015-02-07 04:51:00	291	-7.8	59	3.1	27																0.98	1.48	0.000472012
2015-02-07 05:51:00	351	-7.2	62	2.6	27																0.98	1.48	0.000453046
2015-02-07 06:51:00	411	-8.9	71	2.6	27																0.98	1.48	0.000467565
2015-02-07 07:51:00	471	-8.3	71	2.6	27																0.98	1.48	0.000445687
2015-02-07 08:51:00	531	-7.8	68	2.1	27																0.98	1.48	0.000430082
2015-02-07 09:51:00	591	-6.7	60	3.1	27																0.98	1.48	0.000475791
2015-02-07 10:51:00	651	-5.6	60	2.6	27																0.98	1.48	0.000432685
2015-02-07 11:51:00	711	-6.1	60	3.6	27																0.98	1.48	0.000363851
2015-02-07 12:51:00	771	-5.6	63	3.1	27																0.98	1.48	0.000446974
2015-02-07 13:51:00	831	-5.6	65	2.1	27																0.98	1.48	0.000435836
2015-02-07 14:51:00	891	-5	63	2.6	27																0.98	1.48	0.000435925
2015-02-07 15:51:00	951	-5	65	3.6	27																0.98	1.48	0.000432854
2015-02-07 16:51:00	1011	-4.4	63	2.6	27																0.98	1.48	0.000361438
2015-02-07 17:51:00	1071	-4.4	69	2.6	27																0.98	1.48	0.000435676
2015-02-07 18:51:00	1131	-4.4	66	2.6	27																0.98	1.48	0.000479491
2015-02-07 19:51:00	1191	-4.4	66	2.6	27																0.98	1.48	0.000428636
2015-02-07 20:51:00	1251	-4.4	69	1.5	27																0.98	1.48	0.000432226
2015-02-07 21:51:00	1311	-4.4	69	2.6	27																0.98	1.48	0.0004131
2015-02-07 22:51:00	1371	-4.4	69	2.1	27																0.98	1.48	0.000452069
2015-02-07 23:51:00	1431	-4.4	69	2.6	27																0.98	1.48	0.000421118
2015-02-08 00:51:00	51	-4.4	75	3.6	27																0.98	1.48	0.00042368
2015-02-08 01:51:00	111	-4.4	75	2.1	27																0.98	1.48	0.000468223
2015-02-08 02:51:00	171	-4.4	78	2.6	27																0.98	1.48	0.000432834
2015-02-08 03:51:00	231	-3.9	75	3.1	27																0.98	1.48	0.000426582
2015-02-08 04:51:00	291	-3.9	75	1.5	27																0.98	1.48	0.000465072
2015-02-08 05:51:00	351	-3.3	78	1	27																0.98	1.48	0.000453984
2015-02-08 06:51:00	411	-3.9	81	1.5	27																0.98	1.48	0.000458032
2015-02-08 07:51:00	471	-3.9	81	1.5	27																0.98	1.48	0.000445358
2015-02-08 08:51:00	531	-3.9	75	1	27																0.98	1.48	0.000456746
2015-02-08 09:51:00	591	-3.3	72	1.5	27																0.98	1.48	0.000463985
2015-02-08 10:51:00	651	-2.2	63	2.6	27																0.98	1.48	0.000450105
2015-02-08 11:51:00	711	-2.8	72	4.6	27																0.98	1.48	0.000442796
2015-02-08 12:51:00	771	-2.8	75	3.6	27																0.98	1.48	0.000446804
2015-02-08 13:51:00	831	-2.8	78	2.6	27																0.98	1.48	0.000461044
2015-02-08 14:51:00	891	-2.2	72	4.1	27																0.98	1.48	0.000466857
2015-02-08 15:51:00	951	-1.7	75	2.6	27																0.98	1.48	0.000431807
2015-02-08 16:51:00	1011	0.6	82	5.2	27																0.98	1.48	0.000465252
2015-02-08 17:51:00	1071	-1.7	89	3.1	27																0.98	1.48	0.00046588
2015-02-08 18:51:00	1131	-1.7	92	0	27																0.98	1.48	0.00045872
2015-02-08 19:51:00	1191	-1.1	89	2.6	27																0.98	1.48	0.000470686
2015-02-08 20:51:00	1251	-1.7	92	3.1	27																0.98	1.48	0.000465002
2015-02-08 21:51:00	1311	-1.7	89	2.6	27																0.98	1.48	0.000452677
2015-02-08 22:51:00	1371	-2.2	89	2.6	27																0.98	1.48	0.000468821
2015-02-08 23:51:00	1431	-1.1	89	3.1	27																0.98	1.48	0.000463716
2015-02-09 00:51:00	51	-1.7	82	2.1	27																0.98	1.48	0.000467744
2015-02-09 01:51:00	111	-1.7	85	2.6	27																0.98	1.48	0.000462071
2015-02-09 02:51:00	171	-1.7	85	2.6	27																0.98	1.48	0.000466638
2015-02-09 03:51:00	231	-1.7	82	1.5	27																0.98	1.48	0.000461403
2015-02-09 04:51:00	291	-1.7	85	1	27																0.98	1.48	0.000459458
2015-02-09 05:51:00	351	-1.1	85	2.1	27																0.98	1.48	0.000460655
2015-02-09 06:51:00	411	-2.2	89	1	27																0.98	1.48	0.000461153
2015-02-09 07:51:00	471	-1.7	89	2.1	27																0.98	1.48	0.000456237
2015-02-09 08:51:00	531	-2.2	85	2.6	27																0.98	1.48	0.000453984
2015-02-09 09:51:00	591	-1.7	92	1.5	27																0.98	1.48	0.00045525
2015-02-09 10:51:00	651	-1.7	85	2.6	27																0.98	1.48	0.000458142
2015-02-09 11:51:00	711	-1.7	82	3.1	27																0.98	1.48	0.000456158
2015-02-09 12:51:00	771	-0.6	75	3.1	27																0.98	1.48	0.000457294
2015-02-09 13:51:00	831	-0.6	72	1.5	27																0.98	1.48	0.000458351
2015-02-09 14:51:00	891	0	67	3.1	27																0.98	1.48	0.000455749
2015-02-09 15:51:00	951	-0.6	69	2.1	27																0.98	1.48	0.000451291
2015-02-09 16:51:00	1011	-1.1	75	2.6	27																0.98	1.48	0.000449686
2015-02-09 17:51:00	1071	-2.2	92	2.6	27																0.98	1.48	0.000446455
2015-02-09 18:51:00	1131	-2.2	96	2.6	27																0.98	1.48	0.000442367
2015-02-09 19:51:00	1191	-2.2	96	2.6	27																0.98	1.48	0.000449417
2015-02-09 20:51:00	1251	-2.2	92	3.1	27																0.98	1.48	0.000438977
2015-02-09 21:51:00	1311	-2.2	92	4.1	27																0.98	1.48	0.000434081
2015-02-09 22:51:00	1371	-2.2	92	2.6	27																0.98	1.48	0.000443693
2015-02-09 23:51:00	1431	-2.8	96	1.5	27																0.98	1.48	0.000426034
2015-02-10 00:51:00	51	-3.3	92	2.6	27																0.98	1.48	0.000429873
2015-02-10 01:51:00	111	-3.3	92	2.6	27																0.98	1.48	0.000410289
2015-02-10 02:51:00	171	-3.9	92	2.6	27																0.98	1.48	0.000394543
2015-02-10 03:51:00	231	-5	92	1.5	27																0.98	1.48	0.000399051
2015-02-10 04:51:00	291	-5.6	92	2.1	27																0.98	1.48	0.000370422
2015-02-10 05:51:00	351	-6.7	92	1.5	27																0.98	1.48	0.000394573
2015-02-10 06:51:00	411	-6.7	92	1.5	27																0.98	1.48	0.000384173
2015-02-10 07:51:00	471	-6.7	92	1.5	27																0.98	1.48	0.000387115
2015-02-10 08:51:00	531	-6.1	92	2.1	27																0.98	1.48	0.000369455
2015-02-10 09:51:00	591	-5.6	88	1.5	27																0.98	1.48	0.000245818
2015-02-10 10:51:00	651	-5	88	1.5	27																0.98	1.48	0.000386337
2015-02-10 11:51:00	711	-4.4	92	2.6	27																0.98	1.48	0.000407088
2015-02-10 12:51:00	771	-3.9	92	1.5	27																0.98	1.48	0.000407626
2015-02-10 13:51:00	831	-3.9	92	3.1	27																0.98	1.48	0.000405093
2015-02-10 14:51:00	891	-3.9	92	3.1	27																0.98	1.48	0.000404984
2015-02-10 15:51:00	951	-3.9	92	2.6	27																0.98	1.48	0.000411156
2015-02-10 16:51:00	1011	-3.9	88	4.1	27																0.98	1.48	0.000415743
2015-02-10 17:51:00	1071	-3.9	88	2.1	27																0.98	1.48	0.000418814
2015-02-10 18:51:00	1131	-3.9	92	2.1	27																0.98	1.48	0.000426412
2015-02-10 19:51:00	1191	-3.3	92	1.5	27																0.98	1.48	0.000423351
2015-02-10 20:51:00	1251	-3.3	92	4.6	27																0.98	1.48	0.000420838
2015-02-10 21:51:00	1311	-3.3	92	2.6	27																0.98	1.48	0.000412173
2015-02-10 22:51:00	1371	-0.6	89	6.2	27																0.98	1.48	0.000371988
2015-02-10 23:51:00	1431	1.1	76	6.7	27																0.98	1.48	0.00040617
2015-02-11 00:51:00	51	1.1	73	6.2	27																0.98	1.48	0.000419582
2015-02-11 01:51:00	111	1.1	79	6.2	27																0.98	1.48	0.000422783
2015-02-11 02:51:00	171	1.1	79	6.7	27																0.98	1.48	0.000425924
2015-02-11 03:51:00	231	1.7	76	6.2	27																0.98	1.48	0.000420928
2015-02-11 04:51:00	291	1.7	76	5.2	27																0.98	1.48	0.000418695
2015-02-11 05:51:00	351	1.7	76	5.2	27																0.98	1.48	0.000408194
2015-02-11 06:51:00	411	1.7	76	3.1	27																0.98	1.48	0.000411675
2015-02-11 07:51:00	471	1.7	79	3.6	27																0.98	1.48	0.00041667
2015-02-11 08:51:00	531	1.1	85	3.1	27																0.98	1.48	0.000395052
2015-02-11 09:51:00	591	0.6	89	3.1	27																0.98	1.48	0.000411395
2015-02-11 10:51:00	651	1.1	82	4.1	27																0.98	1.48	0.000403059
2015-02-11 11:51:00	711	1.7	76	1.5	27																0.98	1.48	0.000403987
2015-02-11 12:51:00	771	1.7	85	3.1	27																0.98	1.48	0.000388461
2015-02-11 13:51:00	831	1.1	85	2.6	27																0.98	1.48	0.000370243
2015-02-11 14:51:00	891	0.6	89	3.1	27																0.98	1.48	0.000390714
2015-02-11 15:51:00	951	0	92	2.1	27																0.98	1.48	0.000407357
2015-02-11 16:51:00	1011	0	92	2.1	27																0.98	1.48	0.000352115
2015-02-11 17:51:00	1071	-0.6	96	2.6	27																0.98	1.48	0.000361249
2015-02-11 18:51:00	1131	-0.6	96	2.1	27																0.98	1.48	0.000390694
2015-02-11 19:51:00	1191	-1.1	100	3.6	27																0.98	1.48	0.000345224
2015-02-11 20:51:00	1251	-1.1	96	3.1	27																0.98	1.48	0.000299764
2015-02-11 21:51:00	1311	-1.1	96	2.6	27																0.98	1.48	0.000382727
2015-02-11 22:51:00	1371	-1.7	96	2.6	27																0.98	1.48	0.000383435
2015-02-11 23:51:00	1431	-1.1	92	1.5	27																0.98	1.48	0.000305069
2015-02-12 00:51:00	51	-1.7	92	2.1	27																0.98	1.48	0.000345972
2015-02-12 01:51:00	111	-1.7	96	1.5	27																0.98	1.48	0.000383036
2015-02-12 02:51:00	171	-1.7	96	1.5	27																0.98	1.48	0.000300283
2015-02-12 03:51:00	231	-1.7	96	2.6	27																0.98	1.48	0.00033271
2015-02-12 04:51:00	291	-2.2	96	0	27																0.98	1.48	0.000332421
2015-02-12 05:51:00	351	-2.2	96	2.1	27																0.98	1.48	0.000312627
2015-02-12 06:51:00	411	-2.8	92	2.1	27																0.98	1.48	0.000287509
2015-02-12 07:51:00	471	-3.9	96	1.5	27																0.98	1.48	0.000284996
2015-02-12 08:51:00	531	-3.9	92	0	27																0.98	1.48	0.000323267
2015-02-12 09:51:00	591	-3.3	96	0	27																0.98	1.48	0.000311281
2015-02-12 10:51:00	651	-2.8	100	1.5	27																0.98	1.48	0.000332331
2015-02-12 11:51:00	711	-2.2	96	0	27																0.98	1.48	0.000267785
2015-02-12 12:51:00	771	-2.2	96	1.5	27																0.98	1.48	0.000257983
2015-02-12 13:51:00	831	-1.7	92	2.1	27																0.98	1.48	0.00029781
2015-02-12 14:51:00	891	-2.2	96	0	27																0.98	1.48	0.00030131
2015-02-12 15:51:00	951	-1.7	96	2.6	27																0.98	1.48	0.000232127
2015-02-12 16:51:00	1011	-1.7	92	3.1	27																0.98	1.48	0.000261743
2015-02-12 17:51:00	1071	-1.7	92	2.6	27																0.98	1.48	0.000321323
2015-02-12 18:51:00	1131	-2.2	96	3.6	27																0.98	1.48	0.000279711
2015-02-12 19:51:00	1191	-2.2	96	3.1	27																0.98	1.48	0.000265492
2015-02-12 20:51:00	1251	-1.7	92	2.6	27																0.98	1.48	0.000233832
2015-02-12 21:51:00	1311	-2.2	96	2.6	27																0.98	1.48	0.000177084
2015-02-12 22:51:00	1371	-2.2	96	3.1	27																0.98	1.48	0.000228577
2015-02-12 23:51:00	1431	-2.2	96	2.6	27																0.98	1.48	0.000144388
2015-02-13 00:51:00	51	-2.2	89	2.1	27																0.98	1.48	0.000145375
2015-02-13 01:51:00	111	-2.2	92	1.5	27																0.98	1.48	0.000202462
2015-02-13 02:51:00	171	-2.2	92	1.5	27																0.98	1.48	0.000168768
2015-02-13 03:51:00	231	-2.8	96	1.5	27																0.98	1.48	0.000230512
2015-02-13 04:51:00	291	-3.3	92	1.5	27																0.98	1.48	0.000182958
2015-02-13 05:51:00	351	-3.3	92	1.5	27																0.98	1.48	0.000164072
2015-02-13 06:51:00	411	-3.3	92	0	27																0.98	1.48	0.000177533
2015-02-13 07:51:00	471	-3.9	96	2.1	27																0.98	1.48	0.000176307
2015-02-13 08:51:00	531	-3.9	96	2.6	27																0.98	1.48	0.000167831
2015-02-13 09:51:00	591	-3.9	92	3.6	27																0.98	1.48	0.000169905
2015-02-13 10:51:00	651	-3.9	92	2.1	27																0.98	1.48	0.000177473
2015-02-13 11:51:00	711	-3.9	92	2.6	27																0.98	1.48	0.000126748
2015-02-13 12:51:00	771	-3.3	92	1.5	27																0.98	1.48	7.54296e-05
2015-02-13 13:51:00	831	-3.3	92	2.6	27																0.98	1.48	0.00010873
2015-02-13 14:51:00	891	-3.9	96	3.1	27																0.98	1.48	5.80203e-05
2015-02-13 15:51:00	951	-4.4	96	3.1	27																0.98	1.48	5.99478e-05
2015-02-13 16:51:00	1011	-5	92	2.1	27																0.98	1.48	4.73159e-06
2015-02-13 17:51:00	1071	-5	92	3.6	27																0.98	1.48	1.6113e-05
2015-02-13 18:51:00	1131	-5	92	2.1	27																0.98	1.48	1.59794e-05
2015-02-13 19:51:00	1191	-5.6	92	2.1	27																0.98	1.48	4.61662e-06
2015-02-13 20:51:00	1251	-5.6	92	2.1	27																0.98	1.48	1.51208e-06
2015-02-13 21:51:00	1311	-6.1	92	3.1	27																0.98	1.48	9.58224e-08
2015-02-13 22:51:00	1371	-6.1	92	2.1	27																0.98	1.48	2.89264e-07
2015-02-13 23:51:00	1431	-6.1	92	1	27																0.98	1.48	3.59314e-09
2015-02-14 00:51:00	51	-6.1	88	2.1	27																0.98	1.48	4.79331e-08
2015-02-14 01:51:00	111	-6.1	88	3.6	27																0.98	1.48	7.15816e-08
2015-02-14 02:51:00	171	-6.7	88	2.6	27																0.98	1.48	4.18286e-09
2015-02-14 03:51:00	231	-6.7	92	1	27																0.98	1.48	7.32299e-10
2015-02-14 04:51:00	291	-7.8	92	1.5	27																0.98	1.48	2.13431e-09
2015-02-14 05:51:00	351	-7.2	92	3.1	27																0.98	1.48	4.7996e-12
2015-02-14 06:51:00	411	-7.2	92	4.1	27																0.98	1.48	1.80245e-14
2015-02-14 07:51:00	471	-7.8	92	2.1	27																0.98	1.48	3.14731e-09
2015-02-14 08:51:00	531	-7.8	92	1.5	27																0.98	1.48	1.35503e-09
2015-02-14 09:51:00	591	-7.2	92	1.5	27																0.98	1.48	9.05056e-15
2015-02-14 10:51:00	651	-6.7	92	2.1	27																0.98	1.48	1.27546e-08
2015-02-14 11:51:00	711	-5.6	92	1.5	27																0.98	1.48	4.96223e-09
2015-02-14 12:51:00	771	-5.6	92	2.1	27																0.98	1.48	1.47678e-16
2015-02-14 13:51:00	831	-5.6	88	2.1	27																0.98	1.48	5.15199e-10
2015-02-14 14:51:00	891	-5	88	3.1	27																0.98	1.48	2.91169e-10
2015-02-14 15:51:00	951	-4.4	88	2.1	27																0.98	1.48	1.96748e-11
2015-02-14 16:51:00	1011	-5	88	1.5	27																0.98	1.48	2.74197e-09
2015-02-14 17:51:00	1071	-6.7	88	1.5	27																0.98	1.48	4.42746e-08
2015-02-14 18:51:00	1131	-7.8	88	0	27																0.98	1.48	1.7866e-07
2015-02-14 19:51:00	1191	-9.4	88	1.5	27																0.98	1.48	3.22399e-07
2015-02-14 20:51:00	1251	-10	84	2.6	27																0.98	1.48	2.56747e-07
2015-02-14 21:51:00	1311	-10.6	88	2.1	27																0.98	1.48	1.22351e-07
2015-02-14 22:51:00	1371	-10.6	88	0	27																0.98	1.48	1.10574e-06
2015-02-14 23:51:00	1431	-10.6	88	0	27																0.98	1.48	5.20155e-08
2015-02-15 00:51:00	51	-9.4	84	0	27																0.98	1.48	8.13547e-08
2015-02-15 01:51:00	111	-8.3	88	1	27																0.98	1.48	2.36485e-09
2015-02-15 02:51:00	171	-9.4	88	1	27																0.98	1.48	2.55989e-09
2015-02-15 03:51:00	231	-11.7	84	1.5	27																0.98	1.48	4.38917e-11
2015-02-15 04:51:00	291	-11.1	88	1.5	27																0.98	1.48	6.15134e-10
2015-02-15 05:51:00	351	-9.4	88	1.5	27																0.98	1.48	2.08395e-09
2015-02-15 06:51:00	411	-10	92	2.1	27																0.98	1.48	2.51432e-09
2015-02-15 07:51:00	471	-11.1	80	1.5	27																0.98	1.48	1.98394e-07
2015-02-15 08:51:00	531	-13.3	87	2.1	27																0.98	1.48	4.01474e-09
2015-02-15 09:51:00	591	-10	88	2.1	27																0.98	1.48	5.79326e-07
2015-02-15 10:51:00	651	-7.8	88	1.5	27																0.98	1.48	4.91876e-07
2015-02-15 11:51:00	711	-6.7	88	1.5	27																0.98	1.48	3.42861e-07
2015-02-15 12:51:00	771	-5.6	92	2.1	27																0.98	1.48	2.37143e-08
2015-02-15 13:51:00	831	-5.6	92	1.5	27																0.98	1.48	1.1553e-07
2015-02-15 14:51:00	891	-3.9	85	1.5	27																0.98	1.48	7.5311e-08
2015-02-15 15:51:00	951	-4.4	81	1.5	27																0.98	1.48	6.69449e-10
2015-02-15 16:51:00	1011	-5	85	2.1	27																0.98	1.48	6.3035e-12
2015-02-15 17:51:00	1071	-6.7	88	0	27																0.98	1.48	4.89173e-08
2015-02-15 18:51:00	1131	-7.8	88	0	27																0.98	1.48	1.26678e-06
2015-02-15 19:51:00	1191	-8.9	92	1.5	27																0.98	1.48	8.09947e-07
2015-02-15 20:51:00	1251	-8.3	84	0	27																0.98	1.48	3.23736e-12
2015-02-15 21:51:00	1311	-8.9	81	1.5	27																0.98	1.48	1.0498e-11
2015-02-15 22:51:00	1371	-7.2	92	2.1	27																0.98	1.48	1.83007e-06
2015-02-15 23:51:00	1431	-8.3	84	1.5	27																0.98	1.48	2.37322e-06
2015-02-16 00:51:00	51	-10.6	84	0	27																0.98	1.48	7.36816e-07
2015-02-16 01:51:00	111	-10	88	0	27																0.98	1.48	3.63402e-10
2015-02-16 02:51:00	171	-10.6	84	0	27																0.98	1.48	2.03898e-06
2015-02-16 03:51:00	231	-9.4	88	2.1	27																0.98	1.48	1.74073e-07
2015-02-16 04:51:00	291	-7.2	88	1.5	27																0.98	1.48	1.6446e-06
2015-02-16 05:51:00	351	-6.7	92	2.1	27																0.98	1.48	6.17427e-07
2015-02-16 06:51:00	411	-5.6	92	2.6	27																0.98	1.48	4.65202e-07
2015-02-16 07:51:00	471	-5.6	92	2.6	27																0.98	1.48	2.10818e-06
2015-02-16 08:51:00	531	-5.6	92	2.6	27																0.98	1.48	2.63208e-06
2015-02-16 09:51:00	591	-5	92	2.6	27																0.98	1.48	2.32865e-05
2015-02-16 10:51:00	651	-3.9	88	2.6	27																0.98	1.48	3.62744e-07
2015-02-16 11:51:00	711	-2.2	85	2.1	27																0.98	1.48	1.83137e-07
2015-02-16 12:51:00	771	-2.2	85	3.1	27																0.98	1.48	3.54637e-05
2015-02-16 13:51:00	831	-1.7	82	3.1	27																0.98	1.48	1.17255e-05
2015-02-16 14:51:00	891	-1.7	82	3.1	27																0.98	1.48	1.35204e-05
2015-02-16 15:51:00	951	-2.8	85	2.6	27																0.98	1.48	2.1381e-06
2015-02-16 16:51:00	1011	-2.8	81	2.1	27																0.98	1.48	8.24825e-06
2015-02-16 17:51:00	1071	-3.9	88	1.5	27																0.98	1.48	9.13761e-06
2015-02-16 18:51:00	1131	-3.9	88	1.5	27																0.98	1.48	4.61821e-05
2015-02-16 19:51:00	1191	-3.9	88	1.5	27																0.98	1.48	9.19355e-06
2015-02-16 20:51:00	1251	-7.2	92	2.1	27																0.98	1.48	1.69267e-05
2015-02-16 21:51:00	1311	-5.6	88	2.1	27																0.98	1.48	2.57764e-05
2015-02-16 22:51:00	1371	-8.3	88	1.5	27																0.98	1.48	2.77129e-05
2015-02-16 23:51:00	1431	-7.2	88	0	27																0.98	1.48	4.94049e-05
2015-02-17 00:51:00	51	-6.7	84	1.5	27																0.98	1.48	4.54582e-06
2015-02-17 01:51:00	111	-8.9	88	2.1	27																0.98	1.48	3.79118e-05
2015-02-17 02:51:00	171	-7.8	84	1.5	27																0.98	1.48	6.14256e-05
2015-02-17 03:51:00	231	-10.6	84	0	27																0.98	1.48	5.00132e-05
2015-02-17 04:51:00	291	-8.9	88	2.1	27																0.98	1.48	2.51223e-06
2015-02-17 05:51:00	351	-8.3	84	0	27																0.98	1.48	3.5732e-05
2015-02-17 06:51:00	411	-8.9	88	1.5	27																0.98	1.48	2.09023e-05
2015-02-17 07:51:00	471	-10	88	0	27																0.98	1.48	2.1355e-05
2015-02-17 08:51:00	531	-10.6	88	1.5	27																0.98	1.48	3.82418e-05
2015-02-17 09:51:00	591	-7.8	88	3.1	27																0.98	1.48	2.97949e-05
2015-02-17 10:51:00	651	-6.7	96	2.6	27																0.98	1.48	1.32252e-05
2015-02-17 11:51:00	711	-6.1	96	1.5	27																0.98	1.48	5.08937e-05
2015-02-17 12:51:00	771	-5	96	1.5	27																0.98	1.48	3.94883e-05
2015-02-17 13:51:00	831	-3.9	88	1.5	27																0.98	1.48	3.17095e-05
2015-02-17 14:51:00	891	-3.9	85	1.5	27																0.98	1.48	3.62136e-05
2015-02-17 15:51:00	951	-3.3	81	2.6	27																0.98	1.48	4.49347e-05
2015-02-17 16:51:00	1011	-3.9	81	2.1	27																0.98	1.48	6.16151e-05
2015-02-17 17:51:00	1071	-7.2	84	1.5	27																0.98	1.48	4.96094e-05
2015-02-17 18:51:00	1131	-8.9	84	1.5	27																0.98	1.48	2.30292e-05
2015-02-17 19:51:00	1191	-11.1	84	1.5	27																0.98	1.48	3.61119e-05
2015-02-17 20:51:00	1251	-11.1	80	1.5	27																0.98	1.48	0.000115361
2015-02-17 21:51:00	1311	-12.2	84	1.5	27																0.98	1.48	0.000101839
2015-02-17 22:51:00	1371	-13.3	87	1.5	27																0.98	1.48	2.7334e-05
2015-02-17 23:51:00	1431	-12.8	92	0	27																0.98	1.48	1.12389e-05
2015-02-18 00:51:00	51	-12.8	84	1.5	27																0.98	1.48	6.21834e-05
2015-02-18 01:51:00	111	-14.4	80	0	27																0.98	1.48	8.17446e-05
2015-02-18 02:51:00	171	-13.9	87	2.1	27																0.98	1.48	0.000137198
2015-02-18 03:51:00	231	-14.4	83	2.1	27																0.98	1.48	6.59617e-05
2015-02-18 04:51:00	291	-14.4	83	2.1	27																0.98	1.48	8.8257e-05
2015-02-18 05:51:00	351	-13.9	84	1.5	27																0.98	1.48	0.000116667
2015-02-18 06:51:00	411	-13.3	87	0	27																0.98	1.48	0.000136042
2015-02-18 07:51:00	471	-12.2	88	0	27																0.98	1.48	0.000162606
2015-02-18 08:51:00	531	-10.6	88	2.6	27																0.98	1.48	8.51778e-05
2015-02-18 09:51:00	591	-10.6	84	0	27																0.98	1.48	9.0019e-05
2015-02-18 10:51:00	651	-9.4	92	0	27																0.98	1.48	0.000130228
2015-02-18 11:51:00	711	-8.3	92	2.1	27																0.98	1.48	4.31019e-05
2015-02-18 12:51:00	771	-8.3	88	1.5	27																0.98	1.48	0.000151408
2015-02-18 13:51:00	831	-7.2	88	1.5	27																0.98	1.48	9.31171e-05
2015-02-18 14:51:00	891	-6.1	85	1.5	27																0.98	1.48	6.50114e-05
2015-02-18 15:51:00	951	-5.6	81	1	27																0.98	1.48	3.59513e-05
2015-02-18 16:51:00	1011	-6.7	84	1.5	27																0.98	1.48	7.67229e-05
2015-02-18 17:51:00	1071	-8.9	88	0	27																0.98	1.48	9.4575e-05
2015-02-18 18:51:00	1131	-11.7	84	1.5	27																0.98	1.48	4.95366e-05
2015-02-18 19:51:00	1191	-12.8	84	1	27																0.98	1.48	1.77972e-05
2015-02-18 20:51:00	1251	-11.1	84	1	27																0.98	1.48	4.66378e-05
2015-02-18 21:51:00	1311	-11.7	88	1.5	27																0.98	1.48	6.99981e-05
2015-02-18 22:51:00	1371	-12.8	84	1	27																0.98	1.48	9.70619e-05
2015-02-18 23:51:00	1431	-13.3	87	1.5	27																0.98	1.48	0.000184104
2015-02-19 00:51:00	51	-13.3	80	1.5	27																0.98	1.48	6.85822e-05
2015-02-19 01:51:00	111	-12.8	84	0	27																0.98	1.48	6.95375e-05
2015-02-19 02:51:00	171	-14.4	83	0	27																0.98	1.48	6.32993e-05
2015-02-19 03:51:00	231	-13.9	87	0	27																0.98	1.48	0.000119668
2015-02-19 04:51:00	291	-12.8	84	0	27																0.98	1.48	6.04644e-05
2015-02-19 05:51:00	351	-12.2	80	1.5	27																0.98	1.48	0.000114962
2015-02-19 06:51:00	411	-13.9	84	0	27																0.98	1.48	5.83235e-05
2015-02-19 07:51:00	471	-12.2	84	0	27																0.98	1.48	0.000148167
2015-02-19 08:51:00	531	-11.7	77	1.5	27																0.98	1.48	0.000137079
2015-02-19 09:51:00	591	-10	84	2.1	27																0.98	1.48	0.000124674
2015-02-19 10:51:00	651	-8.3	88	2.1	27																0.98	1.48	0.000123049
2015-02-19 11:51:00	711	-6.7	88	1.5	27																0.98	1.48	6.04564e-05
2015-02-19 12:51:00	771	-5.6	78	1.5	27																0.98	1.48	9.39119e-05
2015-02-19 13:51:00	831	-5.6	85	3.1	27																0.98	1.48	0.00018919
2015-02-19 14:51:00	891	-4.4	78	3.1	27																0.98	1.48	0.000174282
2015-02-19 15:51:00	951	-4.4	81	1.5	27																0.98	1.48	0.000197217
2015-02-19 16:51:00	1011	-4.4	78	1.5	27																0.98	1.48	0.000163942
2015-02-19 17:51:00	1071	-6.7	88	1.5	27																0.98	1.48	0.000181053
2015-02-19 18:51:00	1131	-8.9	81	1	27																0.98	1.48	0.00020309
2015-02-19 19:51:00	1191	-10	84	1	27																0.98	1.48	0.00018201
2015-02-19 20:51:00	1251	-11.7	84	1.5	27																0.98	1.48	0.00016804
2015-02-19 21:51:00	1311	-10.6	84	2.1	27																0.98	1.48	0.000227849
2015-02-19 22:51:00	1371	-10.6	84	1.5	27																0.98	1.48	0.00018914
2015-02-19 23:51:00	1431	-11.1	88	0	27																0.98	1.48	0.00021697
2015-02-20 00:51:00	51	-13.3	84	1.5	27																0.98	1.48	0.000249896
2015-02-20 01:51:00	111	-12.8	84	1.5	27																0.98	1.48	0.000264764
2015-02-20 02:51:00	171	-11.7	77	1.5	27																0.98	1.48	0.000232895
2015-02-20 03:51:00	231	-13.3	84	1.5	27																0.98	1.48	0.000184403
2015-02-20 04:51:00	291	-13.3	87	0	27																0.98	1.48	0.000159834
2015-02-20 05:51:00	351	-12.2	84	0	27																0.98	1.48	0.000183496
2015-02-20 06:51:00	411	-11.7	84	0	27																0.98	1.48	0.000256996
2015-02-20 07:51:00	471	-12.8	84	0	27																0.98	1.48	0.000254414
2015-02-20 08:51:00	531	-11.7	80	0	27																0.98	1.48	0.000242328
2015-02-20 09:51:00	591	-8.9	92	1.5	27																0.98	1.48	0.000186368
2015-02-20 10:51:00	651	-7.8	92	3.6	27																0.98	1.48	0.00026975
2015-02-20 11:51:00	711	-6.7	92	2.1	27																0.98	1.48	0.000263986
2015-02-20 12:51:00	771	-6.1	92	2.1	27																0.98	1.48	0.000259938
2015-02-20 13:51:00	831	-5	85	3.1	27																0.98	1.48	0.0002417
2015-02-20 14:51:00	891	-3.9	75	1.5	27																0.98	1.48	0.000225067
2015-02-20 15:51:00	951	-3.9	75	2.1	27																0.98	1.48	0.000264973
2015-02-20 16:51:00	1011	-5.6	74	2.1	27																0.98	1.48	0.000256099
2015-02-20 17:51:00	1071	-6.7	81	2.1	27																0.98	1.48	0.00024858
2015-02-20 18:51:00	1131	-7.2	81	2.6	27																0.98	1.48	0.000251392
2015-02-20 19:51:00	1191	-7.2	81	1.5	27																0.98	1.48	0.000243674
2015-02-20 20:51:00	1251	-6.7	78	1.5	27																0.98	1.48	0.000263747
2015-02-20 21:51:00	1311	-5.6	81	1.5	27																0.98	1.48	0.000274267
2015-02-20 22:51:00	1371	-5	85	2.6	27																0.98	1.48	0.000263029
2015-02-20 23:51:00	1431	-5	81	2.6	27																0.98	1.48	0.000279243
2015-02-21 00:51:00	51	-4.4	81	1.5	27																0.98	1.48	0.000274606
2015-02-21 01:51:00	111	-4.4	81	1	27																0.98	1.48	0.000258103
2015-02-21 02:51:00	171	-4.4	81	3.1	27																0.98	1.48	0.000266689
2015-02-21 03:51:00	231	-4.4	78	3.1	27																0.98	1.48	0.000261453
2015-02-21 04:51:00	291	-4.4	78	2.6	27																0.98	1.48	0.000278485
2015-02-21 05:51:00	351	-4.4	78	3.1	27																0.98	1.48	0.000271664
2015-02-21 06:51:00	411	-4.4	81	2.6	27																0.98	1.48	0.000254493
2015-02-21 07:51:00	471	-2.8	78	2.1	27																0.98	1.48	0.000268962
2015-02-21 08:51:00	531	0	69	2.6	27																0.98	1.48	0.000277597
2015-02-21 09:51:00	591	-2.8	78	2.1	27																0.98	1.48	0.000276351
2015-02-21 10:51:00	651	-3.3	81	5.2	27																0.98	1.48	0.000268154
2015-02-21 11:51:00	711	1.1	70	3.1	27																0.98	1.48	0.0002661
2015-02-21 12:51:00	771	-0.6	72	3.6	27																0.98	1.48	0.000273858
2015-02-21 13:51:00	831	-1.7	82	3.6	27																0.98	1.48	0.000272582
2015-02-21 14:51:00	891	-1.1	78	1	27																0.98	1.48	0.000271246
2015-02-21 15:51:00	951	-1.1	82	3.6	27																0.98	1.48	0.000272173
2015-02-21 16:51:00	1011	-1.7	89	3.6	27																0.98	1.48	0.000264156
2015-02-21 17:51:00	1071	-1.7	89	2.1	27																0.98	1.48	0.000268274
2015-02-21 18:51:00	1131	-1.7	89	3.1	27																0.98	1.48	0.000268503
2015-02-21 19:51:00	1191	-1.7	92	2.1	27																0.98	1.48	0.000271305
2015-02-21 20:51:00	1251	-1.7	92	2.6	27																0.98	1.48	0.000271325
2015-02-21 21:51:00	1311	-1.7	92	2.6	27																0.98	1.48	0.000276261
2015-02-21 22:51:00	1371	-1.7	92	2.6	27																0.98	1.48	0.000274028
2015-02-21 23:51:00	1431	-1.1	89	2.6	27																0.98	1.48	0.000272312
2015-02-22 00:51:00	51	-1.1	85	2.6	27																0.98	1.48	0.000265991
2015-02-22 01:51:00	111	-1.7	89	1	27																0.98	1.48	0.000272642
2015-02-22 02:51:00	171	-1.1	85	3.1	27																0.98	1.48	0.000269132
2015-02-22 03:51:00	231	-1.7	89	3.1	27																0.98	1.48	0.00026981
2015-02-22 04:51:00	291	-1.1	85	3.6	27																0.98	1.48	0.000271046
2015-02-22 05:51:00	351	-1.1	89	2.6	27																0.98	1.48	0.000270548
2015-02-22 06:51:00	411	-1.1	85	4.1	27																0.98	1.48	0.000263986
2015-02-22 07:51:00	471	-1.1	89	2.6	27																0.98	1.48	0.000266828
2015-02-22 08:51:00	531	-1.1	89	2.6	27																0.98	1.48	0.000262351
2015-02-22 09:51:00	591	-1.1	92	2.6	27																0.98	1.48	0.00026985
2015-02-22 10:51:00	651	-0.6	92	3.1	27																0.98	1.48	0.000267716
2015-02-22 11:51:00	711	0	89	3.6	27																0.98	1.48	0.000267317
2015-02-22 12:51:00	771	0	92	3.1	27																0.98	1.48	0.000264924
2015-02-22 13:51:00	831	0	67	10.3	27																0.98	1.48	0.000269251
2015-02-22 14:51:00	891	0	56	8.2	27																0.98	1.48	0.000266798
2015-02-22 15:51:00	951	-0.6	47	7.7	27																0.98	1.48	0.000265911
2015-02-22 16:51:00	1011	-0.6	43	5.7	27																0.98	1.48	0.000261892
2015-02-22 17:51:00	1071	-1.1	39	5.2	27																0.98	1.48	0.000266519
2015-02-22 18:51:00	1131	-2.2	47	8.2	27																0.98	1.48	0.000261703
2015-02-22 19:51:00	1191	-3.9	42	5.2	27																0.98	1.48	0.000262331
2015-02-22 20:51:00	1251	-4.4	38	3.6	27																0.98	1.48	0.000256488
2015-02-22 21:51:00	1311	-6.7	47	3.6	27																0.98	1.48	0.000253795
2015-02-22 22:51:00	1371	-5	44	3.6	27																0.98	1.48	0.000241062
2015-02-22 23:51:00	1431	-7.2	52	2.6	27																0.98	1.48	0.000234401
2015-02-23 00:51:00	51	-6.7	52	2.1	27																0.98	1.48	0.000237073
2015-02-23 01:51:00	111	-7.2	54	2.1	27																0.98	1.48	0.000233404
2015-02-23 02:51:00	171	-11.7	73	2.1	27																0.98	1.48	0.000240763
2015-02-23 03:51:00	231	-10.6	70	1.5	27																0.98	1.48	0.000239057
2015-02-23 04:51:00	291	-10	70	3.1	27																0.98	1.48	0.000246077
2015-02-23 05:51:00	351	-12.8	80	1.5	27																0.98	1.48	0.000215405
2015-02-23 06:51:00	411	-11.7	77	2.1	27																0.98	1.48	0.00023449
2015-02-23 07:51:00	471	-13.3	63	2.6	27																0.98	1.48	0.000236046
2015-02-23 08:51:00	531	-11.7	77	1	27																0.98	1.48	0.000243943
2015-02-23 09:51:00	591	-8.9	77	2.1	27																0.98	1.48	0.000247992
2015-02-23 10:51:00	651	-7.2	59	2.6	27																0.98	1.48	0.000241261
2015-02-23 11:51:00	711	-6.1	55	2.6	27																0.98	1.48	0.000246845
2015-02-23 12:51:00	771	-5.6	52	2.6	27																0.98	1.48	0.000248331
2015-02-23 13:51:00	831	-5	65	3.6	27																0.98	1.48	0.000258003
2015-02-23 14:51:00	891	-6.1	65	2.6	27																0.98	1.48	0.000254962
2015-02-23 15:51:00	951	-5.6	48	2.6	27																0.98	1.48	0.00025231
2015-02-23 16:51:00	1011	-5.6	52	2.6	27																0.98	1.48	0.000250355
2015-02-23 17:51:00	1071	-6.1	55	1.5	27																0.98	1.48	0.000231669
2015-02-23 18:51:00	1131	-6.1	57	1.5	27																0.98	1.48	0.000241102
2015-02-23 19:51:00	1191	-7.2	65	2.6	27																0.98	1.48	0.000241281
2015-02-23 20:51:00	1251	-7.2	71	2.6	27																0.98	1.48	0.000251532
2015-02-23 21:51:00	1311	-6.1	65	1.5	27																0.98	1.48	0.000257594
2015-02-23 22:51:00	1371	-8.9	71	1.5	27																0.98	1.48	0.00025551
2015-02-23 23:51:00	1431	-7.2	71	2.1	27																0.98	1.48	0.000257495
2015-02-24 00:51:00	51	-7.2	68	2.6	27																0.98	1.48	0.000243824
2015-02-24 01:51:00	111	-7.2	77	2.6	27																0.98	1.48	0.000246217
2015-02-24 02:51:00	171	-8.3	81	2.1	27																0.98	1.48	0.000253486
2015-02-24 03:51:00	231	-10	77	1.5	27																0.98	1.48	0.000241331
2015-02-24 04:51:00	291	-7.8	74	2.1	27																0.98	1.48	0.000237422
2015-02-24 05:51:00	351	-7.2	68	2.6	27																0.98	1.48	0.000222594
2015-02-24 06:51:00	411	-7.2	65	3.1	27																0.98	1.48	0.000223492
2015-02-24 07:51:00	471	-6.7	65	3.6	27																0.98	1.48	0.000223332
2015-02-24 08:51:00	531	-6.1	65	3.1	27																0.98	1.48	0.00022777
2015-02-24 09:51:00	591	-5.6	63	4.1	27																0.98	1.48	0.000236156
2015-02-24 10:51:00	651	-5.6	55	3.6	27																0.98	1.48	0.000240713
2015-02-24 11:51:00	711	-5	53	3.1	27																0.98	1.48	0.000232297
2015-02-24 12:51:00	771	-5	57	3.6	27																0.98	1.48	0.000229245
2015-02-24 13:51:00	831	-4.4	55	3.1	27																0.98	1.48	0.000226623
2015-02-24 14:51:00	891	-4.4	58	2.6	27																0.98	1.48	0.00021698
2015-02-24 15:51:00	951	-4.4	60	3.1	27																0.98	1.48	0.000226154
2015-02-24 16:51:00	1011	-3.9	63	4.1	27																0.98	1.48	0.000230103
2015-02-24 17:51:00	1071	-3.9	66	3.6	27																0.98	1.48	0.000236515
2015-02-24 18:51:00	1131	-3.9	69	2.1	27																0.98	1.48	0.000237701
2015-02-24 19:51:00	1191	-3.3	69	2.6	27																0.98	1.48	0.000240354
2015-02-24 20:51:00	1251	-3.3	69	2.1	27																0.98	1.48	0.000229844
2015-02-24 21:51:00	1311	-3.3	72	2.1	27																0.98	1.48	0.000233982
2015-02-24 22:51:00	1371	-3.3	75	1.5	27																0.98	1.48	0.000242827
2015-02-24 23:51:00	1431	-3.3	75	0	27																0.98	1.48	0.000240314
2015-02-25 00:51:00	51	-3.3	72	3.1	27																0.98	1.48	0.000233822
2015-02-25 01:51:00	111	-3.3	78	3.1	27																0.98	1.48	0.000233633
2015-02-25 02:51:00	171	-3.3	81	3.6	27																0.98	1.48	0.000236864
2015-02-25 03:51:00	231	-3.3	81	2.6	27																0.98	1.48	0.00024177
2015-02-25 04:51:00	291	-2.8	78	2.6	27																0.98	1.48	0.000241999
2015-02-25 05:51:00	351	-3.3	88	5.2	27																0.98	1.48	0.000237143
2015-02-25 06:51:00	411	-2.8	92	3.1	27																0.98	1.48	0.000239028
2015-02-25 07:51:00	471	-2.2	92	3.6	27																0.98	1.48	0.000240094
2015-02-25 08:51:00	531	0	85	6.2	27																0.98	1.48	0.000240573
2015-02-25 09:51:00	591	1.7	76	4.1	27																0.98	1.48	0.000240683
2015-02-25 10:51:00	651	0	85	3.6	27																0.98	1.48	0.000235837
2015-02-25 11:51:00	711	-0.6	92	4.1	27																0.98	1.48	0.000237382
2015-02-25 12:51:00	771	-0.6	92	2.6	27																0.98	1.48	0.000237532
2015-02-25 13:51:00	831	2.2	73	6.7	27																0.98	1.48	0.000232008
2015-02-25 14:51:00	891	1.7	79	3.1	27																0.98	1.48	0.000232157
2015-02-25 15:51:00	951	1.7	79	1.5	27																0.98	1.48	0.000233005
2015-02-25 16:51:00	1011	0.6	89	2.1	27																0.98	1.48	0.00023472
2015-02-25 17:51:00	1071	0.6	89	2.1	27																0.98	1.48	0.000226354
2015-02-25 18:51:00	1131	0	92	2.6	27																0.98	1.48	0.000219443
2015-02-25 19:51:00	1191	0	96	2.1	27																0.98	1.48	0.000219633
2015-02-25 20:51:00	1251	-0.6	96	2.1	27																0.98	1.48	0.000214498
2015-02-25 21:51:00	1311	-0.6	92	1.5	27																0.98	1.48	0.000218975
2015-02-25 22:51:00	1371	-0.6	92	1.5	27																0.98	1.48	0.000220191
2015-02-25 23:51:00	1431	-0.6	92	2.6	27																0.98	1.48	0.000214737
2015-02-26 00:51:00	51	-2.8	89	2.6	27																0.98	1.48	0.000222914
2015-02-26 01:51:00	111	-3.3	88	4.1	27																0.98	1.48	0.000217599
2015-02-26 02:51:00	171	-3.9	92	3.6	27																0.98	1.48	0.000216871
2015-02-26 03:51:00	231	-3.9	69	4.6	27																0.98	1.48	0.000227032
2015-02-26 04:51:00	291	-4.4	69	5.7	27																0.98	1.48	0.000215933
2015-02-26 05:51:00	351	-5	81	5.2	27																0.98	1.48	0.000218047
2015-02-26 06:51:00	411	-3.9	55	5.2	27																0.98	1.48	0.000224619
2015-02-26 07:51:00	471	-2.8	43	6.7	27																0.98	1.48	0.000207956
2015-02-26 08:51:00	531	-3.3	42	5.7	27																0.98	1.48	0.000223093
2015-02-26 09:51:00	591	-3.3	44	3.1	27																0.98	1.48	0.000222136
2015-02-26 10:51:00	651	-2.2	41	6.2	27																0.98	1.48	0.000215216
2015-02-26 11:51:00	711	-1.7	41	3.6	27																0.98	1.48	0.000221677
2015-02-26 12:51:00	771	-1.1	51	3.6	27																0.98	1.48	0.000220381
2015-02-26 13:51:00	831	-2.2	72	3.1	27																0.98	1.48	0.000221597
2015-02-26 14:51:00	891	-1.7	64	4.6	27																0.98	1.48	0.00022423
2015-02-26 15:51:00	951	-0.6	54	2.1	27																0.98	1.48	0.00022057
2015-02-26 16:51:00	1011	-1.1	49	4.1	27																0.98	1.48	0.000222684
2015-02-26 17:51:00	1071	-2.2	53	3.6	27																0.98	1.48	0.000223203
2015-02-26 18:51:00	1131	-3.9	66	5.2	27																0.98	1.48	0.000218456
2015-02-26 19:51:00	1191	-3.9	63	3.1	27																0.98	1.48	0.000221717
2015-02-26 20:51:00	1251	-5.6	71	4.1	27																0.98	1.48	0.000220351
2015-02-26 21:51:00	1311	-5	60	7.2	27																0.98	1.48	0.000211177
2015-02-26 22:51:00	1371	-5.6	57	6.2	27																0.98	1.48	0.000178331
2015-02-26 23:51:00	1431	-5.6	57	5.7	27																0.98	1.48	0.00021008
2015-02-27 00:51:00	51	-6.1	55	6.7	27																0.98	1.48	0.000213979
2015-02-27 01:51:00	111	-6.7	54	7.7	27																0.98	1.48	0.000214547
2015-02-27 02:51:00	171	-7.2	52	7.2	27																0.98	1.48	0.000221049
2015-02-27 03:51:00	231	-7.2	52	8.8	27																0.98	1.48	0.000218167
2015-02-27 04:51:00	291	-7.2	50	7.7	27																0.98	1.48	0.000210868
2015-02-27 05:51:00	351	-6.7	45	9.3	27																0.98	1.48	0.000215674
2015-02-27 06:51:00	411	-6.1	43	9.8	27																0.98	1.48	0.000215136
2015-02-27 07:51:00	471	-5.6	40	9.3	27																0.98	1.48	0.000212992
2015-02-27 08:51:00	531	-6.7	47	7.2	27																0.98	1.48	0.000210848
2015-02-27 09:51:00	591	-4.4	38	9.3	27																0.98	1.48	0.000211686
2015-02-27 10:51:00	651	-2.8	37	11.3	27																0.98	1.48	0.000208555
2015-02-27 11:51:00	711	-1.7	38	15.4	27																0.98	1.48	0.000212423
2015-02-27 12:51:00	771	-1.1	39	14.4	27																0.98	1.48	0.000204995
2015-02-27 13:51:00	831	-0.6	38	15.4	27																0.98	1.48	0.000193916
2015-02-27 14:51:00	891	0	30	12.9	27																0.98	1.48	0.00020308
2015-02-27 15:51:00	951	-0.6	32	11.8	27																0.98	1.48	0.000208465
2015-02-27 16:51:00	1011	-1.1	31	10.3	27																0.98	1.48	0.000197406
2015-02-27 17:51:00	1071	-1.7	31	8.2	27																0.98	1.48	0.000212603
2015-02-27 18:51:00	1131	-2.8	34	9.8	27																0.98	1.48	0.000209661
2015-02-27 19:51:00	1191	-3.3	41	9.3	27																0.98	1.48	0.000204257
2015-02-27 20:51:00	1251	-3.9	40	7.2	27																0.98	1.48	0.000209532
2015-02-27 21:51:00	1311	-5	44	7.2	27																0.98	1.48	0.00020659
2015-02-27 22:51:00	1371	-5.6	42	2.6	27																0.98	1.48	0.000204646
2015-02-27 23:51:00	1431	-7.2	47	4.1	27																0.98	1.48	0.00019248
2015-02-28 00:51:00	51	-8.3	52	2.6	27																0.98	1.48	0.00020649
2015-02-28 01:51:00	111	-10.6	58	1	27																0.98	1.48	0.000210738
2015-02-28 02:51:00	171	-11.7	61	1.5	27																0.98	1.48	0.000204187
2015-02-28 03:51:00	231	-9.4	59	3.1	27																0.98	1.48	0.000209083
2015-02-28 04:51:00	291	-10.6	61	1	27																0.98	1.48	0.000208624
2015-02-28 05:51:00	351	-11.1	67	1	27																0.98	1.48	0.000180554
2015-02-28 06:51:00	411	-11.7	61	1.5	27																0.98	1.48	0.0002068
2015-02-28 07:51:00	471	-14.4	76	2.1	27																0.98	1.48	0.000204925
2015-02-28 08:51:00	531	-10.6	73	2.6	27																0.98	1.48	0.000199181
2015-02-28 09:51:00	591	-7.2	71	2.1	27																0.98	1.48	0.00010169
2015-02-28 10:51:00	651	-5.6	71	2.1	27																0.98	1.48	0.00010169
2015-02-28 11:51:00	711	-5.6	68	2.1	27																0.98	1.48	6.5739e-05
2015-02-28 12:51:00	771	-4.4	66	1.5	27																0.98	1.48	6.5739e-05
2015-02-28 13:51:00	831	-3.9	66	2.1	27																0.98	1.48	6.5739e-05
2015-02-28 14:51:00	891	-3.3	66	3.1	27																0.98	1.48	3.7473e-05
2015-02-28 15:51:00	951	-3.9	66	3.1	27																0.98	1.48	3.7473e-05
2015-02-28 16:51:00	1011	-3.3	58	3.1	27																0.98	1.48	3.7473e-05
2015-02-28 17:51:00	1071	-5	65	2.1	27																0.98	1.48	3.7473e-05
2015-02-28 18:51:00	1131	-8.3	71	1.5	27																0.98	1.48	3.7473e-05
2015-02-28 19:51:00	1191	-10.6	77	1.5	27																0.98	1.48	3.7822e-05
2015-02-28 20:51:00	1251	-10	80	2.1	27																0.98	1.48	3.7822e-05
2015-02-28 21:51:00	1311	-9	70	2.5	27																0.98	1.48	3.7822e-05
2015-02-28 22:51:00	1371	-8.2	73	2.8	27																0.98	1.48	3.7822e-05
2015-02-28 23:51:00	1431	-7.3	80	3.2	27																0.98	1.48	3.7822e-05
2015-03-01 00:51:00	51	-6.4	53	3.5	27																2.33	3.48	3.72895e-05
2015-03-01 01:51:00	111	-5.5	55	3.9	27																2.33	3.48	3.72895e-05
2015-03-01 02:51:00	171	-4.7	53	4.2	27																2.33	3.48	3.72895e-05
2015-03-01 03:51:00	231	-3.9	53	4.6	27																2.33	3.48	3.72895e-05
2015-03-01 04:51:00	291	-4.4	58	5.7	27																2.33	3.48	3.72895e-05
2015-03-01 05:51:00	351	-3.9	55	3.6	27																2.33	3.48	3.55146e-05
2015-03-01 06:51:00	411	-3.9	60	5.7	27																2.33	3.48	3.55146e-05
2015-03-01 07:51:00	471	-3.9	58	5.7	27																2.33	3.48	3.55146e-05
2015-03-01 08:51:00	531	-3.3	58	4.6	27																2.33	3.48	3.55146e-05
2015-03-01 09:51:00	591	-2.8	58	4.1	27																2.33	3.48	3.55146e-05
2015-03-01 10:51:00	651	-2.8	61	4.1	27																2.33	3.48	3.47149e-05
2015-03-01 11:51:00	711	-2.2	58	5.2	27																2.33	3.48	3.47149e-05
2015-03-01 12:51:00	771	-1.7	53	5.2	27																2.33	3.48	3.47149e-05
2015-03-01 13:51:00	831	-2.2	66	6.2	27																2.33	3.48	3.47149e-05
2015-03-01 14:51:00	891	-2.2	69	6.2	27																2.33	3.48	3.47149e-05
2015-03-01 15:51:00	951	-1.7	72	6.2	27																2.33	3.48	3.2216e-05
2015-03-01 16:51:00	1011	-1.7	75	5.2	27																2.33	3.48	3.2216e-05
2015-03-01 17:51:00	1071	-1.7	78	5.2	27																2.33	3.48	3.2216e-05
2015-03-01 18:51:00	1131	-1.7	78	3.1	27																2.33	3.48	3.2216e-05
2015-03-01 19:51:00	1191	-1.7	75	2.1	27																2.33	3.48	3.2216e-05
2015-03-01 20:51:00	1251	-1.7	75	3.1	27																2.33	3.48	3.35402e-05
2015-03-01 21:51:00	1311	-1.7	75	2.6	27																2.33	3.48	3.35402e-05
2015-03-01 22:51:00	1371	-1.7	75	4.1	27																2.33	3.48	3.35402e-05
2015-03-01 23:51:00	1431	-1.7	78	4.6	27																2.33	3.48	3.35402e-05
2015-03-02 00:51:00	51	-1.7	75	2.6	27																2.33	3.48	3.35402e-05
2015-03-02 01:51:00	111	-2.2	78	4.1	27																2.33	3.48	3.08738e-05
2015-03-02 02:51:00	171	-2.2	78	3.6	27																2.33	3.48	3.08738e-05
2015-03-02 03:51:00	231	-1.7	75	3.6	27																2.33	3.48	3.08738e-05
2015-03-02 04:51:00	291	-1.7	75	3.1	27																2.33	3.48	3.08738e-05
2015-03-02 05:51:00	351	-1.7	75	4.6	27																2.33	3.48	3.08738e-05
2015-03-02 06:51:00	411	-1.7	72	3.6	27																2.33	3.48	3.30377e-05
2015-03-02 07:51:00	471	-1.7	72	2.6	27																2.33	3.48	3.30377e-05
2015-03-02 08:51:00	531	-1.1	69	3.1	27																2.33	3.48	3.30377e-05
2015-03-02 09:51:00	591	-0.6	66	4.6	27																2.33	3.48	3.30377e-05
2015-03-02 10:51:00	651	0.6	64	3.6	27																2.33	3.48	3.30377e-05
2015-03-02 11:51:00	711	1.7	59	4.1	27																2.33	3.48	3.05149e-05
2015-03-02 12:51:00	771	2.2	59	4.1	27																2.33	3.48	3.05149e-05
2015-03-02 13:51:00	831	2.2	57	3.6	27																2.33	3.48	3.05149e-05
2015-03-02 14:51:00	891	2.8	57	2.6	27																2.33	3.48	3.05149e-05
2015-03-02 15:51:00	951	2.8	59	2.1	27																2.33	3.48	3.05149e-05
2015-03-02 16:51:00	1011	2.2	62	2.1	27																2.33	3.48	3.19049e-05
2015-03-02 17:51:00	1071	1.7	70	3.1	27																2.33	3.48	3.19049e-05
2015-03-02 18:51:00	1131	0.6	75	2.6	27																2.33	3.48	3.19049e-05
2015-03-02 19:51:00	1191	1.1	70	2.1	27																2.33	3.48	3.19049e-05
2015-03-02 20:51:00	1251	1.7	82	6.7	27																2.33	3.48	3.19049e-05
2015-03-02 21:51:00	1311	1.7	82	4.1	27																2.33	3.48	2.64924e-05
2015-03-02 22:51:00	1371	2.2	76	4.6	27																2.33	3.48	2.64924e-05
2015-03-02 23:51:00	1431	1.1	76	3.1	27																2.33	3.48	2.64924e-05
2015-03-03 00:51:00	51	0.6	82	0	27																2.33	3.48	2.64924e-05
2015-03-03 01:51:00	111	0	85	1.5	27																2.33	3.48	2.64924e-05
2015-03-03 02:51:00	171	-0.6	82	1	27																2.33	3.48	2.82633e-05
2015-03-03 03:51:00	231	-2.2	85	1.5	27																2.33	3.48	2.82633e-05
2015-03-03 04:51:00	291	-2.2	89	1.5	27																2.33	3.48	2.82633e-05
2015-03-03 05:51:00	351	-2.8	85	1	27																2.33	3.48	2.82633e-05
2015-03-03 06:51:00	411	-3.3	85	2.1	27																2.33	3.48	2.82633e-05
2015-03-03 07:51:00	471	-3.3	85	2.6	27																2.33	3.48	2.29026e-05
2015-03-03 08:51:00	531	-0.6	85	2.1	27																2.33	3.48	2.29026e-05
2015-03-03 09:51:00	591	-0.6	85	2.6	27																2.33	3.48	2.29026e-05
2015-03-03 10:51:00	651	0	85	2.1	27																2.33	3.48	2.29026e-05
2015-03-03 11:51:00	711	0	82	0	27																2.33	3.48	2.29026e-05
2015-03-03 12:51:00	771	0.6	75	1.5	27																2.33	3.48	2.00428e-05
2015-03-03 13:51:00	831	1.1	70	2.1	27																2.33	3.48	2.00428e-05
2015-03-03 14:51:00	891	2.2	82	4.6	27																2.33	3.48	2.00428e-05
2015-03-03 15:51:00	951	2.8	73	3.6	27																2.33	3.48	2.00428e-05
2015-03-03 16:51:00	1011	2.2	82	0	27																2.33	3.48	2.00428e-05
2015-03-03 17:51:00	1071	2.2	79	2.6	27																2.33	3.48	1.53524e-05
2015-03-03 18:51:00	1131	1.1	82	3.6	27																2.33	3.48	1.53524e-05
2015-03-03 19:51:00	1191	1.1	82	2.6	27																2.33	3.48	1.53524e-05
2015-03-03 20:51:00	1251	1.1	79	1.5	27																2.33	3.48	1.53524e-05
2015-03-03 21:51:00	1311	0.6	82	2.1	27																2.33	3.48	1.53524e-05
2015-03-03 22:51:00	1371	1.7	73	1.5	27																2.33	3.48	1.77302e-05
2015-03-03 23:51:00	1431	1.1	76	3.6	27																2.33	3.48	1.77302e-05
2015-03-04 00:51:00	51	0.6	79	3.1	27																2.33	3.48	1.77302e-05
2015-03-04 01:51:00	111	1.1	73	3.6	27																2.33	3.48	1.77302e-05
2015-03-04 02:51:00	171	1.7	67	4.6	27																2.33	3.48	1.77302e-05
2015-03-04 03:51:00	231	1.7	64	5.2	27																2.33	3.48	9.35948e-06
2015-03-04 04:51:00	291	1.7	62	5.2	27																2.33	3.48	9.35948e-06
2015-03-04 05:51:00	351	1.1	67	3.6	27																2.33	3.48	9.35948e-06
2015-03-04 06:51:00	411	0.6	70	5.7	27																2.33	3.48	9.35948e-06
2015-03-04 07:51:00	471	0	69	5.2	27																2.33	3.48	9.35948e-06
2015-03-04 08:51:00	531	0.6	70	6.2	27																2.33	3.48	6.34748e-06
2015-03-04 09:51:00	591	0.6	70	3.1	27																2.33	3.48	6.34748e-06
2015-03-04 10:51:00	651	0.6	70	2.6	27																2.33	3.48	6.34748e-06
2015-03-04 11:51:00	711	1.1	67	2.6	27																2.33	3.48	6.34748e-06
2015-03-04 12:51:00	771	1.7	64	1.5	27																2.33	3.48	6.34748e-06
2015-03-04 13:51:00	831	2.2	62	1.5	27																2.33	3.48	2.95456e-06
2015-03-04 14:51:00	891	1.7	73	6.2	27																2.33	3.48	2.95456e-06
2015-03-04 15:51:00	951	1.7	73	3.1	27																2.33	3.48	2.95456e-06
2015-03-04 16:51:00	1011	1.1	82	3.6	27																2.33	3.48	2.95456e-06
2015-03-04 17:51:00	1071	0.6	82	5.7	27																2.33	3.48	2.95456e-06
2015-03-04 18:51:00	1131	0	82	3.1	27																2.33	3.48	1.9327e-06
2015-03-04 19:51:00	1191	0.6	82	8.2	27																2.33	3.48	1.9327e-06
2015-03-04 20:51:00	1251	-1.7	61	6.7	27																2.33	3.48	1.9327e-06
2015-03-04 21:51:00	1311	-2.8	66	6.7	27																2.33	3.48	1.9327e-06
2015-03-04 22:51:00	1371	-3.3	63	7.2	27																2.33	3.48	1.9327e-06
2015-03-04 23:51:00	1431	-4.4	66	6.2	27																2.33	3.48	6.54451e-07
2015-03-05 00:51:00	51	-5	63	5.2	27																2.33	3.48	6.54451e-07
2015-03-05 01:51:00	111	-5.6	62	6.2	27																2.33	3.48	6.54451e-07
2015-03-05 02:51:00	171	-6.1	62	5.2	27																2.33	3.48	6.54451e-07
2015-03-05 03:51:00	231	-6.7	65	4.1	27																2.33	3.48	6.54451e-07
2015-03-05 04:51:00	291	-7.2	62	4.6	27																2.33	3.48	1.96948e-07
2015-03-05 05:51:00	351	-7.2	59	5.2	27																2.33	3.48	1.96948e-07
2015-03-05 06:51:00	411	-7.8	62	4.6	27																2.33	3.48	1.96948e-07
2015-03-05 07:51:00	471	-7.8	57	7.2	27																2.33	3.48	1.96948e-07
2015-03-05 08:51:00	531	-8.3	59	6.2	27																2.33	3.48	1.96948e-07
2015-03-05 09:51:00	591	-7.8	57	8.8	27																2.33	3.48	2.54154e-07
2015-03-05 10:51:00	651	-7.8	54	6.7	27																2.33	3.48	2.54154e-07
2015-03-05 11:51:00	711	-7.2	54	4.6	27																2.33	3.48	2.54154e-07
2015-03-05 12:51:00	771	-7.2	49	4.1	27																2.33	3.48	2.54154e-07
2015-03-05 13:51:00	831	-6.7	47	4.6	27																2.33	3.48	2.54154e-07
2015-03-05 14:51:00	891	-5.6	44	5.7	27																2.33	3.48	1.03786e-09
2015-03-05 15:51:00	951	-5.6	46	3.1	27																2.33	3.48	1.03786e-09
2015-03-05 16:51:00	1011	-5.6	42	4.1	27																2.33	3.48	1.03786e-09
2015-03-05 17:51:00	1071	-6.1	48	2.1	27																2.33	3.48	1.03786e-09
2015-03-05 18:51:00	1131	-6.7	60	2.6	27																2.33	3.48	1.03786e-09
2015-03-05 19:51:00	1191	-7.2	65	2.6	27																2.33	3.48	1.28014e-09
2015-03-05 20:51:00	1251	-7.2	59	2.6	27																2.33	3.48	1.28014e-09
2015-03-05 21:51:00	1311	-7.8	62	0	27																2.33	3.48	1.28014e-09
2015-03-05 22:51:00	1371	-8.3	62	2.6	27																2.33	3.48	1.28014e-09
2015-03-05 23:51:00	1431	-8.3	65	2.6	27																2.33	3.48	1.28014e-09
2015-03-06 00:51:00	51	-9.4	70	2.1	27																2.33	3.48	1.25049e-11
2015-03-06 01:51:00	111	-7.8	68	2.1	27																2.33	3.48	1.25049e-11
2015-03-06 02:51:00	171	-8.3	71	3.1	27																2.33	3.48	1.25049e-11
2015-03-06 03:51:00	231	-8.9	74	2.1	27																2.33	3.48	1.25049e-11
2015-03-06 04:51:00	291	-10	74	2.6	27																2.33	3.48	1.25049e-11
2015-03-06 05:51:00	351	-11.1	73	2.1	27																2.33	3.48	1.24959e-09
2015-03-06 06:51:00	411	-11.7	77	3.1	27																2.33	3.48	1.24959e-09
2015-03-06 07:51:00	471	-12.2	73	3.1	27																2.33	3.48	1.24959e-09
2015-03-06 08:51:00	531	-13.3	80	2.6	27																2.33	3.48	1.24959e-09
2015-03-06 09:51:00	591	-11.7	58	3.6	27																2.33	3.48	1.24959e-09
2015-03-06 10:51:00	651	-10	56	5.2	27																2.33	3.48	5.98152e-10
2015-03-06 11:51:00	711	-8.9	56	5.2	27																2.33	3.48	5.98152e-10
2015-03-06 12:51:00	771	-8.3	56	4.1	27																2.33	3.48	5.98152e-10
2015-03-06 13:51:00	831	-7.2	54	5.2	27																2.33	3.48	5.98152e-10
2015-03-06 14:51:00	891	-6.1	52	3.6	27																2.33	3.48	5.98152e-10
2015-03-06 15:51:00	951	-5.6	48	4.1	27																2.33	3.48	5.66303e-11
2015-03-06 16:51:00	1011	-5.6	50	4.6	27																2.33	3.48	5.66303e-11
2015-03-06 17:51:00	1071	-6.1	52	4.1	27																2.33	3.48	5.66303e-11
2015-03-06 18:51:00	1131	-7.8	54	5.7	27																2.33	3.48	5.66303e-11
2015-03-06 19:51:00	1191	-8.9	51	3.6	27																2.33	3.48	5.66303e-11
2015-03-06 20:51:00	1251	-8.9	41	5.2	27																2.33	3.48	2.22385e-09
2015-03-06 21:51:00	1311	-8.9	39	2.6	27																2.33	3.48	2.22385e-09
2015-03-06 22:51:00	1371	-10	42	2.6	27																2.33	3.48	2.22385e-09
2015-03-06 23:51:00	1431	-10	44	2.6	27																2.33	3.48	2.22385e-09
2015-03-07 00:51:00	51	-10	42	3.6	27																2.33	3.48	2.22385e-09
2015-03-07 01:51:00	111	-10.6	42	4.1	27																2.33	3.48	3.38673e-09
2015-03-07 02:51:00	171	-12.2	50	0	27																2.33	3.48	3.38673e-09
2015-03-07 03:51:00	231	-15.6	57	0	27																2.33	3.48	3.38673e-09
2015-03-07 04:51:00	291	-16.7	62	2.1	27																2.33	3.48	3.38673e-09
2015-03-07 05:51:00	351	-16.7	59	1.5	27																2.33	3.48	3.38673e-09
2015-03-07 06:51:00	411	-17.2	62	0	27																2.33	3.48	5.31722e-14
2015-03-07 07:51:00	471	-16.7	62	1.5	27																2.33	3.48	5.31722e-14
2015-03-07 08:51:00	531	-13.3	60	0	27																2.33	3.48	5.31722e-14
2015-03-07 09:51:00	591	-11.1	58	2.6	27																2.33	3.48	5.31722e-14
2015-03-07 10:51:00	651	-10	70	3.1	27																2.33	3.48	5.31722e-14
2015-03-07 11:51:00	711	-8.9	71	4.1	27																2.33	3.48	9.0003e-14
2015-03-07 12:51:00	771	-7.8	65	1.5	27																2.33	3.48	9.0003e-14
2015-03-07 13:51:00	831	-7.2	59	1.5	27																2.33	3.48	9.0003e-14
2015-03-07 14:51:00	891	-6.7	50	3.6	27																2.33	3.48	9.0003e-14
2015-03-07 15:51:00	951	-5.6	50	2.1	27																2.33	3.48	9.0003e-14
2015-03-07 16:51:00	1011	-5	48	0	27																2.33	3.48	1.54569e-08
2015-03-07 17:51:00	1071	-5.6	50	1.5	27																2.33	3.48	1.54569e-08
2015-03-07 18:51:00	1131	-6.1	48	0	27																2.33	3.48	1.54569e-08
2015-03-07 19:51:00	1191	-8.9	59	0	27																2.33	3.48	1.54569e-08
2015-03-07 20:51:00	1251	-8.9	54	1.5	27																2.33	3.48	1.54569e-08
2015-03-07 21:51:00	1311	-11.1	56	0	27																2.33	3.48	8.75301e-09
2015-03-07 22:51:00	1371	-11.7	55	0	27																2.33	3.48	8.75301e-09
2015-03-07 23:51:00	1431	-12.2	58	0	27																2.33	3.48	8.75301e-09
2015-03-08 00:51:00	51	-11.7	61	0	27																2.33	3.48	8.75301e-09
2015-03-08 01:51:00	111	-11.1	58	0	27																2.33	3.48	8.75301e-09
2015-03-08 02:51:00	171	-13.3	60	0	27																2.33	3.48	4.45388e-08
2015-03-08 03:51:00	231	-12.2	61	0	27																2.33	3.48	4.45388e-08
2015-03-08 04:51:00	291	-13.3	63	0	27																2.33	3.48	4.45388e-08
2015-03-08 05:51:00	351	-13.3	70	0	27																2.33	3.48	4.45388e-08
2015-03-08 06:51:00	411	-13.3	70	0	27																2.33	3.48	4.45388e-08
2015-03-08 07:51:00	471	-13.9	63	0	27																2.33	3.48	2.58203e-08
2015-03-08 08:51:00	531	-12.8	67	0	27																2.33	3.48	2.58203e-08
2015-03-08 09:51:00	591	-7.8	81	2.1	27																2.33	3.48	2.58203e-08
2015-03-08 10:51:00	651	-6.7	74	0	27																2.33	3.48	2.58203e-08
2015-03-08 11:51:00	711	-5.6	60	1.5	27																2.33	3.48	2.58203e-08
2015-03-08 12:51:00	771	-4.4	46	2.6	27																2.33	3.48	1.71951e-10
2015-03-08 13:51:00	831	-3.9	40	2.6	27																2.33	3.48	1.71951e-10
2015-03-08 14:51:00	891	-3.9	44	2.1	27																2.33	3.48	1.71951e-10
2015-03-08 15:51:00	951	-3.3	42	1.5	27																2.33	3.48	1.71951e-10
2015-03-08 16:51:00	1011	-2.8	37	0	27																2.33	3.48	1.71951e-10
2015-03-08 17:51:00	1071	-2.8	44	2.1	27																2.33	3.48	1.13011e-10
2015-03-08 18:51:00	1131	-3.9	46	2.1	27																2.33	3.48	1.13011e-10
2015-03-08 19:51:00	1191	-6.1	52	4.1	27																2.33	3.48	1.13011e-10
2015-03-08 20:51:00	1251	-6.1	48	3.1	27																2.33	3.48	1.13011e-10
2015-03-08 21:51:00	1311	-6.1	50	2.6	27																2.33	3.48	1.13011e-10
2015-03-08 22:51:00	1371	-5.6	57	1.5	27																2.33	3.48	4.59588e-09
2015-03-08 23:51:00	1431	-5	57	3.6	27																2.33	3.48	4.59588e-09
2015-03-09 00:51:00	51	-5	68	2.1	27																2.33	3.48	4.59588e-09
2015-03-09 01:51:00	111	-5.6	65	2.1	27																2.33	3.48	4.59588e-09
2015-03-09 02:51:00	171	-6.7	71	1.5	27																2.33	3.48	4.59588e-09
2015-03-09 03:51:00	231	-5.6	74	2.1	27																2.33	3.48	3.97804e-09
2015-03-09 04:51:00	291	-6.7	68	3.6	27																2.33	3.48	3.97804e-09
2015-03-09 05:51:00	351	-8.3	74	3.1	27																2.33	3.48	3.97804e-09
2015-03-09 06:51:00	411	-8.3	62	2.6	27																2.33	3.48	3.97804e-09
2015-03-09 07:51:00	471	-8.3	59	2.6	27																2.33	3.48	3.97804e-09
2015-03-09 08:51:00	531	-8.3	56	2.1	27																2.33	3.48	8.98814e-08
2015-03-09 09:51:00	591	-7.2	62	2.6	27																2.33	3.48	8.98814e-08
2015-03-09 10:51:00	651	-7.8	74	2.6	27																2.33	3.48	8.98814e-08
2015-03-09 11:51:00	711	-6.7	71	2.6	27																2.33	3.48	8.98814e-08
2015-03-09 12:51:00	771	-5.6	68	3.1	27																2.33	3.48	8.98814e-08
2015-03-09 13:51:00	831	-5	68	3.1	27																2.33	3.48	1.86697e-07
2015-03-09 14:51:00	891	-4.4	68	6.2	27																2.33	3.48	1.86697e-07
2015-03-09 15:51:00	951	-3.9	69	5.2	27																2.33	3.48	1.86697e-07
2015-03-09 16:51:00	1011	-3.3	69	3.1	27																2.33	3.48	1.86697e-07
2015-03-09 17:51:00	1071	-3.3	69	3.1	27																2.33	3.48	1.86697e-07
2015-03-09 18:51:00	1131	-3.9	66	2.1	27																2.33	3.48	1.10169e-07
2015-03-09 19:51:00	1191	-4.4	66	3.6	27																2.33	3.48	1.10169e-07
2015-03-09 20:51:00	1251	-5	68	4.6	27																2.33	3.48	1.10169e-07
2015-03-09 21:51:00	1311	-5.6	78	3.6	27																2.33	3.48	1.10169e-07
2015-03-09 22:51:00	1371	-5.6	74	1.5	27																2.33	3.48	1.10169e-07
2015-03-09 23:51:00	1431	-6.1	78	2.6	27																2.33	3.48	7.16654e-07
2015-03-10 00:51:00	51	-5.6	78	2.6	27																2.33	3.48	7.16654e-07
2015-03-10 01:51:00	111	-6.7	77	2.6	27																2.33	3.48	7.16654e-07
2015-03-10 02:51:00	171	-6.7	77	3.1	27																2.33	3.48	7.16654e-07
2015-03-10 03:51:00	231	-7.2	77	3.1	27																2.33	3.48	7.16654e-07
2015-03-10 04:51:00	291	-6.7	74	4.1	27																2.33	3.48	6.54551e-07
2015-03-10 05:51:00	351	-7.2	74	3.1	27																2.33	3.48	6.54551e-07
2015-03-10 06:51:00	411	-7.2	71	4.6	27																2.33	3.48	6.54551e-07
2015-03-10 07:51:00	471	-7.8	68	4.6	27																2.33	3.48	6.54551e-07
2015-03-10 08:51:00	531	-7.2	68	6.7	27																2.33	3.48	6.54551e-07
2015-03-10 09:51:00	591	-7.2	74	5.2	27																2.33	3.48	2.16641e-06
2015-03-10 10:51:00	651	-7.2	74	5.7	27																2.33	3.48	2.16641e-06
2015-03-10 11:51:00	711	-6.7	71	6.2	27																2.33	3.48	2.16641e-06
2015-03-10 12:51:00	771	-6.1	71	6.7	27																2.33	3.48	2.16641e-06
2015-03-10 13:51:00	831	-5	71	5.2	27																2.33	3.48	2.16641e-06
2015-03-10 14:51:00	891	-3.9	63	8.2	27																2.33	3.48	3.33588e-06
2015-03-10 15:51:00	951	-2.8	53	5.2	27																2.33	3.48	3.33588e-06
2015-03-10 16:51:00	1011	-2.2	51	6.2	27																2.33	3.48	3.33588e-06
2015-03-10 17:51:00	1071	-2.2	45	6.7	27																2.33	3.48	3.33588e-06
2015-03-10 18:51:00	1131	-2.8	44	7.7	27																2.33	3.48	3.33588e-06
2015-03-10 19:51:00	1191	-2.8	41	7.2	27																2.33	3.48	2.00149e-06
2015-03-10 20:51:00	1251	-3.3	46	7.2	27																2.33	3.48	2.00149e-06
2015-03-10 21:51:00	1311	-3.3	44	7.2	27																2.33	3.48	2.00149e-06
2015-03-10 22:51:00	1371	-3.3	42	6.2	27																2.33	3.48	2.00149e-06
2015-03-10 23:51:00	1431	-3.3	44	7.7	27																2.33	3.48	2.00149e-06
2015-03-11 00:51:00	51	-3.3	42	4.1	27																2.33	3.48	4.36873e-06
2015-03-11 01:51:00	111	-2.8	39	2.6	27																2.33	3.48	4.36873e-06
2015-03-11 02:51:00	171	-3.9	44	5.2	27																2.33	3.48	4.36873e-06
2015-03-11 03:51:00	231	-3.9	44	2.1	27																2.33	3.48	4.36873e-06
2015-03-11 04:51:00	291	-3.9	42	1.5	27																2.33	3.48	4.36873e-06
2015-03-11 05:51:00	351	-3.9	42	3.1	27																2.33	3.48	5.69634e-06
2015-03-11 06:51:00	411	-3.9	42	3.1	27																2.33	3.48	5.69634e-06
2015-03-11 07:51:00	471	-3.9	40	4.6	27																2.33	3.48	5.69634e-06
2015-03-11 08:51:00	531	-4.4	42	0	27																2.33	3.48	5.69634e-06
2015-03-11 09:51:00	591	-3.3	39	1.5	27																2.33	3.48	5.69634e-06
2015-03-11 10:51:00	651	-2.2	36	3.1	27																2.33	3.48	9.74159e-06
2015-03-11 11:51:00	711	-1.7	37	5.7	27																2.33	3.48	9.74159e-06
2015-03-11 12:51:00	771	-1.1	36	6.2	27																2.33	3.48	9.74159e-06
2015-03-11 13:51:00	831	0	33	5.2	27																2.33	3.48	9.74159e-06
2015-03-11 14:51:00	891	0.6	30	6.7	27																2.33	3.48	9.74159e-06
2015-03-11 15:51:00	951	0.6	32	5.2	27																2.33	3.48	1.35328e-05
2015-03-11 16:51:00	1011	0.6	33	3.1	27																2.33	3.48	1.35328e-05
2015-03-11 17:51:00	1071	0	33	5.2	27																2.33	3.48	1.35328e-05
2015-03-11 18:51:00	1131	-1.1	34	3.1	27																2.33	3.48	1.35328e-05
2015-03-11 19:51:00	1191	-2.2	34	1.5	27																2.33	3.48	1.35328e-05
2015-03-11 20:51:00	1251	-3.3	29	4.1	27																2.33	3.48	1.50594e-05
2015-03-11 21:51:00	1311	-3.9	26	2.6	27																2.33	3.48	1.50594e-05
2015-03-11 22:51:00	1371	-4.4	27	2.6	27																2.33	3.48	1.50594e-05
2015-03-11 23:51:00	1431	-5	33	4.1	27																2.33	3.48	1.50594e-05
2015-03-12 00:51:00	51	-6.1	31	2.6	27																2.33	3.48	1.50594e-05
2015-03-12 01:51:00	111	-7.8	39	0	27																2.33	3.48	1.65653e-05
2015-03-12 02:51:00	171	-7.8	41	2.1	27																2.33	3.48	1.65653e-05
2015-03-12 03:51:00	231	-10.6	51	0	27																2.33	3.48	1.65653e-05
2015-03-12 04:51:00	291	-12.8	58	0	27																2.33	3.48	1.65653e-05
2015-03-12 05:51:00	351	-10.6	36	1.5	27																2.33	3.48	1.65653e-05
2015-03-12 06:51:00	411	-10.6	56	1.5	27																2.33	3.48	1.70738e-05
2015-03-12 07:51:00	471	-8.9	62	2.1	27																2.33	3.48	1.70738e-05
2015-03-12 08:51:00	531	-8.3	71	0	27																2.33	3.48	1.70738e-05
2015-03-12 09:51:00	591	-7.2	68	2.1	27																2.33	3.48	1.70738e-05
2015-03-12 10:51:00	651	-6.1	62	2.6	27																2.33	3.48	1.70738e-05
2015-03-12 11:51:00	711	-5.6	65	5.2	27																2.33	3.48	1.61918e-05
2015-03-12 12:51:00	771	-5	57	3.6	27																2.33	3.48	1.61918e-05
2015-03-12 13:51:00	831	-4.4	55	4.1	27																2.33	3.48	1.61918e-05
2015-03-12 14:51:00	891	-3.9	50	4.1	27																2.33	3.48	1.61918e-05
2015-03-12 15:51:00	951	-3.3	48	3.6	27																2.33	3.48	1.61918e-05
2015-03-12 16:51:00	1011	-2.8	51	4.1	27																2.33	3.48	7.60947e-06
2015-03-12 17:51:00	1071	-3.3	46	4.1	27																2.33	3.48	7.60947e-06
2015-03-12 18:51:00	1131	-3.3	46	4.1	27																2.33	3.48	7.60947e-06
2015-03-12 19:51:00	1191	-3.3	42	2.6	27																2.33	3.48	7.60947e-06
2015-03-12 20:51:00	1251	-3.3	44	2.6	27																2.33	3.48	7.60947e-06
2015-03-12 21:51:00	1311	-3.3	44	3.6	27																2.33	3.48
2015-03-12 22:51:00	1371	-3.3	44	3.1	27																2.33	3.48
2015-03-12 23:51:00	1431	-4.4	50	4.6	27																2.33	3.48
2015-03-13 00:51:00	51	-5	65	4.6	27																2.33	3.48
2015-03-13 01:51:00	111	-5	74	3.1	27																2.33	3.48
2015-03-13 02:51:00	171	-5	74	4.1	27																2.33	3.48
2015-03-13 03:51:00	231	-5	74	3.1	27																2.33	3.48
2015-03-13 04:51:00	291	-5	78	1.5	27																2.33	3.48
2015-03-13 05:51:00	351	-5	78	3.6	27																2.33	3.48
2015-03-13 06:51:00	411	-5.6	81	3.1	27																2.33	3.48
2015-03-13 07:51:00	471	-5.6	81	5.2	27																2.33	3.48
2015-03-13 08:51:00	531	-5	78	2.6	27																2.33	3.48
2015-03-13 09:51:00	591	-5	78	3.6	27																2.33	3.48
2015-03-13 10:51:00	651	-4.4	78	3.6	27																2.33	3.48
2015-03-13 11:51:00	711	-3.9	75	1.5	27																2.33	3.48
2015-03-13 12:51:00	771	-3.9	75	2.1	27																2.33	3.48
2015-03-13 13:51:00	831	-3.3	78	4.1	27																2.33	3.48
2015-03-13 14:51:00	891	-2.8	75	1.5	27																2.33	3.48
2015-03-13 15:51:00	951	-2.2	75	2.6	27																2.33	3.48
2015-03-13 16:51:00	1011	-2.2	72	3.1	27																2.33	3.48
2015-03-13 17:51:00	1071	-2.2	72	2.6	27																2.33	3.48
2015-03-13 18:51:00	1131	-2.8	75	2.1	27																2.33	3.48
2015-03-13 19:51:00	1191	-5	85	2.1	27																2.33	3.48
2015-03-13 20:51:00	1251	-7.2	84	0	27																2.33	3.48
2015-03-13 21:51:00	1311	-4.4	81	2.6	27																2.33	3.48
2015-03-13 22:51:00	1371	-5.6	85	1.5	27																2.33	3.48
2015-03-13 23:51:00	1431	-5.6	85	2.6	27																2.33	3.48
2015-03-14 00:51:00	51	-5	81	3.1	27																2.33	3.48
2015-03-14 01:51:00	111	-7.2	84	2.1	27																2.33	3.48
2015-03-14 02:51:00	171	-7.2	81	0	27																2.33	3.48
2015-03-14 03:51:00	231	-7.2	77	2.1	27																2.33	3.48
2015-03-14 04:51:00	291	-7.8	81	1.5	27																2.33	3.48
2015-03-14 05:51:00	351	-7.8	77	1.5	27																2.33	3.48
2015-03-14 06:51:00	411	-6.7	81	0	27																2.33	3.48
2015-03-14 07:51:00	471	-3.9	78	1.5	27																2.33	3.48
2015-03-14 08:51:00	531	-3.9	78	0	27																2.33	3.48
2015-03-14 09:51:00	591	-3.3	78	2.6	27																2.33	3.48
2015-03-14 10:51:00	651	-2.2	75	2.6	27																2.33	3.48
2015-03-14 11:51:00	711	-1.7	69	3.6	27																2.33	3.48
2015-03-14 12:51:00	771	-1.7	66	3.1	27																2.33	3.48
2015-03-14 13:51:00	831	-2.2	72	3.6	27																2.33	3.48
2015-03-14 14:51:00	891	-2.2	69	2.6	27																2.33	3.48
2015-03-14 15:51:00	951	-2.8	72	3.1	27																2.33	3.48
2015-03-14 16:51:00	1011	-2.2	75	3.1	27																2.33	3.48
2015-03-14 17:51:00	1071	-2.2	72	2.1	27																2.33	3.48
2015-03-14 18:51:00	1131	-2.2	72	0	27																2.33	3.48
2015-03-14 19:51:00	1191	-2.2	72	3.1	27																2.33	3.48
2015-03-14 20:51:00	1251	-2.2	72	2.1	27																2.33	3.48
2015-03-14 21:51:00	1311	-2.8	72	0	27																2.33	3.48
2015-03-14 22:51:00	1371	-3.3	78	0	27																2.33	3.48
2015-03-14 23:51:00	1431	-3.3	78	2.1	27																2.33	3.48
2015-03-15 00:51:00	51	-3.3	78	4.1	27																2.33	3.48
2015-03-15 01:51:00	111	-2.8	78	2.6	27																2.33	3.48
2015-03-15 02:51:00	171	-2.8	78	2.1	27																2.33	3.48
2015-03-15 03:51:00	231	-2.8	81	4.6	27																2.33	3.48
2015-03-15 04:51:00	291	-2.8	81	3.6	27																2.33	3.48
2015-03-15 05:51:00	351	-2.8	85	2.6	27																2.33	3.48
2015-03-15 06:51:00	411	-2.8	88	2.6	27																2.33	3.48
2015-03-15 07:51:00	471	-2.8	92	2.1	27																2.33	3.48
2015-03-15 08:51:00	531	-2.8	85	3.1	27																2.33	3.48
2015-03-15 09:51:00	591	-2.8	85	3.6	27																2.33	3.48
2015-03-15 10:51:00	651	-2.8	85	5.7	27																2.33	3.48
2015-03-15 11:51:00	711	-2.8	81	6.2	27																2.33	3.48
2015-03-15 12:51:00	771	-2.2	82	4.1	27																2.33	3.48
2015-03-15 13:51:00	831	-1.7	82	2.6	27																2.33	3.48
2015-03-15 14:51:00	891	-0.6	78	5.2	27																2.33	3.48
2015-03-15 15:51:00	951	0	75	3.6	27																2.33	3.48
2015-03-15 16:51:00	1011	3.3	60	7.7	27																2.33	3.48
2015-03-15 17:51:00	1071	4.4	55	6.2	27																2.33	3.48
2015-03-15 18:51:00	1131	3.3	62	8.2	27																2.33	3.48
2015-03-15 19:51:00	1191	2.8	67	6.2	27																2.33	3.48
2015-03-15 20:51:00	1251	2.2	79	8.8	27																2.33	3.48
2015-03-15 21:51:00	1311	2.2	82	6.7	27																2.33	3.48
2015-03-15 22:51:00	1371	2.2	73	6.2	27																2.33	3.48
2015-03-15 23:51:00	1431	2.8	67	5.2	27																2.33	3.48
2015-03-16 00:51:00	51	2.8	67	5.2	27																2.33	3.48
2015-03-16 01:51:00	111	2.8	62	5.7	27																2.33	3.48
2015-03-16 02:51:00	171	2.2	70	3.6	27																2.33	3.48
2015-03-16 03:51:00	231	2.2	70	4.6	27																2.33	3.48
2015-03-16 04:51:00	291	2.2	73	5.2	27																2.33	3.48
2015-03-16 05:51:00	351	2.2	70	8.8	27																2.33	3.48
2015-03-16 06:51:00	411	2.2	73	7.2	27																2.33	3.48
2015-03-16 07:51:00	471	2.2	70	6.2	27																2.33	3.48
2015-03-16 08:51:00	531	2.2	73	7.2	27																2.33	3.48
2015-03-16 09:51:00	591	2.8	70	6.7	27																2.33	3.48
2015-03-16 10:51:00	651	3.3	65	6.7	27																2.33	3.48
2015-03-16 11:51:00	711	3.3	65	7.2	27																2.33	3.48
2015-03-16 12:51:00	771	4.4	60	6.7	27																2.33	3.48
2015-03-16 13:51:00	831	5	58	5.7	27																2.33	3.48
2015-03-16 14:51:00	891	5	58	7.2	27																2.33	3.48
2015-03-16 15:51:00	951	5	51	7.7	27																2.33	3.48
2015-03-16 16:51:00	1011	5	53	7.2	27																2.33	3.48
2015-03-16 17:51:00	1071	3.9	55	5.2	27																2.33	3.48
2015-03-16 18:51:00	1131	3.3	57	4.1	27																2.33	3.48
2015-03-16 19:51:00	1191	2.8	55	5.2	27																2.33	3.48
2015-03-16 20:51:00	1251	2.2	55	8.2	27																2.33	3.48
2015-03-16 21:51:00	1311	1.7	57	7.2	27																2.33	3.48
2015-03-16 22:51:00	1371	1.7	57	6.2	27																2.33	3.48
2015-03-16 23:51:00	1431	1.1	59	6.7	27																2.33	3.48
2015-03-17 00:51:00	51	1.1	59	8.2	27																2.33	3.48
2015-03-17 01:51:00	111	1.1	59	7.2	27																2.33	3.48
2015-03-17 02:51:00	171	0.6	61	5.7	27																2.33	3.48
2015-03-17 03:51:00	231	0.6	61	5.2	27																2.33	3.48
2015-03-17 04:51:00	291	0	67	4.1	27																2.33	3.48
2015-03-17 05:51:00	351	0	64	5.2	27																2.33	3.48
2015-03-17 06:51:00	411	0	64	3.6	27																2.33	3.48
2015-03-17 07:51:00	471	-1.1	69	3.1	27																2.33	3.48
2015-03-17 08:51:00	531	-1.7	72	2.6	27																2.33	3.48
2015-03-17 09:51:00	591	0	67	2.6	27																2.33	3.48
2015-03-17 10:51:00	651	0	64	0	27																2.33	3.48
2015-03-17 11:51:00	711	2.2	48	3.1	27																2.33	3.48
2015-03-17 12:51:00	771	2.2	42	5.2	27																2.33	3.48
2015-03-17 13:51:00	831	2.8	37	3.6	27																2.33	3.48
2015-03-17 14:51:00	891	0.6	59	3.6	27																2.33	3.48
2015-03-17 15:51:00	951	1.1	42	3.6	27																2.33	3.48
2015-03-17 16:51:00	1011	0.6	45	3.6	27																2.33	3.48
2015-03-17 17:51:00	1071	0.6	54	2.6	27																2.33	3.48
2015-03-17 18:51:00	1131	0	52	3.1	27																2.33	3.48
2015-03-17 19:51:00	1191	-2.2	56	0	27																2.33	3.48
2015-03-17 20:51:00	1251	-2.2	53	0	27																2.33	3.48
2015-03-17 21:51:00	1311	-5.6	65	1.5	27																2.33	3.48
2015-03-17 22:51:00	1371	-5.6	65	0	27																2.33	3.48
2015-03-17 23:51:00	1431	-6.1	68	0	27																2.33	3.48
2015-03-18 00:51:00	51	-5	60	0	27																2.33	3.48
2015-03-18 01:51:00	111	-6.7	65	0	27																2.33	3.48
2015-03-18 02:51:00	171	-7.2	71	0	27																2.33	3.48
2015-03-18 03:51:00	231	-7.2	71	0	27																2.33	3.48
2015-03-18 04:51:00	291	-8.9	77	0	27																2.33	3.48
2015-03-18 05:51:00	351	-10.6	73	2.1	27																2.33	3.48
2015-03-18 06:51:00	411	-10	80	0	27																2.33	3.48
2015-03-18 07:51:00	471	-8.9	74	2.1	27																2.33	3.48
2015-03-18 08:51:00	531	-7.8	68	2.1	27																2.33	3.48
2015-03-18 09:51:00	591	-4.4	53	3.6	27																2.33	3.48
2015-03-18 10:51:00	651	-3.3	46	5.7	27																2.33	3.48
2015-03-18 11:51:00	711	-2.8	47	5.2	27																2.33	3.48
2015-03-18 12:51:00	771	-2.2	41	5.2	27																2.33	3.48
2015-03-18 13:51:00	831	-1.7	45	4.6	27																2.33	3.48
2015-03-18 14:51:00	891	0.6	38	4.6	27																2.33	3.48
2015-03-18 15:51:00	951	1.1	37	3.6	27																2.33	3.48
2015-03-18 16:51:00	1011	0.6	42	3.1	27																2.33	3.48
2015-03-18 17:51:00	1071	0	40	3.6	27																2.33	3.48
2015-03-18 18:51:00	1131	-0.6	43	2.6	27																2.33	3.48
2015-03-18 19:51:00	1191	-1.1	51	3.6	27																2.33	3.48
2015-03-18 20:51:00	1251	-1.7	47	3.6	27																2.33	3.48
2015-03-18 21:51:00	1311	-1.7	47	2.1	27																2.33	3.48
2015-03-18 22:51:00	1371	-1.7	43	0	27																2.33	3.48
2015-03-18 23:51:00	1431	-1.7	45	2.6	27																2.33	3.48
2015-03-19 00:51:00	51	-2.2	49	1.5	27																2.33	3.48
2015-03-19 01:51:00	111	-2.8	49	2.6	27																2.33	3.48
2015-03-19 02:51:00	171	-2.8	53	2.1	27																2.33	3.48
2015-03-19 03:51:00	231	-3.3	58	3.1	27																2.33	3.48
2015-03-19 04:51:00	291	-4.4	68	3.1	27																2.33	3.48
2015-03-19 05:51:00	351	-5	63	3.1	27																2.33	3.48
2015-03-19 06:51:00	411	-5.6	62	5.2	27																2.33	3.48
2015-03-19 07:51:00	471	-5.6	68	4.1	27																2.33	3.48
2015-03-19 08:51:00	531	-5	68	3.6	27																2.33	3.48
2015-03-19 09:51:00	591	-3.9	63	5.7	27																2.33	3.48
2015-03-19 10:51:00	651	-2.8	61	3.6	27																2.33	3.48
2015-03-19 11:51:00	711	-1.7	58	5.2	27																2.33	3.48
2015-03-19 12:51:00	771	-0.6	56	4.6	27																2.33	3.48
2015-03-19 13:51:00	831	0	54	6.2	27																2.33	3.48
2015-03-19 14:51:00	891	0.6	56	4.6	27																2.33	3.48
2015-03-19 15:51:00	951	0.6	56	4.6	27																2.33	3.48
2015-03-19 16:51:00	1011	0.6	61	3.6	27																2.33	3.48
2015-03-19 17:51:00	1071	0.6	56	4.1	27																2.33	3.48
2015-03-19 18:51:00	1131	0.6	61	3.1	27																2.33	3.48
2015-03-19 19:51:00	1191	0	64	4.1	27																2.33	3.48
2015-03-19 20:51:00	1251	0	64	3.1	27																2.33	3.48
2015-03-19 21:51:00	1311	-0.6	64	3.1	27																2.33	3.48
2015-03-19 22:51:00	1371	-1.1	66	4.6	27																2.33	3.48
2015-03-19 23:51:00	1431	-1.7	66	3.1	27																2.33	3.48
2015-03-20 00:51:00	51	-2.2	66	3.1	27																2.33	3.48
2015-03-20 01:51:00	111	-2.8	69	4.1	27																2.33	3.48
2015-03-20 02:51:00	171	-2.8	69	3.6	27																2.33	3.48
2015-03-20 03:51:00	231	-3.3	69	4.1	27																2.33	3.48
2015-03-20 04:51:00	291	-3.9	69	3.6	27																2.33	3.48
2015-03-20 05:51:00	351	-4.4	68	3.1	27																2.33	3.48
2015-03-20 06:51:00	411	-4.4	68	3.1	27																2.33	3.48
2015-03-20 07:51:00	471	-5	71	4.1	27																2.33	3.48
2015-03-20 08:51:00	531	-4.4	71	3.1	27																2.33	3.48
2015-03-20 09:51:00	591	-3.9	69	4.1	27																2.33	3.48
2015-03-20 10:51:00	651	-2.2	61	4.6	27																2.33	3.48
2015-03-20 11:51:00	711	-1.1	58	4.1	27																2.33	3.48
2015-03-20 12:51:00	771	0	49	5.2	27																2.33	3.48
2015-03-20 13:51:00	831	1.1	48	5.2	27																2.33	3.48
2015-03-20 14:51:00	891	1.7	50	3.6	27																2.33	3.48
2015-03-20 15:51:00	951	2.8	48	4.1	27																2.33	3.48
2015-03-20 16:51:00	1011	2.8	50	3.6	27																2.33	3.48
2015-03-20 17:51:00	1071	2.2	52	3.1	27																2.33	3.48
2015-03-20 18:51:00	1131	1.7	54	2.1	27																2.33	3.48
2015-03-20 19:51:00	1191	0.6	54	3.1	27																2.33	3.48
2015-03-20 20:51:00	1251	0	56	3.1	27																2.33	3.48
2015-03-20 21:51:00	1311	-0.6	59	2.1	27																2.33	3.48
2015-03-20 22:51:00	1371	-1.1	61	2.6	27																2.33	3.48
2015-03-20 23:51:00	1431	-1.1	61	3.6	27																2.33	3.48
2015-03-21 00:51:00	51	-1.7	61	2.6	27																2.33	3.48
2015-03-21 01:51:00	111	-2.8	63	2.6	27																2.33	3.48
2015-03-21 02:51:00	171	-3.3	63	2.1	27																2.33	3.48
2015-03-21 03:51:00	231	-3.9	63	1.5	27																2.33	3.48
2015-03-21 04:51:00	291	-3.9	60	3.1	27																2.33	3.48
2015-03-21 05:51:00	351	-5	63	3.1	27																2.33	3.48
2015-03-21 06:51:00	411	-5	63	1.5	27																2.33	3.48
2015-03-21 07:51:00	471	-5.6	62	1.5	27																2.33	3.48
2015-03-21 08:51:00	531	-4.4	63	3.6	27																2.33	3.48
2015-03-21 09:51:00	591	-3.9	60	2.6	27																2.33	3.48
2015-03-21 10:51:00	651	-2.8	53	2.6	27																2.33	3.48
2015-03-21 11:51:00	711	-2.2	53	3.1	27																2.33	3.48
2015-03-21 12:51:00	771	-1.7	53	2.1	27																2.33	3.48
2015-03-21 13:51:00	831	-0.6	49	2.1	27																2.33	3.48
2015-03-21 14:51:00	891	0	49	3.6	27																2.33	3.48
2015-03-21 15:51:00	951	0.6	52	3.1	27																2.33	3.48
2015-03-21 16:51:00	1011	0.6	52	3.1	27																2.33	3.48
2015-03-21 17:51:00	1071	0.6	59	3.1	27																2.33	3.48
2015-03-21 18:51:00	1131	-0.6	64	3.6	27																2.33	3.48
2015-03-21 19:51:00	1191	-1.7	72	3.1	27																2.33	3.48
2015-03-21 20:51:00	1251	-1.1	69	3.6	27																2.33	3.48
2015-03-21 21:51:00	1311	-2.2	72	0	27																2.33	3.48
2015-03-21 22:51:00	1371	-3.3	75	2.1	27																2.33	3.48
2015-03-21 23:51:00	1431	-2.2	63	3.1	27																2.33	3.48
2015-03-22 00:51:00	51	-2.8	61	0	27																2.33	3.48
2015-03-22 01:51:00	111	-3.3	63	2.1	27																2.33	3.48
2015-03-22 02:51:00	171	-5	63	2.6	27																2.33	3.48
2015-03-22 03:51:00	231	-5.6	60	2.1	27																2.33	3.48
2015-03-22 04:51:00	291	-6.1	60	2.6	27																2.33	3.48
2015-03-22 05:51:00	351	-6.7	60	3.1	27																2.33	3.48
2015-03-22 06:51:00	411	-6.7	60	3.1	27																2.33	3.48
2015-03-22 07:51:00	471	-6.7	68	4.1	27																2.33	3.48
2015-03-22 08:51:00	531	-5	50	3.1	27																2.33	3.48
2015-03-22 09:51:00	591	-4.4	55	3.1	27																2.33	3.48
2015-03-22 10:51:00	651	-3.3	51	3.1	27																2.33	3.48
2015-03-22 11:51:00	711	-2.8	49	5.7	27																2.33	3.48
2015-03-22 12:51:00	771	-2.2	49	3.1	27																2.33	3.48
2015-03-22 13:51:00	831	-2.2	49	3.6	27																2.33	3.48
2015-03-22 14:51:00	891	-2.2	49	3.1	27																2.33	3.48
2015-03-22 15:51:00	951	-0.6	43	2.6	27																2.33	3.48
2015-03-22 16:51:00	1011	-0.6	51	3.6	27																2.33	3.48
2015-03-22 17:51:00	1071	-0.6	54	4.1	27																2.33	3.48
2015-03-22 18:51:00	1131	-1.7	58	4.1	27																2.33	3.48
2015-03-22 19:51:00	1191	-2.8	69	3.1	27																2.33	3.48
2015-03-22 20:51:00	1251	-1.7	43	4.6	27																2.33	3.48
2015-03-22 21:51:00	1311	-3.3	40	3.6	27																2.33	3.48
2015-03-22 22:51:00	1371	-4.4	48	4.6	27																2.33	3.48
2015-03-22 23:51:00	1431	-5	40	5.2	27																2.33	3.48
2015-03-23 00:51:00	51	-6.1	41	4.6	27																2.33	3.48
2015-03-23 01:51:00	111	-7.2	43	2.6	27																2.33	3.48
2015-03-23 02:51:00	171	-7.8	45	2.1	27																2.33	3.48
2015-03-23 03:51:00	231	-7.8	31	3.1	27																2.33	3.48
2015-03-23 04:51:00	291	-8.3	34	2.1	27																2.33	3.48
2015-03-23 05:51:00	351	-8.9	33	4.1	27																2.33	3.48
2015-03-23 06:51:00	411	-8.9	35	3.1	27																2.33	3.48
2015-03-23 07:51:00	471	-7.8	34	5.2	27																2.33	3.48
2015-03-23 08:51:00	531	-7.2	32	5.2	27																2.33	3.48
2015-03-23 09:51:00	591	-6.7	31	3.6	27																2.33	3.48
2015-03-23 10:51:00	651	-6.1	34	3.6	27																2.33	3.48
2015-03-23 11:51:00	711	-5	33	3.1	27																2.33	3.48
2015-03-23 12:51:00	771	-4.4	32	3.1	27																2.33	3.48
2015-03-23 13:51:00	831	-4.4	29	4.1	27																2.33	3.48
2015-03-23 14:51:00	891	-3.9	28	2.1	27																2.33	3.48
2015-03-23 15:51:00	951	-3.3	27	2.6	27																2.33	3.48
2015-03-23 16:51:00	1011	-3.3	34	3.6	27																2.33	3.48
2015-03-23 17:51:00	1071	-2.8	43	2.1	27																2.33	3.48
2015-03-23 18:51:00	1131	-3.3	35	5.7	27																2.33	3.48
2015-03-23 19:51:00	1191	-4.4	27	5.2	27																2.33	3.48
2015-03-23 20:51:00	1251	-5.6	31	5.2	27																2.33	3.48
2015-03-23 21:51:00	1311	-6.7	31	6.2	27																2.33	3.48
2015-03-23 22:51:00	1371	-7.8	34	2.6	27																2.33	3.48
2015-03-23 23:51:00	1431	-8.3	30	2.6	27																2.33	3.48
2015-03-24 00:51:00	51	-9.4	33	2.6	27																2.33	3.48
2015-03-24 01:51:00	111	-10	35	4.6	27																2.33	3.48
2015-03-24 02:51:00	171	-10.6	36	4.1	27																2.33	3.48
2015-03-24 03:51:00	231	-11.1	40	4.1	27																2.33	3.48
2015-03-24 04:51:00	291	-12.2	41	2.6	27																2.33	3.48
2015-03-24 05:51:00	351	-12.8	45	2.6	27																2.33	3.48
2015-03-24 06:51:00	411	-12.2	46	3.6	27																2.33	3.48
2015-03-24 07:51:00	471	-11.7	50	3.1	27																2.33	3.48
2015-03-24 08:51:00	531	-11.1	46	2.6	27																2.33	3.48
2015-03-24 09:51:00	591	-10	46	4.1	27																2.33	3.48
2015-03-24 10:51:00	651	-9.4	42	3.6	27																2.33	3.48
2015-03-24 11:51:00	711	-8.9	43	3.6	27																2.33	3.48
2015-03-24 12:51:00	771	-8.3	47	3.1	27																2.33	3.48
2015-03-24 13:51:00	831	-7.8	68	4.6	27																2.33	3.48
2015-03-24 14:51:00	891	-7.2	68	6.7	27																2.33	3.48
2015-03-24 15:51:00	951	-6.7	65	4.1	27																2.33	3.48
2015-03-24 16:51:00	1011	-6.1	68	6.2	27																2.33	3.48
2015-03-24 17:51:00	1071	-5.6	65	6.2	27																2.33	3.48
2015-03-24 18:51:00	1131	-6.7	71	4.6	27																2.33	3.48
2015-03-24 19:51:00	1191	-6.7	71	4.1	27																2.33	3.48
2015-03-24 20:51:00	1251	-6.7	71	3.6	27																2.33	3.48
2015-03-24 21:51:00	1311	-6.7	71	5.2	27																2.33	3.48
2015-03-24 22:51:00	1371	-6.7	71	4.6	27																2.33	3.48
2015-03-24 23:51:00	1431	-6.7	71	5.2	27																2.33	3.48
2015-03-25 00:51:00	51	-6.7	74	3.1	27																2.33	3.48
2015-03-25 01:51:00	111	-7.2	74	5.2	27																2.33	3.48
2015-03-25 02:51:00	171	-7.2	74	6.2	27																2.33	3.48
2015-03-25 03:51:00	231	-7.2	74	5.2	27																2.33	3.48
2015-03-25 04:51:00	291	-7.2	74	4.1	27																2.33	3.48
2015-03-25 05:51:00	351	-7.2	77	5.2	27																2.33	3.48
2015-03-25 06:51:00	411	-7.2	74	4.1	27																2.33	3.48
[truncated: 6,761 more rows]
