# Supplementary material for: Organic solar powered greenhouse performance optimization and global economic opportunity
Source: Royal Society of Chemistry journal article supplement (doi:10.1039/d1ee03474j), 2022-01-01
Supplement: d1ee03474j2.pdf [file d1ee03474j2.pdf]

**SUPPORTING INFORMATION**

Organic solar powered greenhouse performance optimization and global  
economic opportunity

Eshwar Ravishankar,<sup>a</sup> Ronald E. Booth,<sup>a</sup> Joseph A. Hollingsworth,<sup>b</sup> Harald Ade,<sup>c</sup> Heike  
Sederoff,<sup>d</sup> Joseph F. DeCarolis<sup>b</sup> and Brendan T. O'Connor<sup>a\*</sup>

<sup>a</sup> Department of Mechanical and Aerospace Engineering, and Organic and Carbon Electronics  
Laboratories (ORaCEL), NC State University, Raleigh, NC, 27695, USA.

<sup>b</sup> Department of Civil, Construction, and Environmental Engineering, NC State University,  
Raleigh, NC, 27695, USA.

<sup>c</sup> Department of Physics, and ORaCEL, NC State University, Raleigh, NC, 27695, USA.

<sup>d</sup> Department of Plant and Microbial Biology, NC State University, Raleigh, NC, 27607, USA.

\* Correspondence and Lead Contact: [btoconno@ncsu.edu](mailto:btoconno@ncsu.edu)

## 1. Description of lettuce growth model

The plant growth model considered here is made of sub-models representing each aspect of biomass production such as total leaf area expansion, impact of environmental parameters that include sunlight, temperature and CO<sub>2</sub>, photosynthesis, and associated growth and respiration losses required to maintain cells, their biostructure and ionic gradients. The flowchart depicting the relation between these parameters leading to biomass production is shown in **Figure 1** and the underlying mathematical equations and parameters involved are highlighted here.

### 1.1. Determining orientation and light interception by leaves

Sunlight absorbed by the plants depends on the orientation of the leaves. This is modelled based on the assumption that the plant canopy will be considered as consisting of leaves at different depths as shown in **Figure S1**. Each leaf is capable of absorbing and scattering light and leaves can have various configurations.<sup>1</sup> Each configuration has a certain absorption and scattering defined by a plant effective extinction coefficient (PEEC). PEEC is defined as the ratio of area of leaf to the area of the shadow cast by incident sunlight.<sup>2</sup> This is a measure of interception of light by a leaf. Area of shadow cast changes depending on the angle of incidence of the sunlight and hence, the value of PEEC can vary based on leaf configuration. A horizontal leaf configuration has a PEEC equal to 1 which denotes the area of leaf being equal to area of shade. Similarly, values greater than or less than 1 denotes a leaf area greater or less than area of shade, respectively. PEEC values differ between diffuse and direct solar radiation. While the direct solar radiation comes only in one direction at a particular instant, diffuse radiation is assumed to be uniformly distributed across all directions as depicted in **Figure S1**. Here, for direct solar radiation, we assume a horizontal leaf configuration with the leaves capable of scattering part of the light. Extinction coefficient for direct radiation assuming scattering is derived considering two layers of the plant canopy with each layer consisting of leaves in a horizontal configuration.<sup>1</sup> Light flux leaving layer  $n$  and  $n+1$  and travelling in the downward direction is given by,

$$\Phi_{d,n+1} = \Phi_{d,n} \left( (1 - \Delta L) + T_{leaf} \Delta L \right) + \Phi_{u,n+1} \rho_{leaf} \Delta L, \quad (1)$$

$$\Phi_{d,n+1} = \Phi_{u,n+1} \left( (1 - \Delta L) + T_{leaf} \Delta L \right) + \Phi_{d,n} \rho_{leaf} \Delta L. \quad (2)$$

where  $\Phi_{d,n+1}$  and  $\Phi_{d,n}$  denotes light flux travelling through layer  $n$  and  $n+1$  respectively in the downward direction,  $\Phi_{u,n+1}$  and  $\Phi_{u,n}$  denotes light flux travelling through layer  $n$  and  $n+1$

respectively in the upward direction,  $\Delta L$  denotes gap between leaves, R and T denote reflectance and transmittance respectively. Solving equation (1) and equation (2) simultaneously, The PEEC for direct radiation assuming scattering is given by,

$$PEEC_{\text{direct}} = PEEC_{\text{bl}}\sqrt{1 - \sigma}, \quad (3)$$

where  $PEEC_{\text{bl}}$  is the extinction coefficient of leaves with no scattering and has value of 1,  $\sigma$  is the scattering coefficient which is defined as the sum of reflectance (R) and transmittance (T) of a single healthy leaf.

In the case of diffuse radiation, sunlight is incident on the leaves from all directions in the horizon and each light will be intercepted at a different rate based on the extinction coefficient at that angle of incidence. Here, the leaves are assumed to be distributed in a spherical distribution. Within the spherical configuration, the leaves are randomly oriented and have different PEECs. Overall, the configuration is assigned a PEEC of 0.5.<sup>1</sup> A realistic distribution of sky brightness for diffuse radiation is given by the isotropic light distribution model.<sup>1</sup> It is assumed that diffuse radiation is averaged across three sky zones. These three sky zones are assumed to supply a fraction of 0.178, 0.514 and 0.308 of the diffuse radiation at an angle of incidence of 15°, 45° and 75°, respectively. At each angle of incidence, PEEC for leaf in a spherical configuration is given by,

$$PEEC_{\text{spher},I} = \frac{0.5}{\sin(\beta)}, \quad (4)$$

where  $\beta$  is the angle of incidence of sunlight on the leaf.

Transmitted flux is given by,

$$\Phi_T = \Phi_I((0.178 \exp(-1.93L) + (0.514 \exp(-0.707L)) + (0.308 \exp(-0.518L))), \quad (5)$$

where  $\Phi_T$  denotes light flux transmitted through a leaf,  $\Phi_I$  denotes light flux incident on a leaf, L denotes leaf area index. 1.93, 0.707 and 0.518 are PEECs for a leaf in a spherical configuration at angle of incidences 15°, 45° and 75°. From equation (5), PEEC of diffuse radiation accounting for scattering from the leaves,

$$PEEC_{\text{diff}} = \frac{-\ln\left(\frac{\Phi_{\text{transmitted}}}{\Phi_{\text{incident}}}\right)}{L} \sqrt{1 - \sigma}. \quad (6)$$

## 1.2. Light absorption by plant canopy

To model light absorption by the plant canopy, we first assume that only 75 % of total incident light on a greenhouse is transmitted because of losses from the greenhouse structure.<sup>3</sup> Total light incident and transmitted into the greenhouse structure is computed using the transfer matrix model

as previously described.<sup>4</sup> The computed PEEC is utilized towards obtaining sunlight absorbed by the plant canopy. Light absorption occurs through by leaves directly exposed to sunlight as well as by leaves that are shaded. Leaves exposed to light receive both direct and diffuse radiation while the shaded leaves receive scattered radiation from leaves exposed to both direct and diffuse radiation.<sup>1</sup> These components are shown in **Figure S1**.

If the absorbed light and associated photosynthesis are to be computed for the complete plant canopy, the absorption per leaf area must be known at several depths in the plant. This is done through a gaussian integration method, where light absorption calculation is computed per leaf area at five different depths in a plant canopy and integrated across the total leaf area index of the plant to determine light absorption and hence photosynthesis.<sup>5</sup> Within the plant canopy, the leaf area is selected symmetrically at different height fractions, with the maximum height being a value of 1. At each height, a weight is added to determine the fraction of total light absorbed at that level. Total absorption per unit leaf area per canopy depth for diffuse sunlight is given by,

$$I_{\text{diff}} = \text{PEEC}_{\text{diff}} I_{\text{diffuse,incident}} (1 - \rho_c) \exp(-\text{PEEC}_{\text{diff}} \text{laic}), \quad (7)$$

where,  $I_{\text{diffuse,incident}}$  is the incident diffuse solar insolation,  $\rho_c$  is the plant canopy reflection coefficient defined as total reflection from crop canopy,

$$\rho_c = \frac{1 - \sqrt{1 - \sigma}}{1 + \sqrt{1 - \sigma}}, \quad (8)$$

laic is the leaf area index at a particular depth of the plant canopy is given by,

$$\text{laic} = x_{\text{gauss}} \text{LAI}, \quad (9)$$

where  $x_{\text{gauss}}$  denotes the presence of leaves at different depths of the plant canopy. Similarly, total absorption by leaves per unit leaf area per depth from direct sunlight,

$$I_{\text{direct,total}} = \text{PEEC}_{\text{direct}} I_{\text{direct,incident}} (1 - \rho_c) \exp(-\text{PEEC}_{\text{direct}} \text{laic}). \quad (10)$$

Equation (10) computes light absorbed by the plant canopy from incident direct solar radiation. This includes light captured by leaves through direct interception as well as light capture through scattering of light from direct interception. Leaves that directly intercept direct sunlight are per unit leaf area per canopy depth through is computed by the equation,

$$I_{\text{sunlit,direct}} = \text{PEEC}_{\text{bl}} I_{\text{direct,incident}} (1 - \sigma) \exp(-\text{PEEC}_{\text{bl}} \text{laic}), \quad (11)$$

Shaded leaves absorb light using both diffuse and scattered sunlight is given by,

$$I_{\text{total,diffuse}} = I_{\text{diff}} + (I_{\text{direct,total}} - I_{\text{sunlit,direct}}). \quad (12)$$

### 1.3. Photosynthesis

Gross rate of photosynthesis is computed by integrating the photosynthetic assimilation of leaves in a plant over the entire canopy. This does not account for CO<sub>2</sub> loss due to respiration. Maximum gross rate of photosynthesis is limited by either light, CO<sub>2</sub> or plant regeneration processes when exposed to both high light and high CO<sub>2</sub>. The maximum rate of CO<sub>2</sub> assimilation is limited by three different scenarios,

**A. Low light:** At sufficient CO<sub>2</sub>, with increasing light intensity plants experience a saturation in CO<sub>2</sub> assimilation. This is termed the light saturated maximum rate of photosynthesis ( $F_{mm}$ ). This parameter changes as a function of both spectra and temperature and is given by,<sup>1,6</sup>

$$F_{mm} = \left( -4.43 + (2.11 \text{temp}_{\text{plant}}) - (0.0438 \text{temp}_{\text{plant}}^2) \right) (\text{spectral-factor}), \quad (13)$$

where  $\text{temp}_{\text{plant}}$  denotes greenhouse plant temperature, spectral-factor denotes parameter impacting maximum rate of photosynthesis as a function of spectra.

**B. High light:** At high light, there is limitation by CO<sub>2</sub>. This is termed CO<sub>2</sub> saturated maximal rate of photosynthesis. The mathematical relation to determine CO<sub>2</sub> saturated rate of photosynthesis is given by,

$$F_{nc} = \frac{C_a - \tau}{r_m + (1.6r_s) + (1.4r_{bv})}, \quad (14)$$

where  $r_m$  is the mesophyll resistance,  $r_{bv}$  is the boundary layer resistance,  $r_s$  is the stomatal resistance,  $C_a$  denotes CO<sub>2</sub> concentration in ambient environment,  $\tau$  denotes CO<sub>2</sub> compensation point is given by,

$$\tau = \tau_{25} e^{0.07(T-25)}, \quad (15)$$

where  $\tau_{25}$  is the CO<sub>2</sub> compensation at 25<sup>0</sup>C.

**C. High light and high CO<sub>2</sub>:** At both high light and high CO<sub>2</sub> the rates of the regeneration processes involving other enzymes will become limiting.<sup>1</sup> The assimilation rate will then be particularly sensitive to temperature changes. In this case the maximum rate of photosynthesis is given by the minimum of either light induced- or CO<sub>2</sub> induced-saturation. The saturation photosynthesis rate is denoted by,

$$f_{\text{photmax}} = \min(F_{mm}, F_{nc}). \quad (16)$$

The photosynthetic assimilation of shaded and sunlit leaves at a particular depth is given by,

$$f_{\text{phot,inst}} = f_{\text{photmax}} Y, \quad (17)$$

where  $y$  is a dimensionless function of absorbed diffuse and direct sunlight by the plants is given by,

$$y = \frac{1+x-\sqrt{(1+x)^2-4x\theta}}{2\theta}, \quad (18)$$

$$\text{where } x = \frac{c_\epsilon I_{\text{abs,par}}}{F_{g,\text{max}}}, \quad (19)$$

where  $I_{\text{abs,par}}$  denotes sunlight in the PAR region absorbed by the plants. This equation is applicable to both direct, diffuse and scattered radiation,  $\epsilon$ ,  $c_\epsilon$  denotes the slope of the linear part of the photosynthesis-light curve is given by,

$$c_\epsilon = \frac{\epsilon(C_a - \tau)}{(C_a + 2\tau)}, \quad (20)$$

where  $C_a$  denotes greenhouse  $\text{CO}_2$  concentration,  $\tau$  denotes  $\text{CO}_2$  compensation point which is the point where the uptake of  $\text{CO}_2$  equals the respiratory release of  $\text{CO}_2$ .

At each considered depth in the plant canopy, the local assimilation rate is given by,

$$f_{\text{phot,local}} = \text{frac}_{\text{sun}} f_{\text{phot,inst,sun}} + (1 - \text{frac}_{\text{sun}}) f_{\text{phot,inst,shd}}, \quad (21)$$

where  $\text{frac}_{\text{sun}}$  is the fraction of sunlit leaf area is defined by,

$$\text{frac}_{\text{sun}} = e^{-\text{PEEC}_{\text{blaic}}}. \quad (22)$$

Finally, plant canopy gross photosynthetic assimilation rate is given by,

$$f_{\text{phot,gros}} = \text{LAI} \sum_{i=1}^5 w_{\text{gauss}}(i) \text{FGL}(i), \quad (23)$$

where  $w_{\text{gauss}}$  is the weight associated with assimilation rate at different canopy depths.

#### 1.4. Computing plant dry mass

The plant dry mass module describes the dynamic behavior of the two state variables – non-structural dry weight ( $X_{\text{nsdw}}$ ) and structural dry weight  $X_{\text{sdw}}$  on a square-meter soil basis.<sup>2</sup> Dry mass does not include water content in the plant.<sup>7</sup>

$$\frac{dX_{\text{nsdw}}}{dt} = c_\alpha f_{\text{phot}} \Phi_{\text{PSII}} - r_{\text{gr}} X_{\text{sdw}} - f_{\text{resp}} - \frac{1-c_\beta}{c_\beta} r_{\text{gr}} X_{\text{sdw}}, \quad (24)$$

$$\frac{dX_{\text{sdw}}}{dt} = r_{\text{gr}} X_{\text{sdw}}. \quad (25)$$

where  $X_{\text{nsdw}}$  and  $X_{\text{sdw}}$  are the dry weight of non-structural and structural material,  $c_\alpha$  is the factor converting  $\text{CO}_2$  assimilated into  $\text{CH}_2\text{O}$ ,  $c_\beta$  is the Respiratory and synthesis losses of non-structural material due to growth,  $f_{\text{phot}}$  is the rate of  $\text{CO}_2$  assimilation through photosynthesis,  $\Phi_{\text{PSII}}$  is the quantum yield of photosystem II (PSII),  $r_{\text{gr}}$  is the relative growth rate and  $f_{\text{resp}}$  is the maintenance

respiration loss. The relative growth rate of structural dry matter depends only on the rate at which non-structural material is transformed into structural material. It is assumed that the growth rate obeys the Michaelis Menten equation given by,<sup>2</sup>

$$r_{gr} = c_{gr,max} \frac{X_{nsdw}}{c_Y X_{sdw} + X_{nsdw}} c_{Q10,gr}^{(temp_{plant}-20)/20}, \quad (26)$$

where  $c_{gr,max}$  is the saturation growth rate at 20 °C,  $c_Y$  denotes parameter that determines the rate of  $r_{gr}$ .  $c_{Q10,gr}$  denotes Q10 factor for growth which has a value of 1.6. Q10 factor denotes the value by which the relative growth rate changes at different plant temperature. The maintenance respiration of the crop is given by,

$$f_{resp} = (c_{resp,sht}(1 - c_\tau)X_{sdw} + c_{resp,rt}c_\tau X_{sdw})c_{Q10,resp}^{(T-25)/10}, \quad (27)$$

where  $c_{resp,sht}$  is the maintenance respiration coefficient for the shoot at 25<sup>0</sup>C,  $c_{resp,rt}$  is the maintenance respiration coefficient for the root at 25<sup>0</sup>C,  $c_{Q10,resp}$  is the Q10 factor for maintenance respiration which has a value of 2.  $c_\tau$  denotes ratio of root dry weight as a function of total dry weight.

### 1.5. Integrating spectral impact and photoinhibition in lettuce growth model

Experimental results are utilized to relate changes in specific leaf area, maximum rate of photosynthesis and root to shoot ratio to change in spectra of incident sunlight in the PAR region. The spectral change is analyzed based on differences in % blue (400-500 nm) and red (600-700 nm): blue (400-500 nm) (R:B) ratio. Wang et al. observed that different R:B ratios significantly affected photosynthesis as a function of light intensity<sup>6</sup> as shown in **Figure S2(A)**. The value of light saturated photosynthesis increases with the increase in the amount of blue on the PAR spectra up to a R:B value of 1. The authors see a slight reduction in light saturated photosynthesis rate during the absence of the red part of the spectra.

While R:B ratio impacts photosynthesis, the % blue in the light spectra has been shown to impact biomass partitioning to root and shoot. Increase in % blue is shown to improve root development at the cost of biomass partitioning to the shoot<sup>8</sup> as shown in **Figure S2(B)**. Root to shoot ratio impact both respiration loss and in turn total plant dry mass. % blue also impacts the specific leaf area (SLA) which denotes the fraction of increase in leaf area as a ratio of increase in biomass. This is indicated by the work done by Cope et al.<sup>9</sup> SLA as a function of % blue is shown in **Figure S2(C)**. The curve indicates high leaf area expansion at low % blue content and reduces rapidly

before becoming constant at around 20 percent blue. The high SLA is attributed to shade avoidance responses at low % blue.

Lettuce being a low light requiring crop oftentimes adapts its leaf area based on available light intensity. The work done by Fu et al., indicates that a DLI of 20-30 moles m<sup>-2</sup> day<sup>-1</sup> is optimal for the growth of lettuce.<sup>10</sup> Work done by Ravishankar et al, indicates that lettuce grown under ST-OSC filters with a DLI of about 13 -17 moles m<sup>-2</sup> day<sup>-1</sup> has similar yield to that of a reference lettuce grown under almost twice the amount of light received under the filters.<sup>11</sup> This was because lettuce adapted to changes in light intensity by changing its leaf area expansion. At the same time, at extremely high and low light intensities, lettuce loses part of its efficiency to utilize light absorbed to drive photosynthesis defined by quantum yield of photosystem II ( $\Phi_{PSII}$ ).<sup>10</sup> The experimentally obtained results is utilized to model SLA for various light intensities and this is again shown **Figure S2(C)**.

## 2. Description of Tomato growth model

The tomato crop is divided into components of leaves, stem, fruit, and roots for the purpose of modelling. Leaves and stem are lumped together as vegetative tissue and total weight is maintained in the model. The structure of the model is based on the work done by Jones et al.<sup>12</sup> Photosynthesis and respiration rates are computed on an hourly basis and integrated to obtain daily increment and total and fruit dry mass. The model relates leaf area expansion, dry matter partitioning to fruit and vegetative tissue were developed for daily calculations of leaf area expansion, dry matter partitioning to fruit and vegetative tissue. Important aspects of the model are discussed here.

### 2.1. Node development (N)

Nodes are the points on a stem where the buds, leaves and branching twigs originate for a tomato plant.<sup>13</sup> The rate of node development was modeled as a maximum rate of node appearance rate per day multiplied by a function that reduces vegetative development under non-optimal temperatures on an hourly basis during each day. Rate of change of node development is given by,

$$\frac{dN}{dt} = N_m f_N(\text{temp}_{\text{plant}}), \quad (28)$$

where  $N_m$  is the maximum rate of node appearance (at optimal temperatures),  $f_N(\text{temp}_{\text{plant}})$  is the function to modify node development rate as a function of hourly temperature.



## 2.2. Leaf Area Index (LAI)

For tomatoes, the LAI is expressed as a function of node position on the plant. The impact of LAI due to temperature variation is accounted through the corresponding impact of temperature on node development is given by,

$$\frac{d(\text{LAI})}{dt} = \frac{d(\text{LAI})}{dN} \cdot \frac{dN}{dt}, \quad (29)$$

where LAI is related to N by the following equation,

$$\text{LAI} = \rho \left( \frac{\delta}{\beta} \right) \ln\{1 + e^{[\beta(N-N_b)]}\},$$

where  $\rho$  is the plant density,  $\delta$  is the maximum leaf area expansion per node,  $\beta$  is the normalization coefficient in the equation and  $N_b$  is a coefficient that projects the linear segment of LAI vs N to the horizontal axis,

By substituting the expression for  $\frac{d(\text{LAI})}{dN}$  and introducing equation (28) for  $\frac{dN}{dt}$ , we get two case scenarios for the rate of change of LAI in comparison to a maximum LAI parameter. Maximum LAI is the point beyond which there is no further increase in LAI. When LAI is less than maximum LAI, the rate of change of LAI is given by,

$$\frac{d(\text{LAI})}{dt} = \rho \delta \lambda(\text{temp}_{\text{plant}}) \frac{e^{[\beta(N-N_b)]}}{1+e^{[\beta(N-N_b)]}} \frac{dN}{dt}, \quad (30)$$

where  $\lambda(\text{temp}_{\text{plant}})$  is a temperature function that reduces the rate of leaf area expansion.

Beyond the maximum LAI point, it is assumed that the leaves will be pruned or senesced to maintain a constant maximum LAI thereafter.<sup>12</sup> Hence the rate of change of LAI becomes 0.

## 2.3. Fruit Dry Matter ( $W_F$ )

Fruit dry weight was included by introducing a coefficient for the fraction of above-ground biomass growth partitioned daily to fruit after its development begins. This is assumed to begin at a specified developmental time or node position on the plant when the first fruit on the plant is above 10 mm in diameter.<sup>12</sup> Fruit weight is calculated using the net aboveground biomass growth rate given by:

$$\text{GR}_{\text{net}} = E(P_g - R_m)[1 - f_R(N)], \quad (31)$$

Where E is the growth efficiency which is defined as the ratio of biomass to photosynthate available for growth,  $f_R(N)$  is the fraction of daily growth partitioned to roots,  $P_g$  is the daily integral of gross photosynthesis given by<sup>14</sup>,

$$P_g = \frac{D P_{g,max} \text{ temp-factor}}{PEEC_{tomato}} \frac{\log\left(\left(\left((1-m) P_{g,max}\right) + (Q_e PEEC_{tomato} DLI)\right)\right)}{\left(\left((1-m) P_{g,max}\right) + (Q_e PEEC_{tomato} DLI) e^{(-PEEC_{tomato} LAI)}\right)}, \quad (32)$$

where  $D$  is the conversion factor of  $CO_2$  from  $\mu\text{mol } CO_2 \text{ m}^{-2} \text{ s}^{-1}$  to  $\text{g } CO_2 \text{ m}^{-2} \text{ day}^{-1}$ ,  $P_{g,max}$  is the light saturated leaf  $CO_2$  assimilation rate, temp-factor is the factor accounting for the effect of ambient temperature on gross assimilation,  $PEEC_{tomato}$  is the plant effective extinction coefficient for tomato,  $m$  is the leaf light transmission coefficient,  $Q_e$  is the leaf quantum efficiency,  $DLI$  is the daily light integral in the photosynthetically active radiation region incident on plants.

$R_m$  denotes the daily integral of maintenance respiration<sup>15</sup> given by,

$$R_m = \int Q_{10}^{\frac{\text{temp}_{plant}-20}{10}} \cdot (r_m \cdot (W - W_F) + (r_f \cdot W_F)) \cdot dt, \quad (33)$$

where  $r_m$  and  $r_f$  are the respiration coefficients,  $(W - W_F)$  is the growing mass and  $W_F$  is the fruit mass.

Partitioning of aboveground growth to fruit each day beings at node position  $N_{FF}$  and increases asymptotically to a maximum partitioning using the following equation,

$$\frac{dW_F}{dt} = GR_{net} \cdot \alpha_F \cdot f_F \cdot [1 - e^{-v(N - N_{FF})}] \cdot g(\text{temp}_{daytime,plant}) \text{ if } N > N_{FF}, \quad (34)$$

where  $\alpha_F$  is the maximum partitioning of new growth to fruit,  $f_F$  is the parameter that modifies partitioning to fruits,  $v$  denotes the transition coefficient between vegetative and full fruit growth,  $g(\text{temp}_{daytime,plant})$  is the function that reduces growth due to high daytime temperature if it is higher than a critical temperature given by,

$$g(\text{temp}_{daytime,plant}) = 1 - 0.154 \cdot (\text{temp}_{daytime,plant} - \text{temp}_{crit}) \text{ if } \text{temp}_{daytime,plant} > \text{temp}_{crit}, \quad (35)$$

where  $\text{temp}_{daytime,plant}$  is the daily average temperature of the plant during day time,  $\text{temp}_{crit}$  is the defined critical temperature, 0.154 is the slope computed based on experiments.<sup>12</sup>

#### 2.4. Aboveground biomass accumulation (W)

Biomass accumulation is the result of photosynthesis, respiration and tissue conversion processes.

The aboveground biomass accumulation is given by,

$$\frac{dW}{dt} = GR_{net} - p_1 \cdot \rho \cdot \left(\frac{dN}{dt}\right), \quad (36)$$

where  $p_1$  is the dry matter of leaves removed per plant per node development after  $LAI_{max}$  is reached and a constant value thereafter. Under some conditions, the fruit dry matter growth may be very low due to high temperatures and there will be excess carbohydrate available. The tomato

model does not explicitly include sink strength calculations. Therefore, we assume that there is a maximum rate of vegetative growth per node and that the rate of change of biomass accumulation may be restricted by this limit if fruit growth is limited given by,

$$\left(\frac{dW}{dt}\right)_{\max} = \frac{dW_F}{dt} + (V_{\max} - p_1) \cdot \rho \frac{dN}{dt}. \quad (37)$$

Total above ground dry matter growth is the minimum of equation (36) and (37) and is given by,

$$\frac{dW}{dt} = \min\left(\frac{dW}{dt}, \left(\frac{dW}{dt}\right)_{\max}\right). \quad (38)$$

### 3. Description of Koppen-Geiger climate categories

Tropical climates are categorized by constant high temperatures and high relative humidity exceeding 75 %.<sup>16</sup> Based on annual precipitation received, these climates are further sub-categorized into rainforest, monsoon, and savanna climates. Arid climates are characterized by low annual precipitation and the various regions are classified into arid and semi-arid hot/cold conditions accordingly. Hot arid and semi-arid climates have an average annual temperature above 18 °C (64 °F). Cold arid and semi-arid climates have winter temperatures that fall below -3 °C (27 °F). Temperate climates have an average temperature above -3 °C (27 °F) in their coldest month but below 18 °C (64 °F) fall under the broad category of temperate climates. This climate is further divided into sub-categories based on amount of precipitation received and degree of summer heat into subtropics, mediterranean, highland, highland-oceanic and subpolar oceanic climates. Snow climates has an average temperature of above 10 °C (50 °F) in the warmest months and below -3 °C (27 °F) in the coldest month. Snow climates are sub-categorized into humid and mediterranean climates that range from hot summer to extremely cold subarctic climate. While some of the hot summer climates have temperature exceeding 22 °C (72 °F), the subarctic climates have winter temperatures as low as -38 °C (-36 °F). Finally, the polar climates are defined by the warmest temperature of any month not exceeding 10 °C (50 °F). This is subcategorized into tundra and icecap climates with the latter having no months in the year where temperature exceeds 0 °C (32 °F).

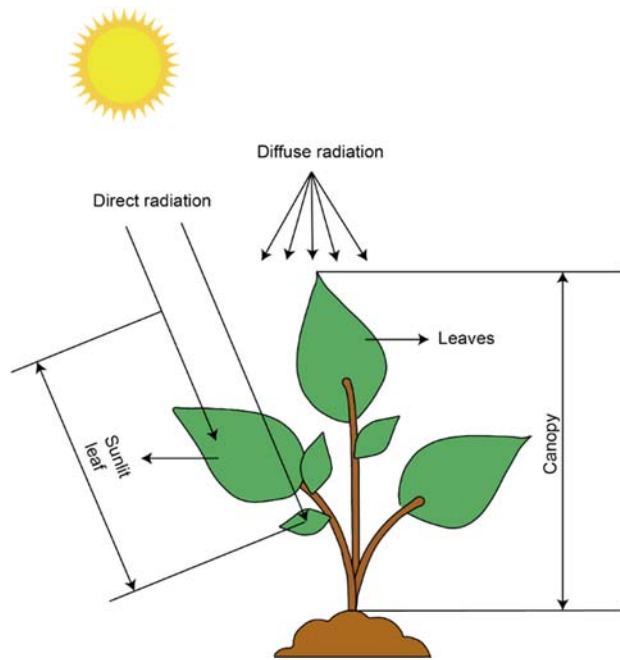

**Figure S1.** Depiction of absorption of direct and diffuse sunlight over plant canopy.

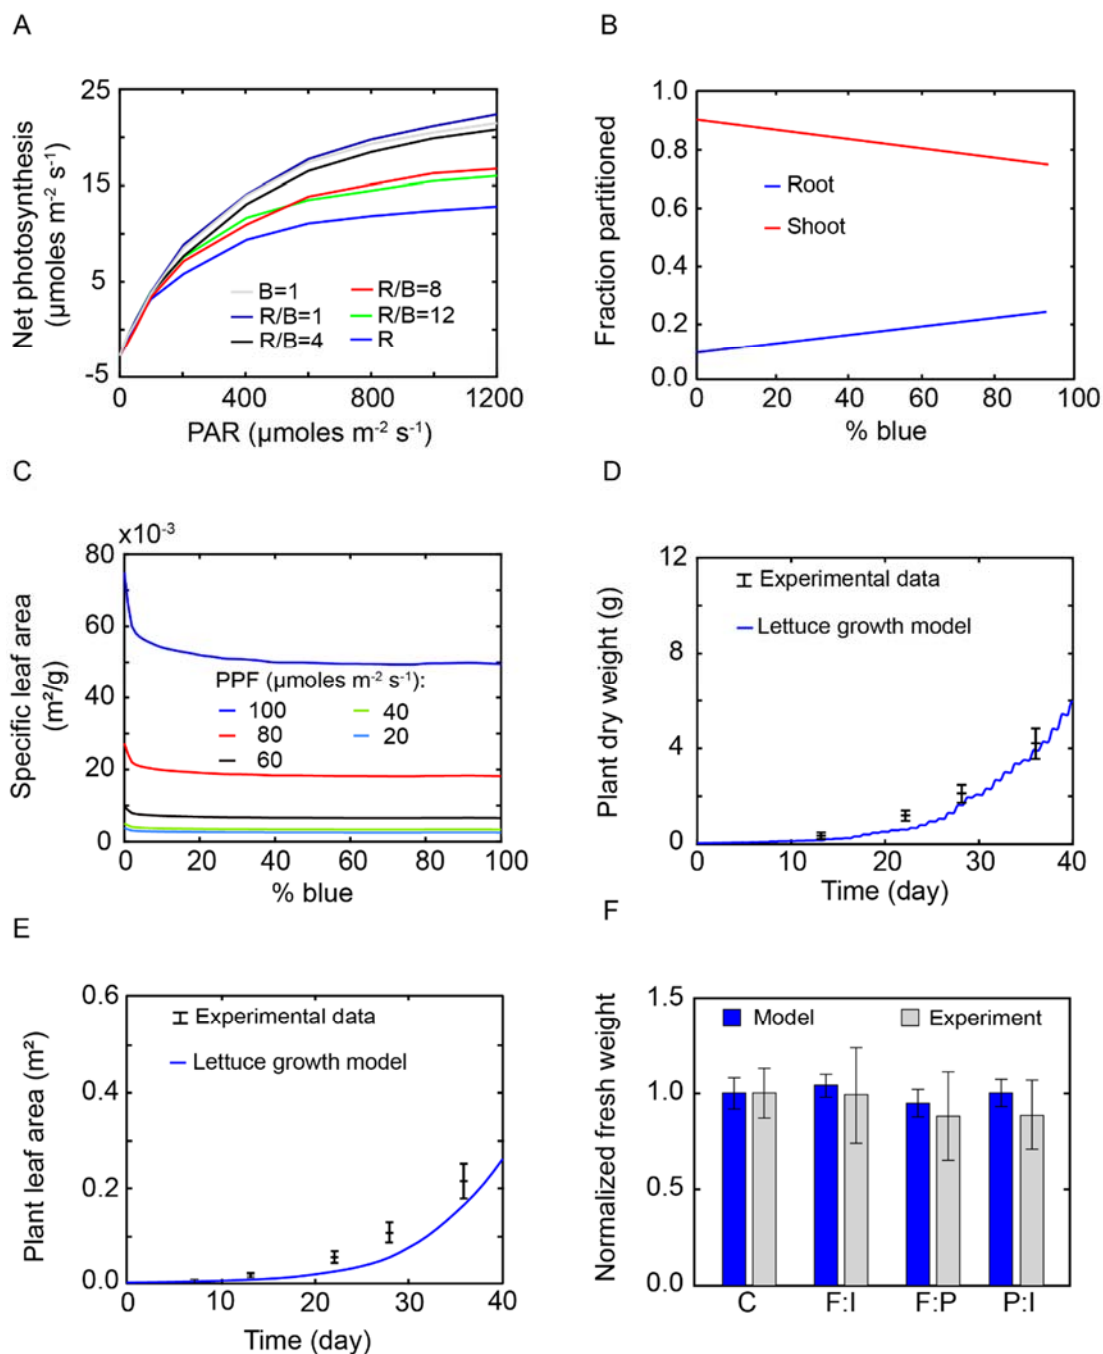

**Figure S2.** (A) Net photosynthesis as a function of R:B ratio and PAR light intensity.<sup>6</sup> (B) Fraction partitioned to root and shoot as a function of % blue.<sup>8</sup> (C) Change in specific leaf area for lettuce as a function of % blue.<sup>17,18</sup> Validation of (D) dry weight and (E) leaf area obtained from the lettuce growth model with corresponding experimental data in Henten et al.<sup>2</sup> (F) Validation of lettuce growth model with experimental lettuce growth<sup>11</sup> under a control (C) and three organic solar cell filters namely – FTAZ:IT-M (F:I), FTAZ:PCBM (F:P) and PTB7-Th:IEICO-4F (P:I).

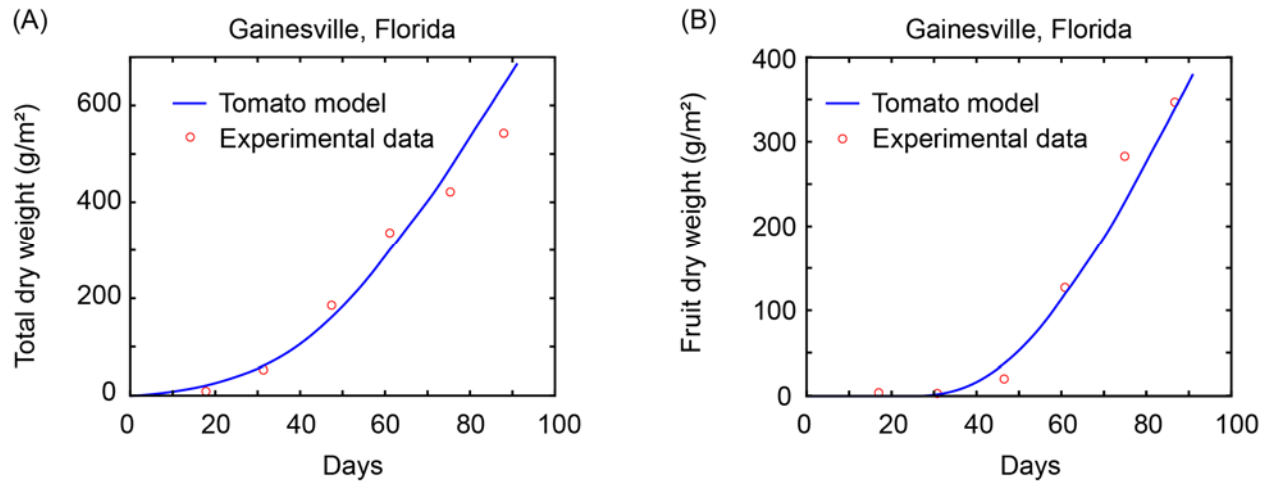

**Figure S3.** (A) Validation of tomato's dry weight and (B) mature fruit weight obtained from the tomato growth model with corresponding experimental data.

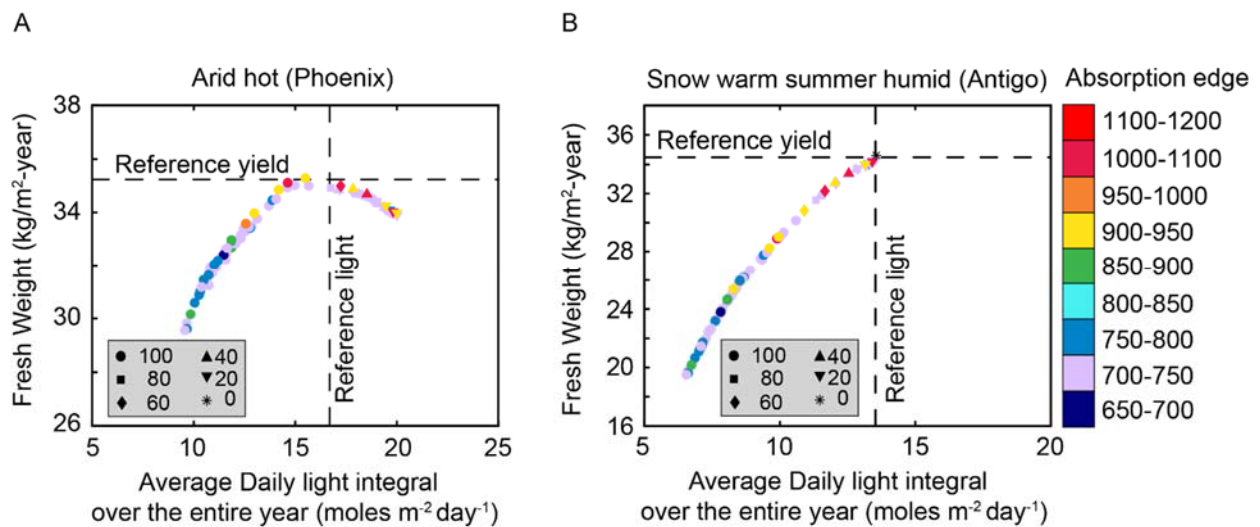

**Figure S4.** Fresh weight of lettuce as a function of average day light integral in (A) arid hot (Phoenix) and (B) Snow warm summer humid (Antigo). This is for the various solar cell systems and coverages considered relative to the conventional system.

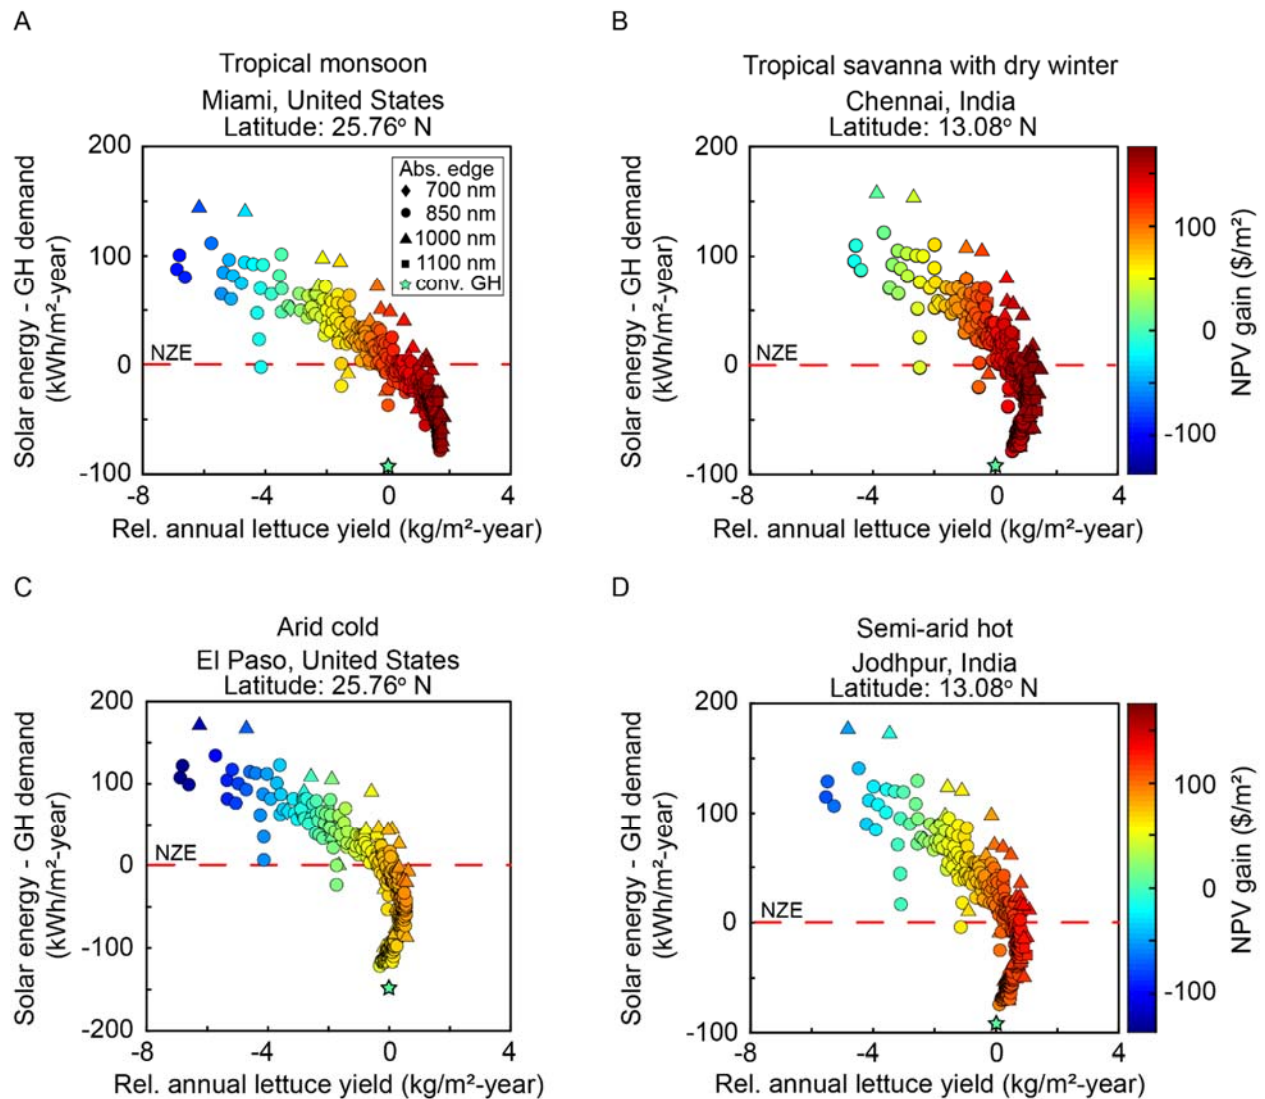

**Figure S5.** “Base case” NPV as a function of relative annual lettuce yield and difference between solar energy and greenhouse demand in (A) tropical monsoon (Miami), (B) tropical savanna – dry winter (Chennai), (C) dry cold arid (El paso) and (D) dry hot semi-arid (Jodhpur) climates. Lettuce yield and NPV gain is measured relative to the conventional greenhouse system for each climate. NPV gain is normalized to the greenhouse floor area.

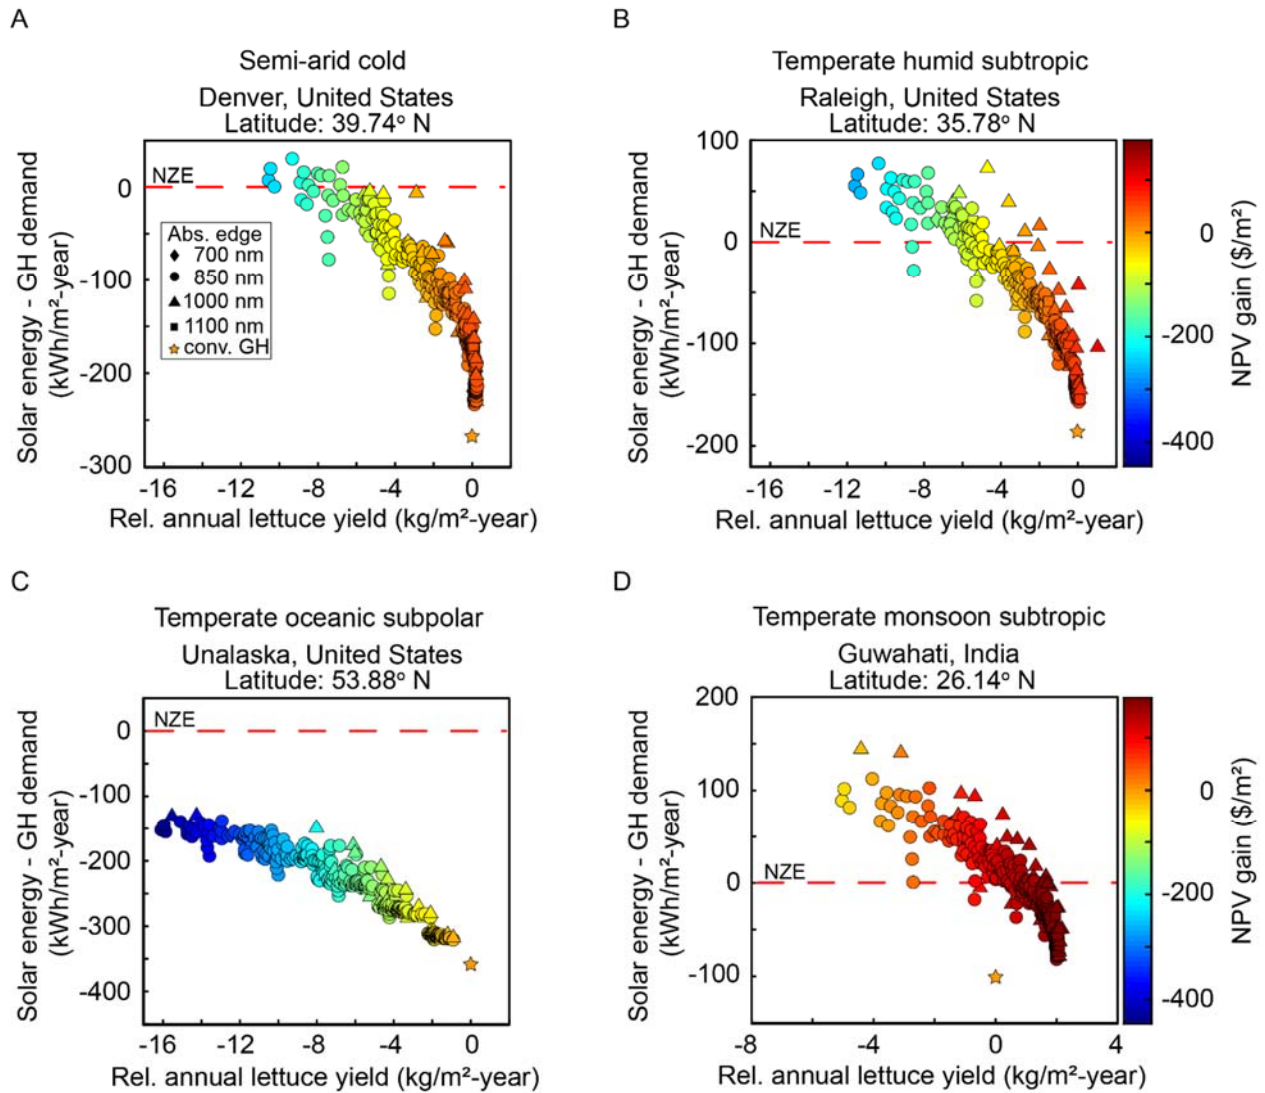

**Figure S6.** “Base case” NPV as a function of relative annual lettuce yield and difference between solar energy and greenhouse demand in (A) dry cold semi-arid (Denver), (B) temperate humid subtropical (Raleigh), (C) temperate subpolar oceanic (Unalaska) and (D) temperate monsoon humid subtropical (Guwahati) climates. Lettuce yield and NPV gain is measured relative to the conventional greenhouse system for each climate. NPV gain is normalized to the greenhouse floor area.



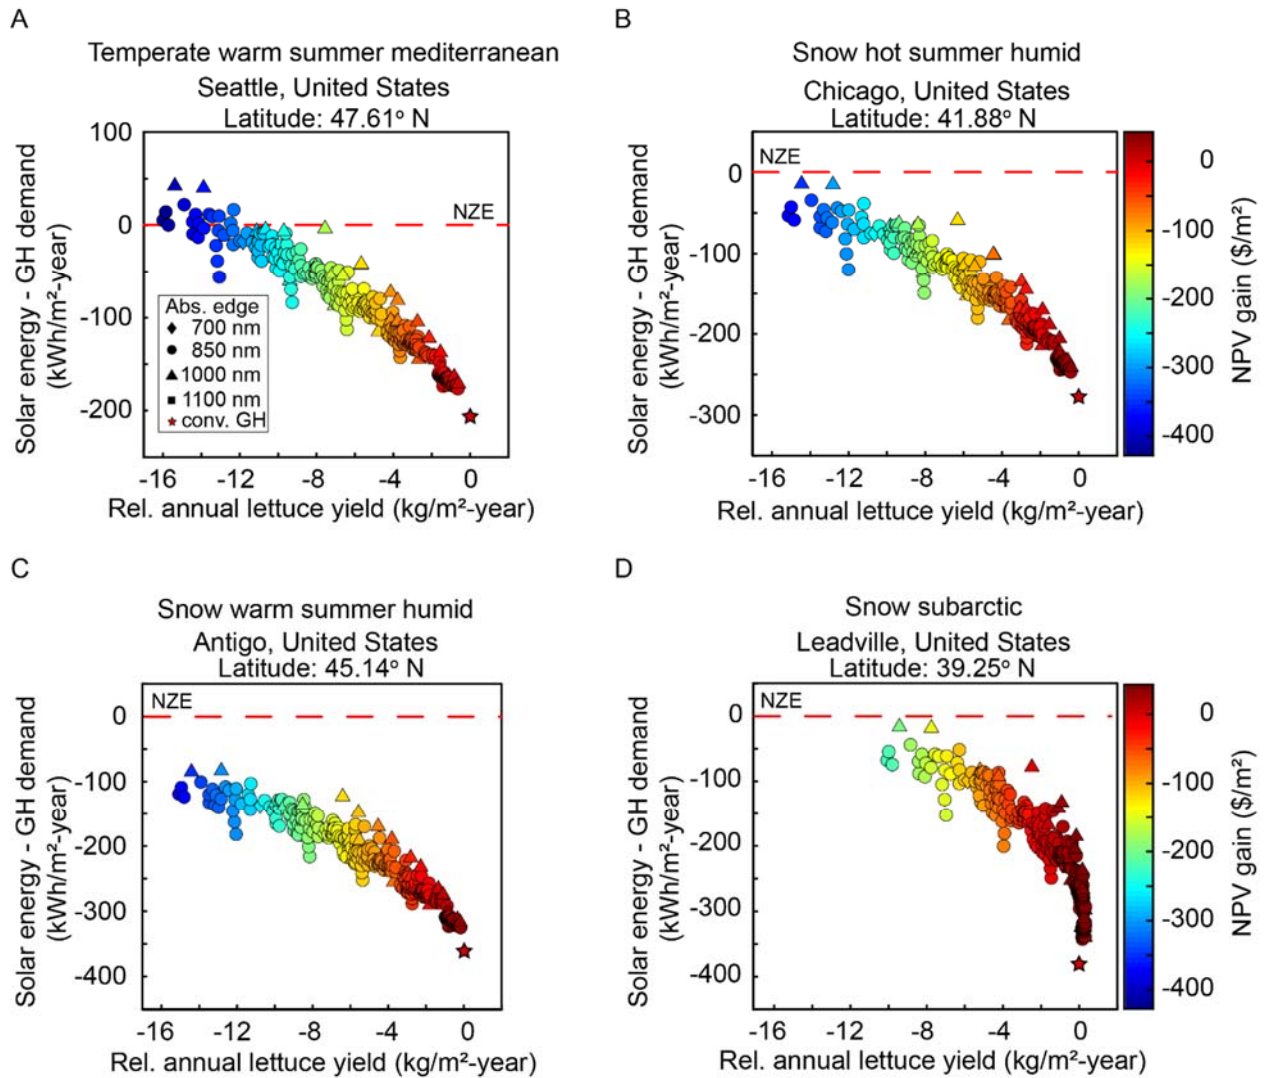

**Figure S7.** “Base case” NPV as a function of relative annual lettuce yield and difference between solar energy and greenhouse demand in (A) temperate warm summer mediterranean (Seattle), (B) snow hot summer humid (Chicago), (C) snow warm summer humid (Antigo) and (D) snow subarctic (Leadville) climates. Lettuce yield and NPV gain is measured relative to the conventional greenhouse system for each climate. NPV gain is normalized to the greenhouse floor area.

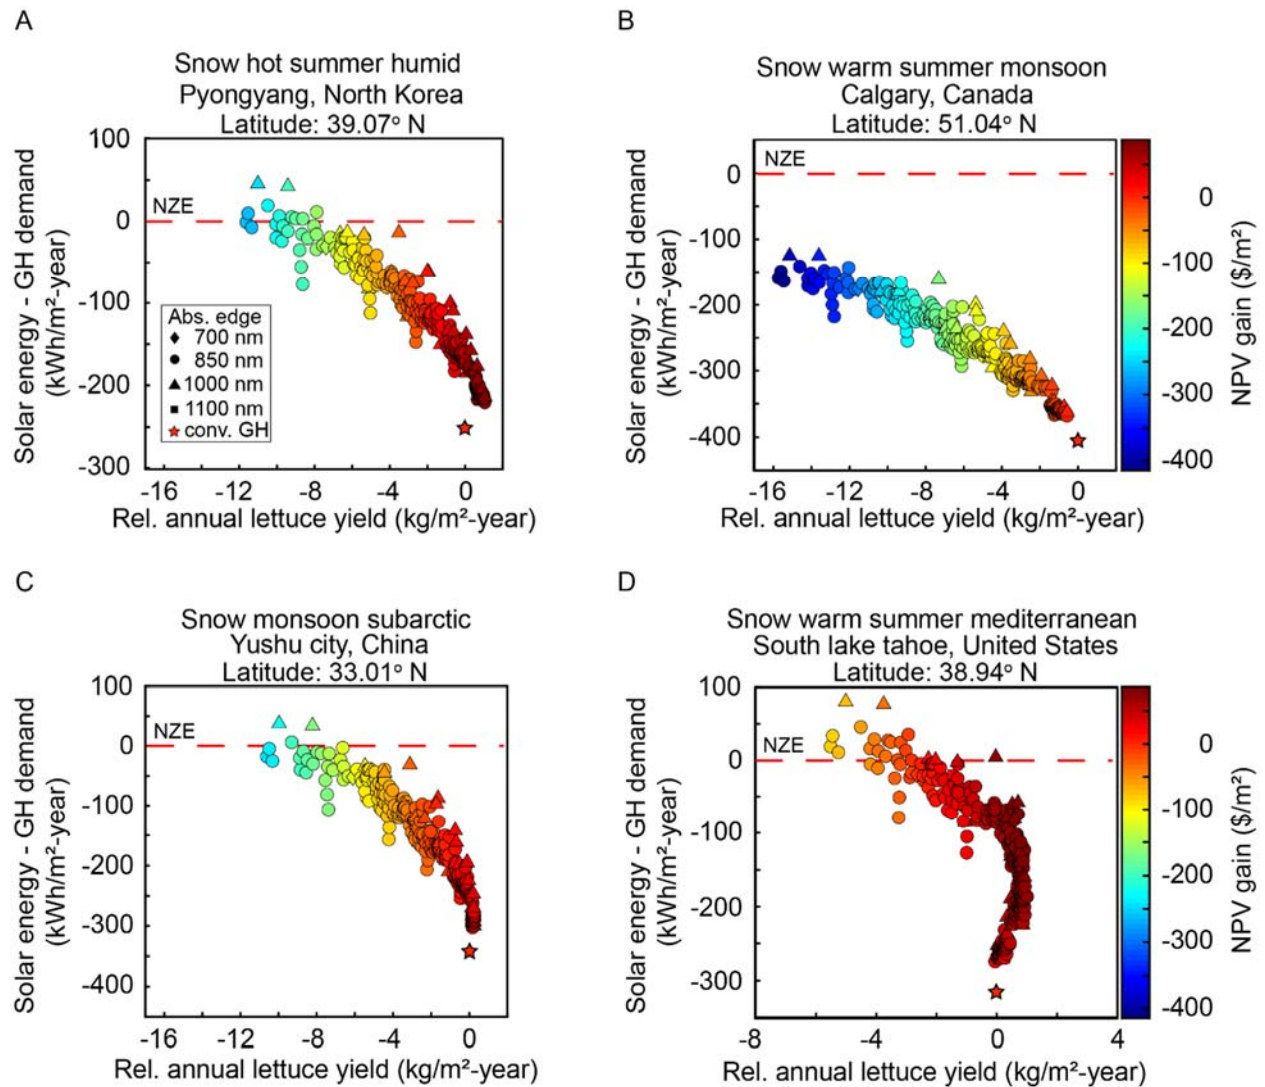

**Figure S8.** “Base case” NPV as a function of relative annual lettuce yield and difference between solar energy and greenhouse demand in (A) snow monsoon hot summer humid (Pyongyang), (B) snow monsoon warm summer humid (Calgary), (C) snow monsoon subarctic (Yushu City) and (D) snow warm summer humid mediterranean (South lake tahoe) climates. Lettuce yield and NPV gain is measured relative to the conventional greenhouse system for each climate. NPV gain is normalized to the greenhouse floor area.

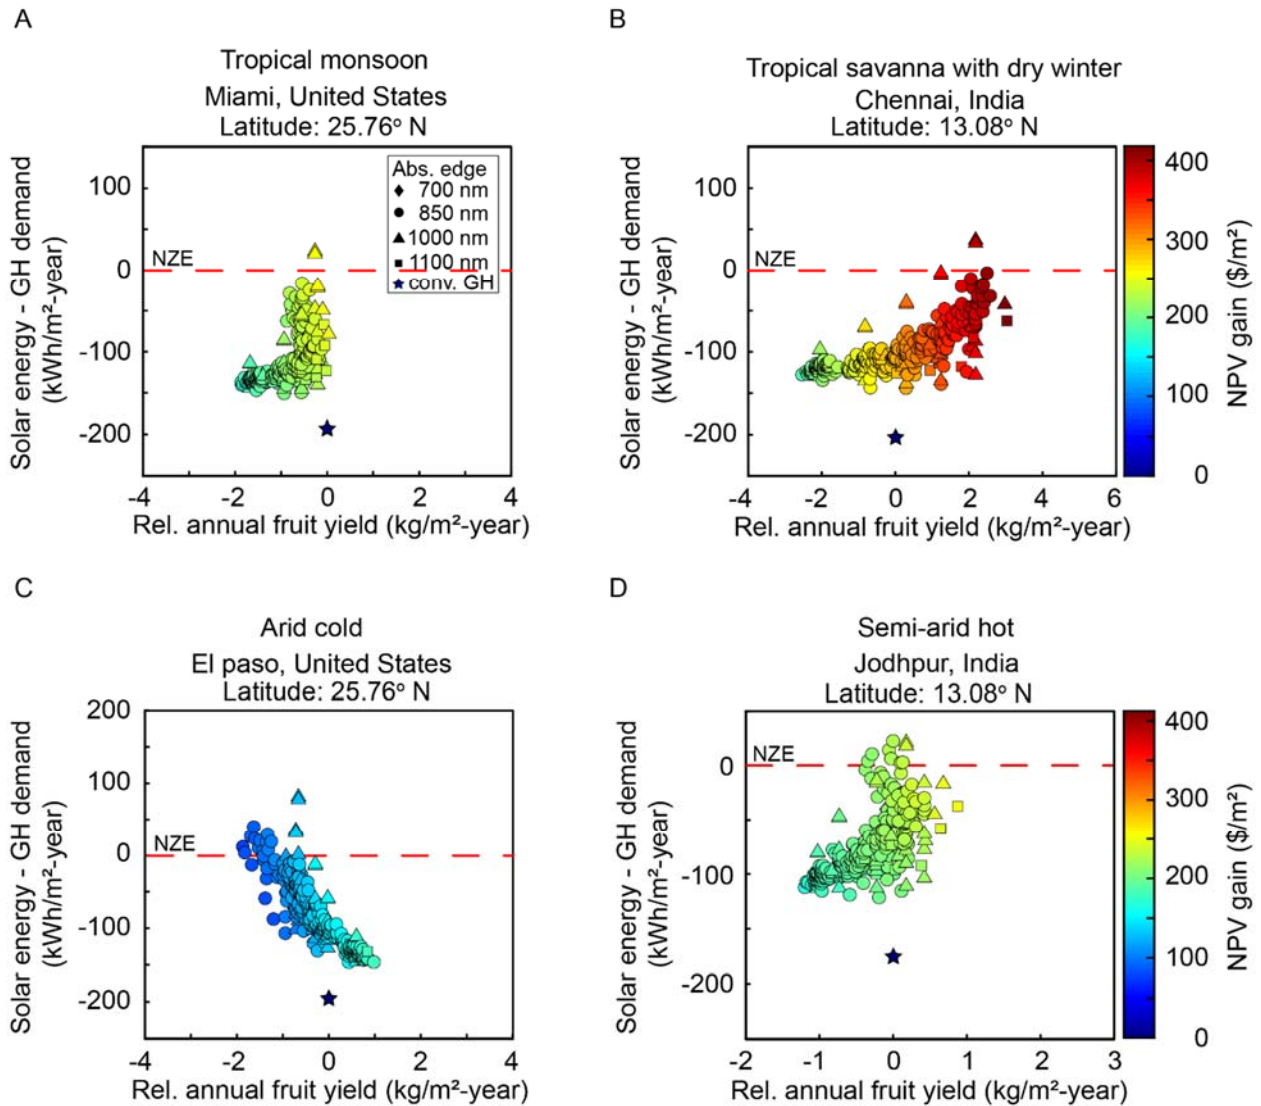

**Figure S9.** “Base case” NPV as a function of relative annual tomato fruit yield and difference between solar energy generated and greenhouse demand in (A) tropical monsoon (Miami), (B) tropical savanna – dry winter (Chennai), (C) dry cold arid (El Paso) and (D) dry hot semi-arid (Jodhpur) climates. Annual fruit yield and NPV gain is measured relative to the conventional greenhouse system for each climate. NPV gain is normalized to the greenhouse floor area.

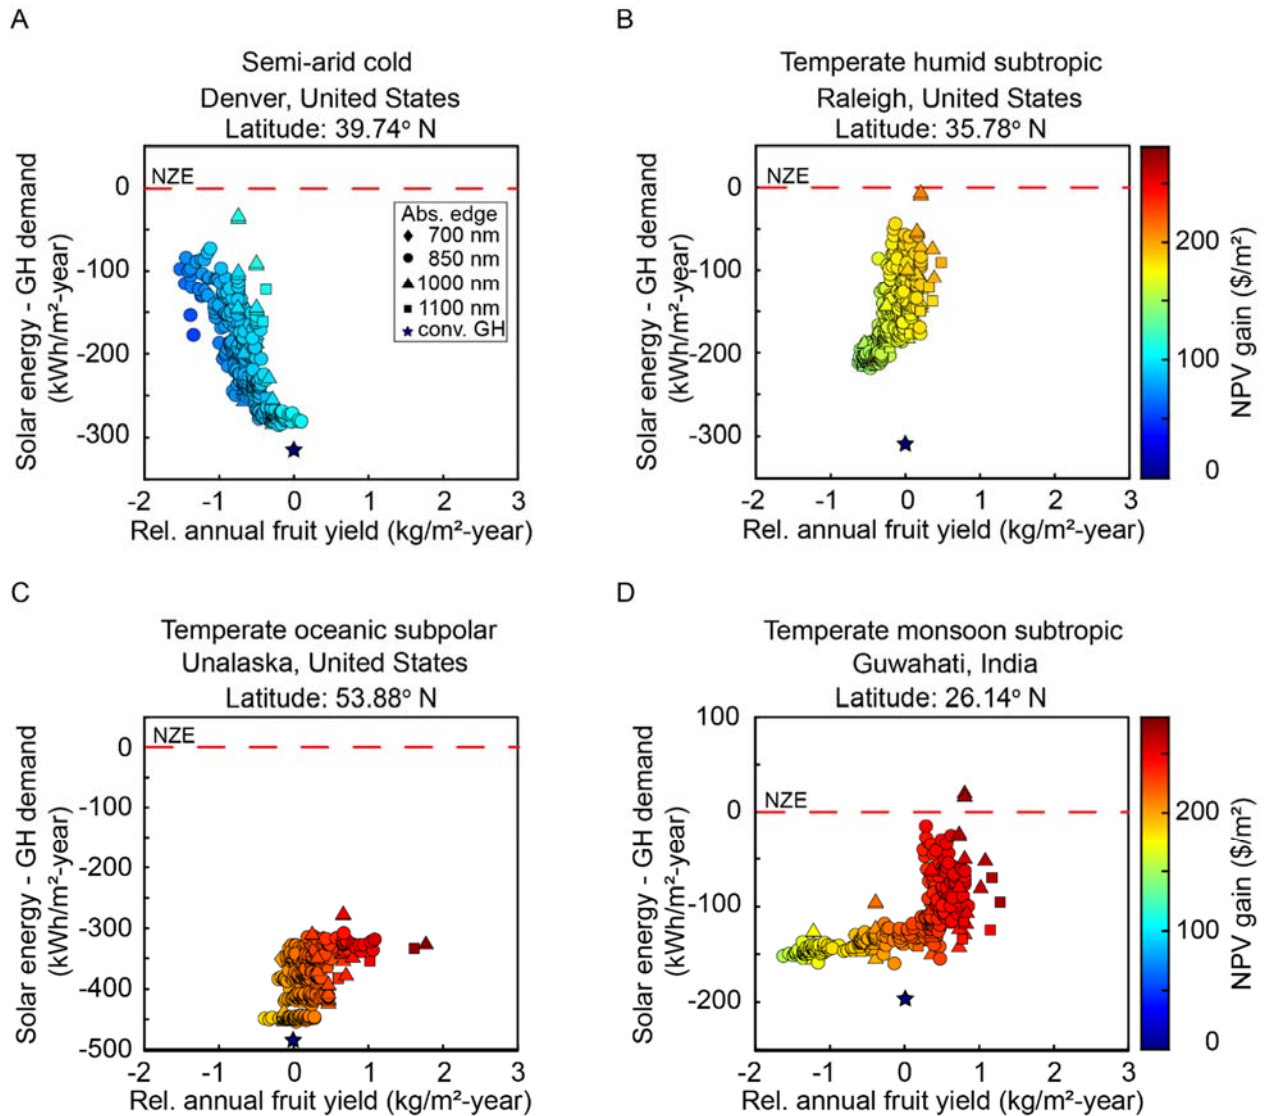

**Figure S10.** “Base case” NPV as a function of relative annual tomato fruit yield and difference between solar energy generated and greenhouse demand in (A) dry cold semi-arid (Denver), (B) temperate humid subtropical (Raleigh), (C) temperate subpolar oceanic (Unalaska) and (D) temperate monsoon humid subtropical (Guwahati) climates. Annual fruit yield and NPV gain is measured relative to the conventional greenhouse system for each climate. NPV gain is normalized to the greenhouse floor area.

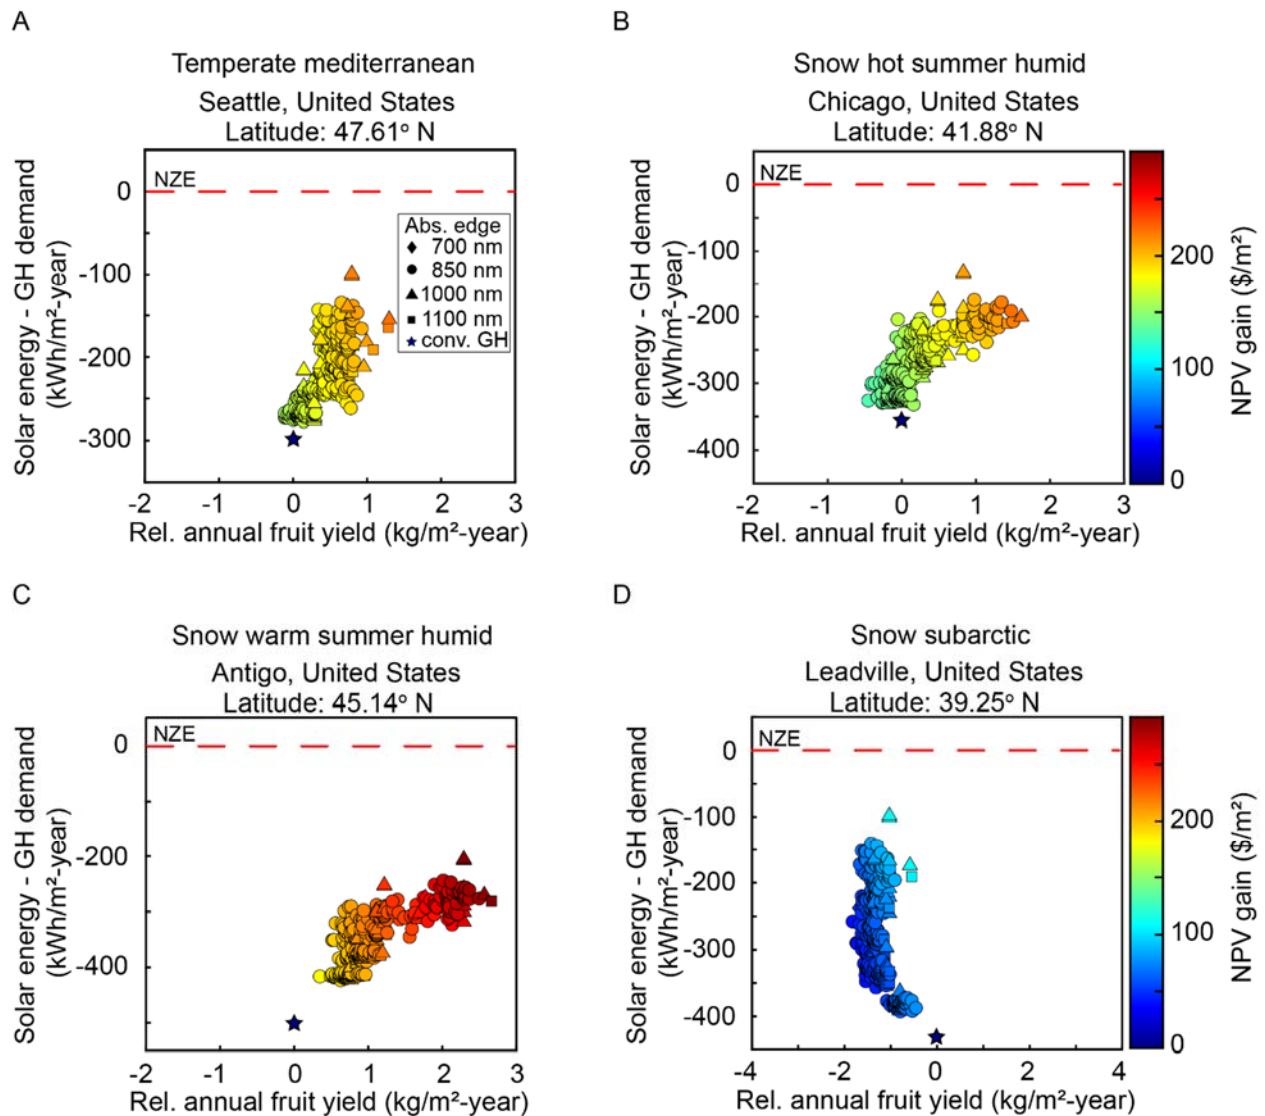

**Figure S11.** “Base case” NPV as a function of relative annual tomato fruit yield and difference between solar energy generated and greenhouse demand in (A) temperate warm summer mediterranean (Seattle), (B) snow hot summer humid (Chicago), (C) snow warm summer humid (Antigo) and (D) snow subarctic (Leadville) climates. Annual fruit yield and NPV gain is measured relative to the conventional greenhouse system for each climate. NPV gain is normalized to the greenhouse floor area.

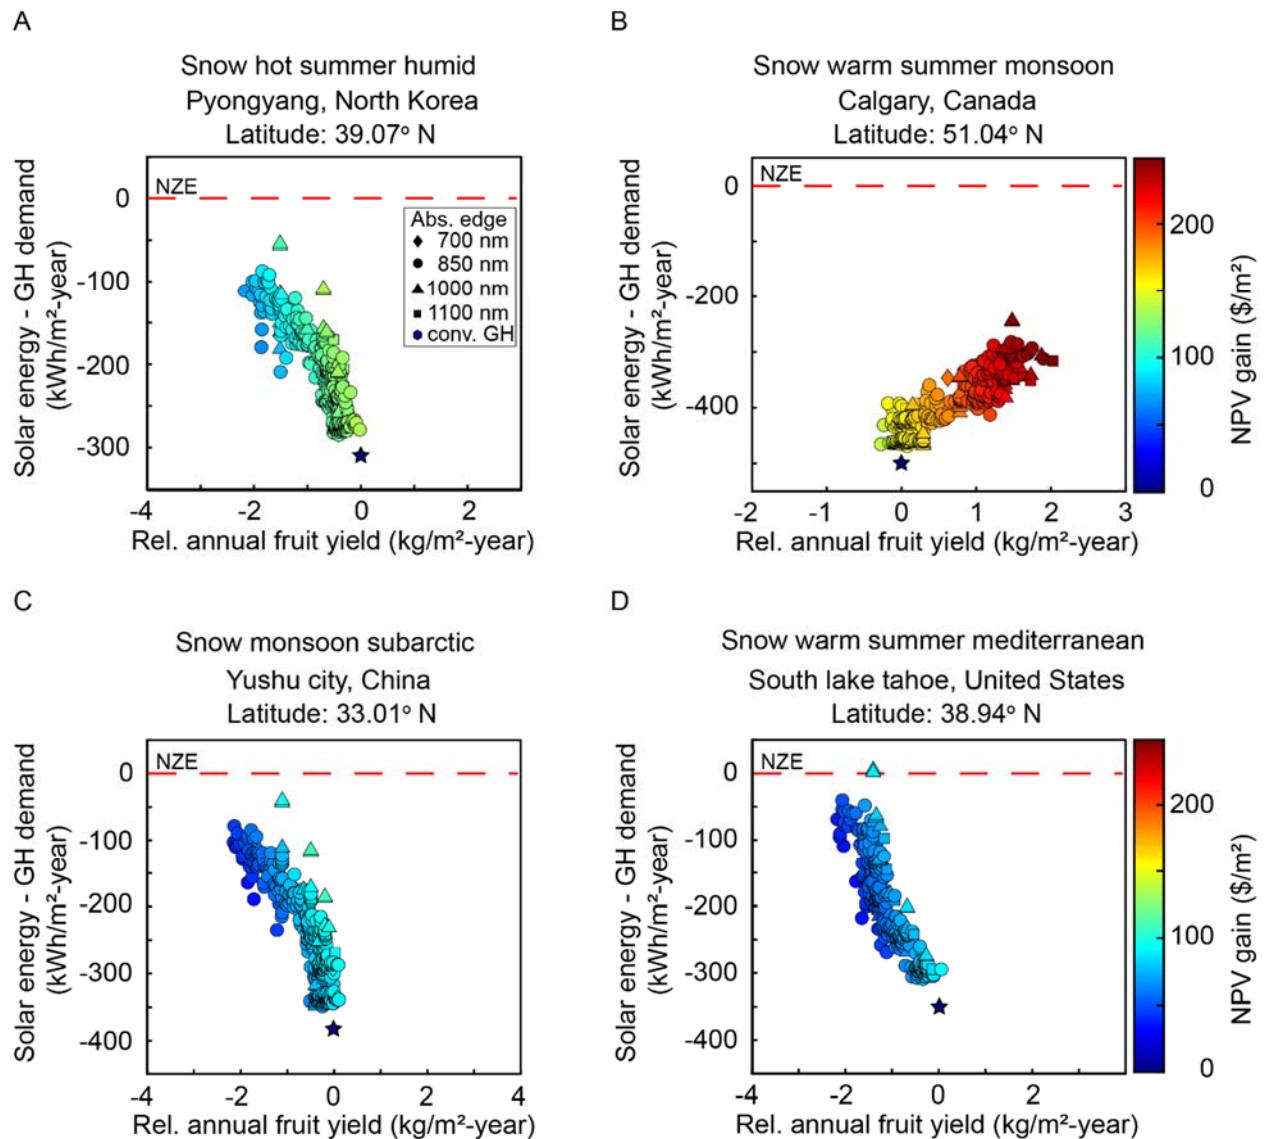

**Figure S12.** “Base case” NPV as a function of relative annual tomato fruit yield and difference between solar energy generated and greenhouse demand in (A) snow monsoon hot summer humid (Pyongyang), (B) snow monsoon warm summer humid (Calgary), (C) snow monsoon subarctic (Yushu city) and (D) snow warm summer humid mediterranean (South lake tahoe) climates. Annual fruit yield and NPV gain is measured relative to the conventional greenhouse system for each climate. NPV gain is normalized to the greenhouse floor area.

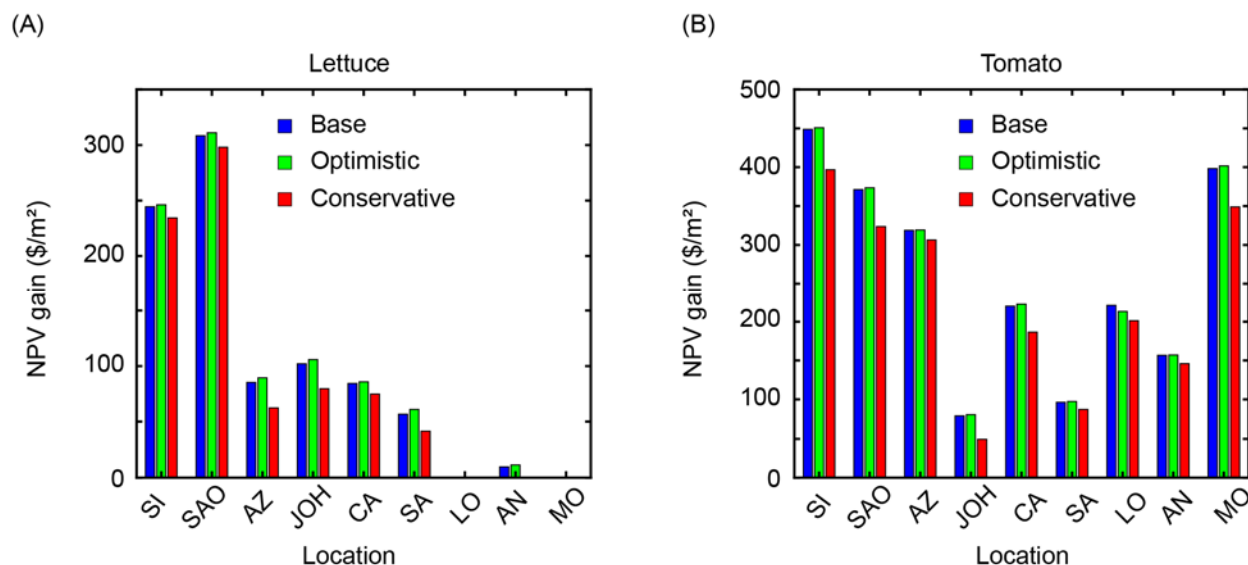

**Figure S13.** The relative gain in “base case”, “optimistic” and “conservative” NPV per unit greenhouse floor area with roof integrated OSCs for (A) lettuce and (B) tomato. The locations modelled are Singapore (SI), Sao Luis (SAO), Phoenix (AZ), Johannesburg (JOH), Sacramento (CA), Salt Lake City (SA), London (LO), Anchorage (AN) and Mount Washington (MO).

**TABLE S1. Day light integral of popular greenhouse plants.**

| Plants       | Recommended DLI range for normal plant growth (moles m <sup>-2</sup> day <sup>-1</sup> ) | Associated country for greenhouse production <sup>a</sup>          | Reference                               |
|--------------|------------------------------------------------------------------------------------------|--------------------------------------------------------------------|-----------------------------------------|
| Lettuce      | 13-17                                                                                    | China, Japan                                                       | Ravishankar et al (2021) <sup>11</sup>  |
| Tomato       | 12-30                                                                                    | China, Spain, South Korea, Turkey, Italy, Morocco, Poland, Hungary | Fisher and Runkle (2004) <sup>88</sup>  |
| Cucumber     | 12-30                                                                                    | China, Spain, South Korea, Turkey, Italy, France, France, Poland   | Fisher and Runkle (2004) <sup>88</sup>  |
| Sweet pepper | 12-30                                                                                    | China, South Korea                                                 | Fisher and Runkle (2004) <sup>88</sup>  |
| Zucchini     | 10-30                                                                                    | Italy                                                              | Rouphael and Colla (2004) <sup>89</sup> |
| Melon        | 12-30                                                                                    | South Korea, Turkey, Italy, Japan                                  | Murakami et al (2017) <sup>90</sup>     |
| Cabbage      | 10-15                                                                                    | China                                                              | Mizuno et al (2011) <sup>91</sup>       |

|               |       |                                       |                                        |
|---------------|-------|---------------------------------------|----------------------------------------|
| Asparagus     | 13-19 | China, Japan, Italy, France           | Cossu et al (2020) <sup>92</sup>       |
| Radish        | 10-15 | China, Italy                          | Fisher and Runkle (2004) <sup>88</sup> |
| Spinach       | 13-19 | China, Japan, Turkey                  | Fisher and Runkle (2004) <sup>88</sup> |
| Rocket        | 13-19 | Italy, Morocco, China                 | Fisher and Runkle (2004) <sup>88</sup> |
| Bok Choy      | 10-15 | China                                 | Mizuno et al (2011) <sup>91</sup>      |
| Strawberry    | 12-19 | Morocco                               | Fisher and Runkle (2004) <sup>88</sup> |
| Eggplant      | 12-30 | Turkey, Italy, Morocco, Poland        | Uzun (2007) <sup>93</sup>              |
| Bell peppers  | 12-30 | China, Spain, Italy, Morocco, Hungary | Fisher and Runkle (2004) <sup>88</sup> |
| Chilli pepper | 12-30 | China, South Korea, Poland, Hungary   | Fisher and Runkle (2004) <sup>88</sup> |

<sup>a</sup> Top ten countries with highest greenhouse area for food production are selected.

**TABLE S2. Input parameters used in the lettuce growth model simulation.**

| Parameter                                                     | Value                                           |                      |
|---------------------------------------------------------------|-------------------------------------------------|----------------------|
| $\sigma$                                                      | PAR (400-700 nm): 0.2,<br>IR (700-2000 nm): 0.8 |                      |
| $\tau_{25}$ ( $\mu\text{g CO}_2 \text{m}^{-2}\text{s}^{-1}$ ) | 40 at 25 °C                                     |                      |
| $c_\alpha$                                                    | 0.68                                            |                      |
| $c_\beta$                                                     | 0.8                                             |                      |
| $c_\tau$                                                      | 0.15                                            |                      |
| $c_\gamma$                                                    | 1                                               |                      |
| $\Phi_{\text{PSII}}$                                          | DLI ( $\text{moles m}^{-2} \text{hr}^{-1}$ )    | $\Phi_{\text{PSII}}$ |
|                                                               | 5                                               | 0.56                 |
|                                                               | 10                                              | 1.00                 |
|                                                               | 20                                              | 0.93                 |
|                                                               | 30                                              | 0.89                 |
|                                                               | 40                                              | 0.75                 |
| $c_{\text{gr,max}}$                                           | $5 \times 10^{-6}$                              |                      |
| $C_{\text{Q10},\tau}$                                         | 2                                               |                      |
| $c_{\text{Q10,gr}}$                                           | 1.6                                             |                      |



|                                                     |                                                                                                                   |
|-----------------------------------------------------|-------------------------------------------------------------------------------------------------------------------|
| $c_{Q10,resp}$                                      | 2                                                                                                                 |
| $c_{resp,rt}$ ( $s^{-1}$ )                          | $1.16 \times 10^{-7}$                                                                                             |
| $c_{resp,sht}$ ( $s^{-1}$ )                         | $3.47 \times 10^{-7}$                                                                                             |
| $g_{bnd}$                                           | 0.007                                                                                                             |
| $g_m$                                               | 0 at $temp_{plant} = 0$ °C<br>0.005 at $temp_{plant} = 25$ °C<br>0 for $temp_{plant} \geq 39$ °C                  |
| Planting density<br>(plants/m <sup>2</sup> -ground) | 18                                                                                                                |
| $r_{bv}$ ( $s\ m^{-1}$ )                            | 20                                                                                                                |
| $R_d$ ( $\mu g\ CO_2\ m^{-2}\ s^{-1}$ )             | 40                                                                                                                |
| $r_s$ ( $s\ m^{-1}$ )                               | 100                                                                                                               |
| spectral-factor                                     | R:B      spectral-factor<br>0      2.15<br>1      2.25<br>4      2.06<br>8      1.68<br>12     1.60<br>>12   1.29 |
| wgauss                                              | 0.12,0.24,0.28,0.24, 0.12                                                                                         |
| xgauss                                              | 0.047,0.231,0.5,0.769, 0.953                                                                                      |
| $X_{sdw,initial}$ (g/m <sup>2</sup> )               | 2.025                                                                                                             |
| $X_{nsdw,initial}$ (g/m <sup>2</sup> )              | 0.675                                                                                                             |

**TABLE S3. Input parameters used in the tomato growth model simulation.**

| Parameter                                           | Value |
|-----------------------------------------------------|-------|
| $\alpha_F$ (day <sup>-1</sup> )                     | 0.80  |
| $\rho$ (plants m <sup>-2</sup> -ground)             | 4     |
| $\delta$ (m <sup>2</sup> -leaf node <sup>-1</sup> ) | 0.04  |
| $\beta$ (node <sup>-1</sup> )                       | 0.17  |
| $v$ (node <sup>-1</sup> )                           | 0.14  |

| $\lambda(\text{temp}_{\text{plant}})$                                         | <table border="1"> <thead> <tr> <th><math>\text{temp}_{\text{plant}}</math><br/>(°C)</th> <th><math>\lambda(\text{temp}_{\text{plant}})</math></th> </tr> </thead> <tbody> <tr><td>0</td><td>0.00</td></tr> <tr><td>9</td><td>0.00</td></tr> <tr><td>12</td><td>0.55</td></tr> <tr><td>28</td><td>1.00</td></tr> <tr><td>50</td><td>0.00</td></tr> </tbody> </table> | $\text{temp}_{\text{plant}}$<br>(°C) | $\lambda(\text{temp}_{\text{plant}})$   | 0 | 0.00 | 9  | 0.00 | 12 | 0.55 | 28 | 1.00 | 50 | 0.00 |    |      |
|-------------------------------------------------------------------------------|----------------------------------------------------------------------------------------------------------------------------------------------------------------------------------------------------------------------------------------------------------------------------------------------------------------------------------------------------------------------|--------------------------------------|-----------------------------------------|---|------|----|------|----|------|----|------|----|------|----|------|
| $\text{temp}_{\text{plant}}$<br>(°C)                                          | $\lambda(\text{temp}_{\text{plant}})$                                                                                                                                                                                                                                                                                                                                |                                      |                                         |   |      |    |      |    |      |    |      |    |      |    |      |
| 0                                                                             | 0.00                                                                                                                                                                                                                                                                                                                                                                 |                                      |                                         |   |      |    |      |    |      |    |      |    |      |    |      |
| 9                                                                             | 0.00                                                                                                                                                                                                                                                                                                                                                                 |                                      |                                         |   |      |    |      |    |      |    |      |    |      |    |      |
| 12                                                                            | 0.55                                                                                                                                                                                                                                                                                                                                                                 |                                      |                                         |   |      |    |      |    |      |    |      |    |      |    |      |
| 28                                                                            | 1.00                                                                                                                                                                                                                                                                                                                                                                 |                                      |                                         |   |      |    |      |    |      |    |      |    |      |    |      |
| 50                                                                            | 0.00                                                                                                                                                                                                                                                                                                                                                                 |                                      |                                         |   |      |    |      |    |      |    |      |    |      |    |      |
| CO <sub>2</sub> (ppm)                                                         | 450                                                                                                                                                                                                                                                                                                                                                                  |                                      |                                         |   |      |    |      |    |      |    |      |    |      |    |      |
| D                                                                             | 2.60                                                                                                                                                                                                                                                                                                                                                                 |                                      |                                         |   |      |    |      |    |      |    |      |    |      |    |      |
| E (g-d.w. g <sup>-1</sup> (CH <sub>2</sub> O))                                | 0.70                                                                                                                                                                                                                                                                                                                                                                 |                                      |                                         |   |      |    |      |    |      |    |      |    |      |    |      |
| f <sub>F</sub>                                                                | 0.95                                                                                                                                                                                                                                                                                                                                                                 |                                      |                                         |   |      |    |      |    |      |    |      |    |      |    |      |
| f <sub>R</sub> (N)                                                            | <table border="1"> <thead> <tr> <th>Node number</th> <th>f<sub>R</sub>(N)</th> </tr> </thead> <tbody> <tr><td>1</td><td>0.20</td></tr> <tr><td>12</td><td>0.15</td></tr> <tr><td>21</td><td>0.10</td></tr> <tr><td>30</td><td>0.07</td></tr> <tr><td>50</td><td>0.07</td></tr> <tr><td>90</td><td>0.07</td></tr> </tbody> </table>                                   | Node number                          | f <sub>R</sub> (N)                      | 1 | 0.20 | 12 | 0.15 | 21 | 0.10 | 30 | 0.07 | 50 | 0.07 | 90 | 0.07 |
| Node number                                                                   | f <sub>R</sub> (N)                                                                                                                                                                                                                                                                                                                                                   |                                      |                                         |   |      |    |      |    |      |    |      |    |      |    |      |
| 1                                                                             | 0.20                                                                                                                                                                                                                                                                                                                                                                 |                                      |                                         |   |      |    |      |    |      |    |      |    |      |    |      |
| 12                                                                            | 0.15                                                                                                                                                                                                                                                                                                                                                                 |                                      |                                         |   |      |    |      |    |      |    |      |    |      |    |      |
| 21                                                                            | 0.10                                                                                                                                                                                                                                                                                                                                                                 |                                      |                                         |   |      |    |      |    |      |    |      |    |      |    |      |
| 30                                                                            | 0.07                                                                                                                                                                                                                                                                                                                                                                 |                                      |                                         |   |      |    |      |    |      |    |      |    |      |    |      |
| 50                                                                            | 0.07                                                                                                                                                                                                                                                                                                                                                                 |                                      |                                         |   |      |    |      |    |      |    |      |    |      |    |      |
| 90                                                                            | 0.07                                                                                                                                                                                                                                                                                                                                                                 |                                      |                                         |   |      |    |      |    |      |    |      |    |      |    |      |
| f <sub>N</sub> (temp <sub>plant</sub> )                                       | <table border="1"> <thead> <tr> <th>temp<sub>plant</sub></th> <th>f<sub>N</sub>(temp<sub>plant</sub>)</th> </tr> </thead> <tbody> <tr><td>0</td><td>0.00</td></tr> <tr><td>9</td><td>0.00</td></tr> <tr><td>12</td><td>0.55</td></tr> <tr><td>28</td><td>1.00</td></tr> <tr><td>50</td><td>0.00</td></tr> </tbody> </table>                                          | temp <sub>plant</sub>                | f <sub>N</sub> (temp <sub>plant</sub> ) | 0 | 0.00 | 9  | 0.00 | 12 | 0.55 | 28 | 1.00 | 50 | 0.00 |    |      |
| temp <sub>plant</sub>                                                         | f <sub>N</sub> (temp <sub>plant</sub> )                                                                                                                                                                                                                                                                                                                              |                                      |                                         |   |      |    |      |    |      |    |      |    |      |    |      |
| 0                                                                             | 0.00                                                                                                                                                                                                                                                                                                                                                                 |                                      |                                         |   |      |    |      |    |      |    |      |    |      |    |      |
| 9                                                                             | 0.00                                                                                                                                                                                                                                                                                                                                                                 |                                      |                                         |   |      |    |      |    |      |    |      |    |      |    |      |
| 12                                                                            | 0.55                                                                                                                                                                                                                                                                                                                                                                 |                                      |                                         |   |      |    |      |    |      |    |      |    |      |    |      |
| 28                                                                            | 1.00                                                                                                                                                                                                                                                                                                                                                                 |                                      |                                         |   |      |    |      |    |      |    |      |    |      |    |      |
| 50                                                                            | 0.00                                                                                                                                                                                                                                                                                                                                                                 |                                      |                                         |   |      |    |      |    |      |    |      |    |      |    |      |
| PEEC <sub>tomato</sub>                                                        | 0.58                                                                                                                                                                                                                                                                                                                                                                 |                                      |                                         |   |      |    |      |    |      |    |      |    |      |    |      |
| LAI <sub>max</sub>                                                            | 5                                                                                                                                                                                                                                                                                                                                                                    |                                      |                                         |   |      |    |      |    |      |    |      |    |      |    |      |
| m                                                                             | 0.10                                                                                                                                                                                                                                                                                                                                                                 |                                      |                                         |   |      |    |      |    |      |    |      |    |      |    |      |
| N <sub>b</sub>                                                                | 16                                                                                                                                                                                                                                                                                                                                                                   |                                      |                                         |   |      |    |      |    |      |    |      |    |      |    |      |
| N <sub>FF</sub>                                                               | 22                                                                                                                                                                                                                                                                                                                                                                   |                                      |                                         |   |      |    |      |    |      |    |      |    |      |    |      |
| N <sub>m</sub>                                                                | 0.50                                                                                                                                                                                                                                                                                                                                                                 |                                      |                                         |   |      |    |      |    |      |    |      |    |      |    |      |
| p <sub>l</sub> (g-leaf d <sup>-1</sup> )                                      | 2                                                                                                                                                                                                                                                                                                                                                                    |                                      |                                         |   |      |    |      |    |      |    |      |    |      |    |      |
| P <sub>g,max</sub> (μmol CO <sub>2</sub> m <sup>-2</sup> s <sup>-1</sup> )    | 31                                                                                                                                                                                                                                                                                                                                                                   |                                      |                                         |   |      |    |      |    |      |    |      |    |      |    |      |
| Q <sub>e</sub> (μmol CO <sub>2</sub> μmol <sup>-1</sup> photons)              | 0.07                                                                                                                                                                                                                                                                                                                                                                 |                                      |                                         |   |      |    |      |    |      |    |      |    |      |    |      |
| Q <sub>10</sub>                                                               | 1.40                                                                                                                                                                                                                                                                                                                                                                 |                                      |                                         |   |      |    |      |    |      |    |      |    |      |    |      |
| r <sub>f</sub> (g-CH <sub>2</sub> O m <sup>-2</sup> -ground d <sup>-1</sup> ) | 0.01                                                                                                                                                                                                                                                                                                                                                                 |                                      |                                         |   |      |    |      |    |      |    |      |    |      |    |      |
| r <sub>m</sub> (g-CH <sub>2</sub> O m <sup>-2</sup> -ground d <sup>-1</sup> ) | 0.02                                                                                                                                                                                                                                                                                                                                                                 |                                      |                                         |   |      |    |      |    |      |    |      |    |      |    |      |
| temp-factor                                                                   | <table border="1"> <thead> <tr> <th>temp<sub>plant</sub></th> <th>temp-factor</th> </tr> </thead> <tbody> <tr><td>0</td><td>0.00</td></tr> <tr><td>9</td><td>0.70</td></tr> <tr><td>12</td><td>1.00</td></tr> <tr><td>15</td><td>1.00</td></tr> <tr><td>21</td><td>1.00</td></tr> </tbody> </table>                                                                  | temp <sub>plant</sub>                | temp-factor                             | 0 | 0.00 | 9  | 0.70 | 12 | 1.00 | 15 | 1.00 | 21 | 1.00 |    |      |
| temp <sub>plant</sub>                                                         | temp-factor                                                                                                                                                                                                                                                                                                                                                          |                                      |                                         |   |      |    |      |    |      |    |      |    |      |    |      |
| 0                                                                             | 0.00                                                                                                                                                                                                                                                                                                                                                                 |                                      |                                         |   |      |    |      |    |      |    |      |    |      |    |      |
| 9                                                                             | 0.70                                                                                                                                                                                                                                                                                                                                                                 |                                      |                                         |   |      |    |      |    |      |    |      |    |      |    |      |
| 12                                                                            | 1.00                                                                                                                                                                                                                                                                                                                                                                 |                                      |                                         |   |      |    |      |    |      |    |      |    |      |    |      |
| 15                                                                            | 1.00                                                                                                                                                                                                                                                                                                                                                                 |                                      |                                         |   |      |    |      |    |      |    |      |    |      |    |      |
| 21                                                                            | 1.00                                                                                                                                                                                                                                                                                                                                                                 |                                      |                                         |   |      |    |      |    |      |    |      |    |      |    |      |

|                                               |       |      |
|-----------------------------------------------|-------|------|
|                                               | 28    | 1.00 |
|                                               | 35    | 0.00 |
|                                               | 50    | 0.00 |
| temp <sub>crit</sub> (°C)                     | 24.40 |      |
| V <sub>max</sub> (g-d.w. node <sup>-1</sup> ) | 8     |      |

**TABLE S4. Donor-Acceptor blends utilized for ST-OSC stack simulation.**

| Donor:Acceptor <sup>a</sup> | Blend absorption edge <sup>b</sup> (nm) | ST-OSC device PCE (%) | Reference device PCE (%) | ST-OSC – PAR transmittance | Reference                        |
|-----------------------------|-----------------------------------------|-----------------------|--------------------------|----------------------------|----------------------------------|
| PBDB-T:CPDT-4F              | 910                                     | 7.56                  | 9.47                     | 0.39                       | Wang et al (2019) <sup>19</sup>  |
| PBDB-T:CPDT-4Cl             | 910                                     | 7.15                  | 9.28                     | 0.39                       | Wang et al (2019) <sup>19</sup>  |
| D18:Y6                      | 910                                     | 14.96                 | 18.22                    | 0.24                       | Liu et al (2020) <sup>20</sup>   |
| PBDB-T:ITIC                 | 750                                     | 10.17                 | 11.50                    | 0.26                       | Upama et al (2017) <sup>21</sup> |
| J60:ITIC                    | 750                                     | 6.36                  | 8.97                     | 0.36                       | Bin et al (2016) <sup>22</sup>   |
| J61:ITIC                    | 750                                     | 5.89                  | 8.93                     | 0.44                       | Bin et al (2016) <sup>22</sup>   |
| J71:ITIC                    | 750                                     | 9.85                  | 11.40                    | 0.31                       | Bin et al (2016) <sup>23</sup>   |
| PTzBI-DT:ITIC               | 750                                     | 8.42                  | 9.43                     | 0.33                       | Fan et al (2017) <sup>24</sup>   |
| PBQ-4F:ITIC                 | 750                                     | 10.15                 | 11.34                    | 0.28                       | Zheng et al (2017) <sup>25</sup> |
| PBZ-m-CF3:ITIC              | 750                                     | 9.51                  | 10.60                    | 0.22                       | Li et al (2018) <sup>26</sup>    |
| PBDT-S-2TC:ITIC             | 750                                     | 8.60                  | 10.12                    | 0.34                       | An et al (2018) <sup>27</sup>    |
| PTzBI:ITIC                  | 750                                     | 9.10                  | 10.24                    | 0.30                       | Fan et al (2017) <sup>28</sup>   |
| PBPD-Th:ITIC                | 750                                     | 8.72                  | 10.80                    | 0.28                       | Fan et al (2017) <sup>29</sup>   |
| PTBFBz:ITIC                 | 750                                     | 6.86                  | 8.33                     | 0.42                       | Gao et al (2018) <sup>30</sup>   |
| PDCBT:ITIC                  | 750                                     | 8.90                  | 10.16                    | 0.33                       | Qin et al (2016) <sup>31</sup>   |
| asy-PBDBTN:ITIC             | 750                                     | 8.33                  | 10.50                    | 0.37                       | Li et al (2017) <sup>32</sup>    |
| PTBTz-2:ITIC                | 750                                     | 8.76                  | 10.92                    | 0.37                       | Bao et al (2017) <sup>33</sup>   |
| HD-PBDT2FT:ITIC             | 750                                     | 6.60                  | 8.70                     | 0.47                       | Xia et al (2016) <sup>34</sup>   |
| HFQx-T:ITIC                 | 750                                     | 7.89                  | 9.40                     | 0.38                       | Xu et al (2017) <sup>35</sup>    |
| PBTCl:ITIC                  | 750                                     | 5.82                  | 7.57                     | 0.46                       | Wang et al (2017) <sup>36</sup>  |
| PM6:ITIC                    | 750                                     | 8.02                  | 9.70                     | 0.38                       | Wang et al (2017) <sup>37</sup>  |
| PαNBDT-T1:ITIC              | 750                                     | 8.68                  | 9.60                     | 0.25                       | Liu et al (2017) <sup>38</sup>   |
| PBDTTz-BP:ITIC              | 750                                     | 7.09                  | 8.03                     | 0.25                       | Wen et al (2018) <sup>39</sup>   |
| PBDTTz-N:ITIC               | 750                                     | 5.42                  | 6.61                     | 0.26                       | Wen et al (2018) <sup>39</sup>   |
| PBDTS-NQx:ITIC              | 750                                     | 10.82                 | 11.50                    | 0.34                       | Yu et al (2017) <sup>40</sup>    |
| PBDTSF-FBT:ITIC             | 750                                     | 9.77                  | 11.12                    | 0.34                       | Zhang et al (2018) <sup>41</sup> |
| PBDTS-TDZ:ITIC              | 750                                     | 11.57                 | 12.80                    | 0.25                       | Xu et al (2018) <sup>42</sup>    |

|                                 |      |       |       |      |                                        |
|---------------------------------|------|-------|-------|------|----------------------------------------|
| 3MTB:ITIC                       | 750  | 7.14  | 8.22  | 0.38 | Hoang et al (2018) <sup>43</sup>       |
| PDRCNBDT:ITIC                   | 750  | 3.91  | 5.30  | 0.61 | Liao et al (2018) <sup>44</sup>        |
| PDTP4TFBT:ITIC                  | 750  | 7.11  | 9.20  | 0.40 | An et al (2017) <sup>45</sup>          |
| PBDTsThPh-BDD:ITIC              | 750  | 9.82  | 10.51 | 0.35 | Liu et al (2018) <sup>46</sup>         |
| 3MTTh:ITIC                      | 750  | 8.81  | 9.73  | 0.21 | Park et al (2017) <sup>47</sup>        |
| PTzBI-Ph:ITIC                   | 750  | 9.53  | 10.20 | 0.37 | Zhu et al (2018) <sup>48</sup>         |
| PBDB-T:IT-M                     | 740  | 10.77 | 11.20 | 0.24 | Li et al (2018) <sup>49</sup>          |
| PBDTBDD:ITIC-M                  | 740  | 11.24 | 11.69 | 0.29 | Shi et al (2017) <sup>50</sup>         |
| PDCBT-2F:IT-M                   | 740  | 5.63  | 6.60  | 0.55 | Zhang et al (2016) <sup>51</sup>       |
| PBDB-T:IDT-HN                   | 660  | 8.97  | 10.22 | 0.30 | Li et al (2018) <sup>52</sup>          |
| PBDB-T:IT-OM-2                  | 740  | 9.88  | 11.50 | 0.35 | Li et al (2017) <sup>53</sup>          |
| PBTIBDTT-S:ITIC-F               | 770  | 8.63  | 10.50 | 0.40 | Li et al (2018) <sup>54</sup>          |
| PBDB-T-SF:IT-4F                 | 760  | 11.92 | 13.10 | 0.22 | Zhao et al (2017) <sup>55</sup>        |
| PBDBT-F:IT-4F                   | 760  | 12.21 | 13.35 | 0.17 | Ye et al (2019) <sup>56</sup>          |
| DRTB-T-C2:IT-4F                 | 760  | 9.11  | 11.24 | 0.33 | Yang et al (2018) <sup>57</sup>        |
| PM7:IT-4F                       | 760  | 11.16 | 13.10 | 0.21 | Fan et al (2018) <sup>58</sup>         |
| PDTB-EF-T:IT-4F                 | 760  | 12.91 | 14.20 | 0.20 | Li et al (2018) <sup>59</sup>          |
| PBDB-TF:IT-2F:IT-4F             | 760  | 11.67 | 13.64 | 0.25 | Gao et al (2018) <sup>60</sup>         |
| PBDB-TF:IDTN                    | 750  | 9.80  | 12.20 | 0.40 | Li et al (2017) <sup>61</sup>          |
| PB3T:IT-M                       | 740  | 11.30 | 11.90 | 0.16 | Liu et al (2017) <sup>62</sup>         |
| FTAZ:INIC3                      | 780  | 10.50 | 11.50 | 0.23 | Dai et al (2017) <sup>63</sup>         |
| PM6:IT-4F                       | 760  | 10.97 | 13.92 | 0.28 | Jung et al (2020) <sup>64</sup>        |
| PffBT4T-2DT:SF-PDI <sub>2</sub> | 590  | 5.15  | 6.30  | 0.53 | Zhao et al (2015) <sup>65</sup>        |
| PTzBI:N2200                     | 780  | 6.22  | 9.16  | 0.48 | Fan et al (2017) <sup>66</sup>         |
| PTB7-Th:ITIC-Th                 | 740  | 7.95  | 8.70  | 0.42 | Lin et al (2016) <sup>67</sup>         |
| PDBT-T1:ITIC-Th                 | 740  | 8.46  | 9.60  | 0.36 | Lin et al (2018) <sup>67</sup>         |
| PCE10:IDTBR:IDFBR               | 750  | 10.90 | 11.40 | 0.22 | Baran et al (2017) <sup>68</sup>       |
| PTB7-Th:ITIC                    | 740  | 5.65  | 6.28  | 0.49 | Lin et al (2015) <sup>69</sup>         |
| PTB7-Th:CTIC-4F                 | 910  | 10.39 | 10.90 | 0.34 | Lee et al (2019) <sup>70</sup>         |
| PTB7-Th:CO1-4F                  | 1020 | 9.12  | 10.20 | 0.39 | Lee et al (2019) <sup>70</sup>         |
| PTB7-Th:COTIC-4F                | 1120 | 5.03  | 7.30  | 0.54 | Lee et al (2019) <sup>70</sup>         |
| PBDB-T-2F:IT-4Cl                | 790  | 9.86  | 12.39 | 0.27 | Zhang et al (2018) <sup>71</sup>       |
| PM6:Y6                          | 870  | 15.13 | 15.70 | 0.18 | Yuan et al (2019) <sup>72</sup>        |
| DPP2T:IEICO-4F                  | 950  | 6.62  | 9.13  | 0.60 | Lee et al (2020) <sup>73</sup>         |
| FTAZ:IEICO4F:PCBM               | 950  | 5.06  | 7.78  | 0.40 | Ravishankar et al (2021) <sup>11</sup> |
| PTB7-Th:IEICO-4F                | 950  | 10.48 | 12.80 | 0.48 | Song et al (2018) <sup>74</sup>        |
| FTAZ:IT-M                       | 740  | 8.89  | 10.80 | 0.31 | Ye et al (2018) <sup>75</sup>          |

a: Source of Reference opaque device data for each active layer blend is indicated in the superscript.  
b: Absorption edge is the wavelength of the active layer blend beyond which there is negligible absorption. This is marked by the change in slope in the absorption curve.

**TABLE S5. Parameters associated with locations simulated to model ST-OSC greenhouses.**

| Climate description              | Simulated location | Coordinates           | Night shade sch. <sup>a</sup> | Day shade sch. <sup>b</sup> | Base LCOE <sup>c</sup> (\$/kWh) | Optimistic LCOE (\$/kWh) | Conservative LCOE <sup>c</sup> (\$/kWh) | NPV for conventional greenhouse per unit floor area (\$/m <sup>2</sup> ) |
|----------------------------------|--------------------|-----------------------|-------------------------------|-----------------------------|---------------------------------|--------------------------|-----------------------------------------|--------------------------------------------------------------------------|
| Tropical rainforest              | Singapore          | 1.35 °N<br>103.82 °E  | No                            | Jan-Dec                     | 0.12                            | 0.11                     | 0.21                                    | Lettuce: 285.88<br>Tomato: -307.44                                       |
| Tropical monsoon                 | Miami              | 25.76 °N<br>80.19 °W  | No                            | Apr-Oct                     | 0.12                            | 0.10                     | 0.20                                    | Lettuce: 474.15<br>Tomato: -8.69                                         |
| Tropical savanna with dry winter | Chennai            | 13.08 °N<br>80.27 °E  | No                            | Jan-Dec                     | 0.11                            | 0.10                     | 0.19                                    | Lettuce: 338.40<br>Tomato: -321.35                                       |
| Tropical savanna with dry summer | Sao Luis           | 2.53 °S<br>44.26 °W   | No                            | Jan-Dec                     | 0.10                            | 0.09                     | 0.18                                    | Lettuce: 393.96<br>Tomato: -84.91                                        |
| Arid hot                         | Phoenix            | 33.44 °N<br>112.07 °W | Jan-Dec                       | Apr-Oct                     | 0.10                            | 0.09                     | 0.18                                    | Lettuce: 669.75<br>Tomato: -18.26                                        |
| Arid cold                        | El Paso            | 31.76 °N<br>106.48 °W | Jan-Mar;<br>Nov-Dec           | May-Sep                     | 0.10                            | 0.09                     | 0.18                                    | Lettuce: 745.66<br>Tomato: -3.96                                         |
| Semi-arid hot                    | Jodhpur            | 26.23 °N<br>73.02 °E  | Jan-Feb;<br>Dec               | Apr-Nov                     | 0.11                            | 0.10                     | 0.20                                    | Lettuce: 519.48<br>Tomato: -41.25                                        |
| Semi-arid cold                   | Denver             | 39.73 °N<br>104.99 °W | Jan-May;<br>Sep-Dec           | No                          | 0.12                            | 0.11                     | 0.21                                    | Lettuce: 763.22<br>Tomato: 138.74                                        |
| Temperate humid subtropic        | Raleigh            | 35.78 °N<br>78.64 °W  | Jan-Mar;<br>Nov-Dec           | Jun-Aug                     | 0.13                            | 0.11                     | 0.22                                    | Lettuce: 671.35<br>Tomato: -3.96                                         |

|                                     |              |                       |                     |         |      |      |      |                                   |
|-------------------------------------|--------------|-----------------------|---------------------|---------|------|------|------|-----------------------------------|
| Temperate oceanic                   | London       | 51.51 °N<br>0.12 °W   | All                 | No      | 0.20 | 0.18 | 0.35 | Lettuce: 523.27<br>Tomato: 153.69 |
| Temperate oceanic subpolar          | Unalaska     | 54.88 °N<br>166.53 °W | All                 | No      | 0.22 | 0.20 | 0.38 | Lettuce: 471.24<br>Tomato: 234.50 |
| Temperate monsoon subtropic         | Guwahati     | 26.14 °N<br>91.73 °E  | Jan                 | Apr-Oct | 0.12 | 0.11 | 0.21 | Lettuce: 398.32<br>Tomato: -86.26 |
| Temperate highland                  | Johannesburg | 26.20 °S<br>28.04 °E  | Apr-Sep             | No      | 0.10 | 0.09 | 0.17 | Lettuce: 764.81<br>Tomato: 217.68 |
| Temperate hot summer mediterranean  | Sacramento   | 38.58 °N<br>121.50 °W | Jan, Dec            | Apr-Oct | 0.11 | 0.10 | 0.19 | Lettuce: 695.27<br>Tomato: -31.19 |
| Temperate warm summer mediterranean | Seattle      | 47.60 °N<br>122.33 °W | Jan-Jun;<br>Sep-Dec | No      | 0.16 | 0.15 | 0.29 | Lettuce: 662.20<br>Tomato: 102.88 |
| Snow hot summer humid               | Chicago      | 41.87 °N<br>87.62 °W  | Jan-May;<br>Oct-Dec | No      | 0.15 | 0.13 | 0.25 | Lettuce: 675.38<br>Tomato: 114.21 |
| Snow warm summer humid              | Antigo       | 45.14 °N<br>89.15 °W  | Jan-May;<br>Oct-Dec | No      | 0.15 | 0.14 | 0.27 | Lettuce: 627.38<br>Tomato: 97.60  |
| Snow subarctic                      | Leadville    | 39.25 °N<br>106.29 °W | All                 | No      | 0.12 | 0.11 | 0.21 | Lettuce: 748.58<br>Tomato: 175.04 |
| Snow hot summer humid               | Pyongyang    | 39.03 °N<br>125.76 °E | Jan-May;<br>Oct-Dec | Jul-Aug | 0.14 | 0.12 | 0.24 | Lettuce: 659.00<br>Tomato: 113.17 |
| Snow warm summer monsoon            | Calgary      | 51.04 °N<br>114.07 °W | All                 | No      | 0.16 | 0.14 | 0.28 | Lettuce: 657.67<br>Tomato: 143.62 |

|                                |                  |                       |                     |         |      |      |      |                                   |
|--------------------------------|------------------|-----------------------|---------------------|---------|------|------|------|-----------------------------------|
| Snow monsoon subarctic         | Yushu city       | 33.01 °N<br>97.09 °W  | All                 | No      | 0.12 | 0.10 | 0.20 | Lettuce: 754.15<br>Tomato: 153.51 |
| Snow hot summer mediterranean  | Salt Lake City   | 40.76 °N<br>111.89 °W | Jan-May;<br>Oct-Dec | Jul-Aug | 0.12 | 0.10 | 0.20 | Lettuce: 768.50<br>Tomato: 167.24 |
| Snow warm summer mediterranean | South Lake Tahoe | 38.94 °N<br>119.97 °W | All                 | No      | 0.11 | 0.09 | 0.18 | Lettuce: 724.59<br>Tomato: 169.09 |
| Snow subarctic mediterranean   | Anchorage        | 61.21 °N<br>149.90 °W | All                 | No      | 0.13 | 0.12 | 0.23 | Lettuce: 662.68<br>Tomato: 249.09 |
| Polar tundra                   | Mount Washington | 44.27 °N<br>71.30 °W  | All                 | No      | 0.16 | 0.14 | 0.27 | Lettuce: 675.55<br>Tomato: 218.82 |

<sup>a</sup>Night shading is applicable to both ST-OSC and reference greenhouses.

<sup>b</sup>Day shading is applicable to only reference greenhouses.

<sup>c</sup>Levelized cost of electricity defined as the ratio of current value of all future cost of fabricating and operating ST-OSC over its lifetime and power generation.

**TABLE S6. Input parameters for calculating NPV.**

| Parameter                                                                            | Base case input | Optimistic input | Conservative input | Reference                                                                      |
|--------------------------------------------------------------------------------------|-----------------|------------------|--------------------|--------------------------------------------------------------------------------|
| Minimum sustainable price of OSC (Manufacturing cost + overhead) <sup>a</sup> (\$/W) | 0.43            | 0.43             | 0.70               | Kalowekamo and Baker (2009) <sup>76</sup>                                      |
| Inverter price (\$/W)                                                                | 0.063           | 0.063            | 0.20               | Song et al (2017) <sup>77</sup><br>Sommerfeldt and Madani (2017) <sup>78</sup> |
| BOS equipment (\$/W)                                                                 | 0.24            | 0.24             | 0.66               | Song et al (2017) <sup>77</sup><br>Gambhir et al (2016) <sup>79</sup>          |
| Installation labor and associated costs (\$/W)                                       | 0.20            | 0.20             | 0.20               | Song et al (2017) <sup>77</sup>                                                |
| OSC annual operation and maintenance cost (\$/W)                                     | 0.014           | 0.014            | 0.014              | Song et al (2017) <sup>77</sup>                                                |
| DC to AC power ratio                                                                 | 1.40            | 1.40             | 1.40               | Jones-Albertus et al (2016) <sup>80</sup>                                      |

|                                                         |                              |                              |                              |                                                                                       |
|---------------------------------------------------------|------------------------------|------------------------------|------------------------------|---------------------------------------------------------------------------------------|
| DC to AC conversion loss (%)                            | 30                           | 30                           | 30                           | Jones-Albertus et al (2016) <sup>80</sup>                                             |
| Inverter lifetime (years)                               | 20                           | 20                           | 20                           | Song et al (2017) <sup>77</sup>                                                       |
| Module PCE degradation rate (%/year)                    | 2                            | 1                            | 4                            | Yang et al (2021) <sup>81</sup>                                                       |
| Initial PCE (%)                                         | 8.60                         | 8.60                         | 8.60                         | Yang et al (2021) <sup>81</sup>                                                       |
| Lifetime of solar cell (years)                          | 10                           | 20                           | 5                            | Gambhir et al (2016) <sup>79</sup><br>Hollingsworth et al (2020) <sup>82</sup>        |
| Lifetime of greenhouse structure (years)                | 30                           | 30                           | 30                           | Boulard et al (2011) <sup>83</sup>                                                    |
| Discount rate (%)                                       | 10                           | 10                           | 10                           | Hollingsworth et al (2020) <sup>82</sup>                                              |
| Geometric fill factor                                   | 0.85                         | 0.90                         | 0.80                         | Ravishankar et al (2020) <sup>4</sup>                                                 |
| Large scale efficiency retention (%)                    | 100                          | 100                          | 75                           | Anderson et al (2020) <sup>84</sup>                                                   |
| Cost of electricity (\$/kWh) <sup>b</sup>               | 0.16                         | 0.16                         | 0.16                         | The world bank – price of electricity (2019) <sup>85</sup>                            |
| Cost of natural gas (\$/MMBtu) <sup>b</sup>             | 7.55                         | 7.55                         | 7.55                         | U.S. energy information administration (2021) <sup>86</sup>                           |
| Cost of land (\$/acre)                                  | 17000                        | 17000                        | 17000                        | Hollingsworth et al (2020) <sup>82</sup>                                              |
| Cost of greenhouse structure (\$/m <sup>2</sup> )       | 270                          | 270                          | 270                          | Hollingsworth et al (2020) <sup>82</sup>                                              |
| Fertilizer, water, and labor costs (\$/m <sup>2</sup> ) | 25                           | 25                           | 25                           | Hollingsworth et al (2020) <sup>82</sup>                                              |
| Market value of crop (\$/kg)                            | Lettuce: 3.15<br>Tomato: 4.4 | Lettuce: 3.15<br>Tomato: 4.4 | Lettuce: 3.15<br>Tomato: 4.4 | Ohio state University: Hydroponic crop program: economic budgets (2011) <sup>87</sup> |
| Planting density (plants/m <sup>2</sup> )               | Lettuce: 18<br>Tomato: 4     | Lettuce: 18<br>Tomato: 4     | Lettuce: 18<br>Tomato: 4     | Henten (1994) <sup>7</sup><br>Jones et al (1991) <sup>12</sup>                        |

<sup>a</sup> Manufacturing cost comprises of material, maintenance, utilities, labor, and depreciation costs. At the end of OSC lifetime, its present value is valued at 50 % of the original manufacturing cost. Overhead costs comprise of costs associated with manufacturing operations (e.g., scales, general and administrative (SG&A); research and development (R&D) costs; taxes and interest) and weighted average cost of capital (WACC).

<sup>b</sup> Cost of electricity and natural gas is assumed to increase by 1 % every year.



**TABLE S7. Lighting requirements for tomato at various growth stages.**

| Growth stage | Daily Light Integral (moles m <sup>-2</sup> day <sup>-1</sup> ) |
|--------------|-----------------------------------------------------------------|
| Seedling     | 13-16                                                           |
| Grafting     | 5-7                                                             |
| Production   | 20-50                                                           |

**Table S7. Nomenclature for parameters in model.**

| <b>Lettuce growth model</b> |                                                                                                                   |
|-----------------------------|-------------------------------------------------------------------------------------------------------------------|
| $\epsilon$                  | – Light use efficiency at very high CO <sub>2</sub> concentration. ( $\mu\text{mol CO}_2/\text{J}$ )              |
| $\Phi_{d,n}$                | – Light flux leaving layer n within the plant canopy in the downward direction. ( $\text{W}/\text{m}^2$ )         |
| $\Phi_{d,n+1}$              | – Light flux leaving layer n+1 within the plant canopy in the downward direction. ( $\text{W}/\text{m}^2$ )       |
| $\Phi_I$                    | – Light flux incident through a leaf. ( $\text{W}/\text{m}^2$ )                                                   |
| $\Phi_T$                    | – Light flux transmitted through a leaf. ( $\text{W}/\text{m}^2$ )                                                |
| $\Phi_{u,n}$                | – Light flux leaving layer n within the plant canopy in the upward direction. ( $\text{W}/\text{m}^2$ )           |
| $\Phi_{u,n+1}$              | – Light flux leaving layer n+1 within the plant canopy in the upward direction. ( $\text{W}/\text{m}^2$ )         |
| $\tau$                      | – CO <sub>2</sub> compensation point ( $\mu\text{mol CO}_2 \text{ mol}^{-1}$ )                                    |
| $\tau_{25}$                 | – CO <sub>2</sub> compensation at 25 <sup>0</sup> C ( $\mu\text{mol CO}_2 \text{ mol}^{-1}$ )                     |
| $\sigma$                    | – scattering coefficient.                                                                                         |
| $\rho_c$                    | – Plant canopy reflection coefficient.                                                                            |
| $\Phi_{\text{PSII}}$        | – Quantum yield of PSII                                                                                           |
| $\Delta L$                  | – Assumed gap between leaves.                                                                                     |
| $c_\alpha$                  | – Factor converting CO <sub>2</sub> assimilated into CH <sub>2</sub> O.                                           |
| $c_\beta$                   | – Respiratory and synthesis losses of non-structural material due to growth.                                      |
| $c_\epsilon$                | – Slope of the linear part of the photosynthesis-light curve. ( $\mu\text{mol CO}_2/\text{J}$ ).                  |
| $c_\tau$                    | – Ratio of root dry weight as a function of total dry weight.                                                     |
| $C_a$                       | – Greenhouse CO <sub>2</sub> concentration ( $\mu\text{mol CO}_2 \text{ mol}^{-1}$ ).                             |
| $c_{\text{resp,sh}}t$       | – Maintenance respiration coefficient for the shoot at 25 <sup>0</sup> C                                          |
| $c_{\text{resp,rt}}$        | – Maintenance respiration coefficient for the root at 25 <sup>0</sup> C                                           |
| $C_{Q10,\text{resp}}$       | – Q10 factor for maintenance respiration.                                                                         |
| $f_{\text{phot,inst}}$      | – The photosynthetic assimilation at a particular depth. ( $\mu\text{moles CO}_2/\text{m}^2\text{-s}$ )           |
| $f_{\text{phot,local}}$     | – Local assimilation rate at a considered depth in a plant canopy. ( $\mu\text{moles CO}_2/\text{m}^2\text{-s}$ ) |

$f_{\text{phot,gros}}$  – Plant canopy assimilation rate. ( $\mu\text{moles CO}_2/\text{m}^2\text{-s}$ )  
 $\epsilon$  – Light use efficiency at very high  $\text{CO}_2$  concentration. ( $\mu\text{mol CO}_2/\text{J}$ )  
 $\Phi_{d,n}$  – Light flux leaving layer n within the plant canopy in the downward direction. ( $\text{W}/\text{m}^2$ )  
 $\Phi_{d,n+1}$  – Light flux leaving layer n+1 within the plant canopy in the downward direction. ( $\text{W}/\text{m}^2$ )  
 $\Phi_I$  – Light flux incident through a leaf. ( $\text{W}/\text{m}^2$ )  
 $\Phi_T$  – Light flux transmitted through a leaf. ( $\text{W}/\text{m}^2$ )  
 $\Phi_{u,n}$  – Light flux leaving layer n within the plant canopy in the upward direction. ( $\text{W}/\text{m}^2$ )  
 $\Phi_{u,n+1}$  – Light flux leaving layer n+1 within the plant canopy in the upward direction. ( $\text{W}/\text{m}^2$ )  
 $\tau$  –  $\text{CO}_2$  compensation point ( $\mu\text{mol CO}_2 \text{ mol}^{-1}$ )  
 $\tau_{25}$  –  $\text{CO}_2$  compensation at  $25^\circ\text{C}$  ( $\mu\text{mol CO}_2 \text{ mol}^{-1}$ )  
 $\sigma$  – scattering coefficient.  
 $\rho_c$  – Plant canopy reflection coefficient.  
 $\Phi_{\text{PSII}}$  – Quantum yield of PSII  
 $\Delta L$  – Assumed gap between leaves.  
 $c_\alpha$  – Factor converting  $\text{CO}_2$  assimilated into  $\text{CH}_2\text{O}$ .  
 $c_\beta$  – Respiratory and synthesis losses of non-structural material due to growth.  
 $c_\epsilon$  – Slope of the linear part of the photosynthesis-light curve. ( $\mu\text{mol CO}_2/\text{J}$ ).  
 $c_\tau$  – Ratio of root dry weight as a function of total dry weight.  
 $C_a$  – Greenhouse  $\text{CO}_2$  concentration ( $\mu\text{mol CO}_2 \text{ mol}^{-1}$ ).  
 $c_{\text{resp,sh}}t$  – Maintenance respiration coefficient for the shoot at  $25^\circ\text{C}$   
 $c_{\text{resp,rt}}$  – Maintenance respiration coefficient for the root at  $25^\circ\text{C}$   
 $C_{\text{Q10,resp}}$  – Q10 factor for maintenance respiration.  
 $f_{\text{phot,inst}}$  – The photosynthetic assimilation at a particular depth. ( $\mu\text{moles CO}_2/\text{m}^2\text{-s}$ )  
 $f_{\text{phot,local}}$  – Local assimilation rate at a considered depth in a plant canopy. ( $\mu\text{moles CO}_2/\text{m}^2\text{-s}$ )

$f_{\text{phot,gros}}$  – Plant canopy assimilation rate. ( $\mu\text{moles CO}_2/\text{m}^2\text{-s}$ )  
 $F_{\text{mm}}$  – Light saturated maximum rate of photosynthesis. ( $\mu\text{moles CO}_2/\text{m}^2\text{-s}$ )  
 $F_{\text{nc}}$  –  $\text{CO}_2$  saturated rate of photosynthesis. ( $\mu\text{moles CO}_2/\text{m}^2\text{-s}$ )  
 $f_{\text{photmax}}$  – Maximum rate of photosynthesis. ( $\mu\text{moles CO}_2/\text{m}^2\text{-s}$ )  
 $\text{frac}_{\text{sun}}$  – Fraction of leaves that intercepts direct solar radiation.  
 $f_{\text{resp}}$  – Maintenance respiration loss of plants ( $\text{g m}^{-2} \text{s}^{-1}$ )  
 $I_{\text{abs,par}}$  – Absorbed light in the Photosynthetically Active Radiation (PAR) region. ( $\text{W}/\text{m}^2$ )  
 $I_{\text{diff}}$  – Total absorption per plant canopy depth in terms of leaf area for diffuse light. ( $\text{W}/\text{m}^2$ )  
 $I_{\text{direct,total}}$  – Total absorption per plant canopy depth in terms of leaf area for direct light. ( $\text{W}/\text{m}^2$ )  
 $I_{\text{direct,incident}}$  – Incident direct sunlight. ( $\text{W}/\text{m}^2$ )  
 $I_{\text{sunlit,direct}}$  – Total absorption by leaves through direct sunlight. ( $\text{W}/\text{m}^2$ )  
 $I_{\text{total,diffuse}}$  – Total absorption by shaded leaves using diffuse and scattered sunlight. ( $\text{W}/\text{m}^2$ )  
 $I_{\text{total,direct}}$  – Total absorption by leaves exposed to direct sunlight. ( $\text{W}/\text{m}^2$ )  
 $L$  – Leaf Area Index.  
 $l_{\text{aic}}$  – Leaf Area Index at a particular depth in the plant canopy.  
 $\text{PEEC}_{\text{bl}}$  – Extinction coefficient of leaves assuming no scattering.  
 $\text{PEEC}_{\text{diff}}$  – Extinction coefficient of leaves in spherical configuration exposed to diffuse radiation.  
 $\text{PEEC}_{\text{direct}}$  – Extinction coefficient of leaves with incident direct radiation.  
 $\text{PEEC}_{\text{spher,I}}$  – Extinction coefficient for leaves in spherical configuration at a given incidence angle.  
 $R$  – reflectance of light.  
 $r_{\text{b}}$  – Boundary layer resistance. ( $\text{s}/\text{m}$ )  
 $r_{\text{gr}}$  – Relative growth rate. ( $\text{s}^{-1}$ )  
 $r_{\text{m}}$  – Mesophyll resistance. ( $\text{s}/\text{m}$ )  
 $r_{\text{s}}$  – Stomatal resistance. ( $\text{s}/\text{m}$ )  
 spectral-factor – parameter impacting maximum rate of photosynthesis as a function of spectra.  
 $T$  – Transmittance of light.

$\text{temp}_{\text{plant}}$  – Greenhouse plant temperature ( $^{\circ}\text{C}$ )

$X_{\text{gauss}}$  – Gaussian integration values to compute fraction of leaf area at different depths.

$W_{\text{gauss}}$  – Gaussian integration values to compute weight of assimilated photosynthesis at different depths.

$X_{\text{nsdw}}$  – Non-structural dry weight ( $\text{g}/\text{m}^2$ )

$X_{\text{sdw}}$  – Structural dry weight ( $\text{g}/\text{m}^2$ )

$y$  – A dimensionless function of absorbed sunlight (PAR).

### **Tomato growth model**

$\alpha_{\text{F}}$  – Maximum partitioning of new growth to fruit (fraction  $\text{d}^{-1}$ )

$\rho$  – Plant density (no. plants  $\text{m}^{-2}$ -ground)

$\delta$  – Maximum leaf area expansion per node ( $\text{m}^2$ -leaf  $\text{node}^{-1}$ )

$\beta$  – Coefficient ( $\text{node}^{-1}$ )

$v$  – Transition coefficient between vegetative and full fruit growth ( $\text{node}^{-1}$ )

$\lambda(\text{temp}_{\text{plant}})$  – Temperature function to reduce rate of leaf area expansion

$\text{CO}_2$  – Available  $\text{CO}_2$  (ppm)

$D$  – Conversion factor from  $\mu\text{mol CO}_2 \text{ m}^{-2} \text{ s}^{-1}$  to  $\text{g CO}_2 \text{ m}^{-2} \text{ day}^{-1}$

$E$  – Growth efficiency, ratio of biomass to photosynthate available for growth ( $\text{g-d.w. g}^{-1} (\text{CH}_2\text{O})$ )

$f_{\text{F}}$  – Parameter to modify partitioning to fruit.

$f_{\text{R}}(\text{N})$  – Fraction of partitioning of biomass to roots as a function of development (node).

$f_{\text{N}}(\text{temp}_{\text{plant}})$  - Function to modify node development rate as a function of hourly temperature.

$\text{LAI}_{\text{max}}$  – Maximum Leaf Area Index.

$m$  – Leaf light transmission coefficient .

$N_{\text{b}}$  – Coefficient relating node to leaf area index.

$N_{\text{FF}}$  – Nodes per plant when first fruit appears.

$N_{\text{m}}$  – Maximum rate of node appearance at normal temperature.

$p_1$  – Loss of leaf d.w. per node after  $\text{LAI}_{\text{max}}$  is achieved. ( $\text{g-leaf d}^{-1}$ )

$P_{\text{g,max}}$  – Light saturated leaf  $\text{CO}_2$  assimilation rate ( $\mu\text{mol CO}_2 \text{ m}^{-2} \text{ s}^{-1}$ )

$\text{PEEC}_{\text{tomato}}$  – Plant effective extinction coefficient for tomato.

$Q_e$  – Leaf Quantum efficiency ( $\mu\text{mol CO}_2 \mu\text{mol}^{-1}$  photons)  
 $Q_{10}$  – Coefficient in maintenance respiration equation  
 $r_f$  – Respiration coefficient for growing mass ( $\text{g-CH}_2\text{O m}^{-2}\text{-ground d}^{-1}$ )  
 $r_m$  – Respiration coefficient for fruit ( $\text{g-CH}_2\text{O m}^{-2}\text{-ground d}^{-1}$ )  
temp-factor – Factor accounting for the effect of ambient temperature on gross assimilation.  
temp<sub>crit</sub> – Mean daytime temperature above which fruit abortion starts.  
 $V_{\text{max}}$  – Maximum increase in vegetative tissue d.w. growth per node. ( $\text{g-d.w. node}^{-1}$ ).

## References

- 1 J. Goudriaan and H. H. van Laar, *Modelling potential crop growth processes. Textbook with exercises*, Springer Science & Business Media, Dordrecht, Netherlands, 1994.
- 2 E. J. Van Henten, *Agric. Syst.*, 1994, **45**, 55-72.
- 3 ASHRAE, *HVAC APPLICATIONS*, Atlanta, USA, 2015.
- 4 E. Ravishankar, R. E. Booth, C. Saravitz, H. Sederoff, H. W. Ade and B. T. O'Connor, *Joule*, 2020, **4**, 490–506.
- 5 L. F. M. Marcelis, E. Heuvelink and J. Goudriaan, *Sci. Hortic.*, 1998, **74**, 83-111.
- 6 J. Wang, W. Lu, Y. Tong and Q. Yang, *Front. Plant Sci.*, 2016, **7**, 1-10.
- 7 E. J. Van Henten, *Agric. Syst.*, 1994, **45**, 55–72.
- 8 K. Eskins, *Physiol. Plant.*, 1992, **86**, 439–444.
- 9 K. R. Cope, M. C. Snowden and B. Bugbee, *Photochem. Photobiol.*, 2014, **90**, 574-584.
- 10 W. Fu, P. Li and Y. Wu, *Sci. Hortic. (Amsterdam)*, 2012, **135**, 45–51.
- 11 E. Ravishankar, M. Charles, Y. Xiong, R. Henry, J. Swift, J. Rech, J. Calero, S. Cho, R. E. Booth, T. Kim, A. H. Balzer, Y. Qin, C. Hoi Yi Ho, F. So, N. Stingelin, A. Amassian, C. Saravitz, W. You, H. Ade, H. Sederoff and B. T. O'Connor, *Cell Reports Phys. Sci.*, 2021, **2**, 100381.
- 12 J. W. Jones, A. Kenig and C. E. Vallejos, *Trans. Am. Soc. Agric. Eng.*, 1999, **42**, 255-265.
- 13 J. Scholberg, B. L. McNeal, J. W. Jones, K. J. Boote, C. D. Stanley and T. A. Obreza, *Agron. J.*, 2000, **92**, 152–159.
- 14 B. Acock, D. A. Charles-edwards, D. J. Fitter, D. W. Hand, L. J. Ludwig, J. Warren Wilson and A. C. Withers, *J. Exp. Bot.*, 1978, **29**, 815–827.

- 15 E. Dayan, H. van Keulen, J. W. Jones, I. Zipori, D. Shmuel and H. Challa, *Agric. Syst.*, 1993, **43**, 165–183.
- 16 M. C. Peel, B. L. Finlayson and T. A. McMahon, *Hydrol. Earth Syst. Sci.*, 2007, **11**, 1633–1644.
- 17 K. R. Cope, M. C. Snowden and B. Bugbee, *Photochem. Photobiol.*, 2014, **90**, 574–584.
- 18 W. Fu, P. Li and Y. Wu, *Sci. Hortic.*, 2012, **135**, 45–51.
- 19 K. Wang, J. Lv, T. Duan, Z. Li, Q. Yang, J. Fu, W. Meng, T. Xu, Z. Xiao, Z. Kan, K. Sun and S. Lu, *ACS Appl. Mater. Interfaces*, 2019, **11**, 6717–6723.
- 20 Q. Liu, Y. Jiang, K. Jin, J. Qin, J. Xu, W. Li, J. Xiong, J. Liu, Z. Xiao, K. Sun, S. Yang, X. Zhang and L. Ding, *Sci. Bull.*, 2020, **65**, 272–275.
- 21 M. B. Upama, M. Wright, M. A. Mahmud, N. K. Elumalai, A. Mahboubi Soufiani, D. Wang, C. Xu and A. Uddin, *Nanoscale*, 2017, **9**, 18788–18797.
- 22 H. Bin, Z. G. Zhang, L. Gao, S. Chen, L. Zhong, L. Xue, C. Yang and Y. Li, *J. Am. Chem. Soc.*, 2016, **138**, 4657–4664.
- 23 H. Bin, L. Gao, Z. G. Zhang, Y. Yang, Y. Zhang, C. Zhang, S. Chen, L. Xue, C. Yang, M. Xiao and Y. Li, *Nat. Commun.*, 2016, **7**, 1–11.
- 24 B. Fan, L. Ying, P. Zhu, F. Pan, F. Liu, J. Chen, F. Huang and Y. Cao, *Adv. Mater.*, 2017, **29**, 1–7.
- 25 Z. Zheng, O. M. Awartani, B. Gautam, D. Liu, Y. Qin, W. Li, A. Bataller, K. Gundogdu, H. Ade and J. Hou, *Adv. Mater.*, 2017, **29**, 3–8.
- 26 W. Li, G. Li, X. Guo, Y. Wang, H. Guo, Q. Xu, M. Zhang and Y. Li, *J. Mater. Chem. A*, 2018, **6**, 6551–6558.
- 27 Y. An, X. Liao, L. Chen, J. Yin, Q. Ai, Q. Xie, B. Huang, F. Liu, A. K. Y. Jen and Y. Chen, *Adv. Funct. Mater.*, 2018, **28**, 1–9.
- 28 B. Fan, K. Zhang, X. F. Jiang, L. Ying, F. Huang and Y. Cao, *Adv. Mater.*, 2017, **29**, 1606396-1606403.
- 29 Q. Fan, Z. Xu, X. Guo, X. Meng, W. Li, W. Su, X. Ou, W. Ma, M. Zhang and Y. Li, *Nano Energy*, 2017, **40**, 20–26.
- 30 Y. Gao, R. Zhu, Z. Wang, F. Guo, Z. Wei, Y. Yang, L. Zhao and Y. Zhang, *ACS Appl. Energy Mater.*, 2018, **1**, 1888–1892.
- 31 Y. Qin, M. A. Uddin, Y. Chen, B. Jang, K. Zhao, Z. Zheng, R. Yu, T. J. Shin, H. Y. Woo

- and J. Hou, *Adv. Mater.*, 2016, **28**, 9416–9422.
- 32 Y. Li, D. Liu, J. Wang, Z. G. Zhang, Y. Li, Y. Liu, T. Zhu, X. Bao, M. Sun and R. Yang, *Chem. Mater.*, 2017, **29**, 8249–8257.
- 33 X. Bao, Y. Zhang, J. Wang, D. Zhu, C. Yang, Y. Li, C. Yang, J. Xu and R. Yang, *Chem. Mater.*, 2017, **29**, 6766–6771.
- 34 D. Xia, Y. Wu, Q. Wang, A. Zhang, C. Li, Y. Lin, F. J. M. Colberts, J. J. Van Franeker, R. A. J. Janssen, X. Zhan, W. Hu, Z. Tang, W. Ma and W. Li, *Macromolecules*, 2016, **49**, 6445–6454.
- 35 S. Xu, L. Feng, J. Yuan, Z. G. Zhang, Y. Li, H. Peng and Y. Zou, *ACS Appl. Mater. Interfaces*, 2017, **9**, 18816–18825.
- 36 H. Wang, P. Chao, H. Chen, Z. Mu, W. Chen and F. He, *ACS Energy Lett.*, 2017, **2**, 1971–1977.
- 37 Y. Wang, Q. Fan, X. Guo, W. Li, B. Guo, W. Su, X. Ou and M. Zhang, *J. Mater. Chem. A*, 2017, **5**, 22180–22185.
- 38 Z. Liu, D. Liu, K. Zhang, T. Zhu, Y. Zhong, F. Li, Y. Li, M. Sun and R. Yang, *J. Mater. Chem. A*, 2017, **5**, 21650–21657.
- 39 S. Wen, W. Chen, G. Huang, W. Shen, H. Liu, L. Duan, J. Zhang and R. Yang, *J. Mater. Chem. C*, 2018, **6**, 1753–1758.
- 40 T. Yu, X. Xu, G. Zhang, J. Wan, Y. Li and Q. Peng, *Adv. Funct. Mater.*, 2017, **27**, 1–11.
- 41 G. Zhang, X. Xu, Z. Bi, W. Ma, D. Tang, Y. Li and Q. Peng, *Adv. Funct. Mater.*, 2018, **28**, 1–15.
- 42 X. Xu, T. Yu, Z. Bi, W. Ma, Y. Li and Q. Peng, *Adv. Mater.*, 2018, **30**, 1–8.
- 43 M. H. Hoang, G. E. Park, D. L. Phan, T. T. Ngo, T. Van Nguyen, S. H. Park, M. J. Cho and D. H. Choi, *J. Polym. Sci. Part A Polym. Chem.*, 2018, **56**, 1528–1535.
- 44 Z. Liao, Y. Wang, Y. An, Y. Tan, X. Meng, F. Wu, L. Chen and Y. Chen, *Macromol. Rapid Commun.*, 2018, **39**, 1–7.
- 45 M. An, F. Xie, X. Geng, J. Zhang, J. Jiang, Z. Lei, D. He, Z. Xiao and L. Ding, *Adv. Energy Mater.*, 2017, **7**, 2–7.
- 46 D. Liu, J. Wang, C. Gu, Y. Li, X. Bao and R. Yang, *Adv. Mater.*, 2018, **30**, 1–9.
- 47 G. E. Park, S. Choi, S. Y. Park, D. H. Lee, M. J. Cho and D. H. Choi, *Adv. Energy Mater.*, 2017, **7**, 1–10.



- 48 P. Zhu, B. Fan, X. Du, X. Tang, N. Li, F. Liu, L. Ying, Z. Li, W. Zhong, C. J. Brabec, F. Huang and Y. Cao, *ACS Appl. Mater. Interfaces*, 2018, **10**, 22495–22503.
- 49 W. Li, J. Cai, Y. Yan, F. Cai, S. Li, R. S. Gurney, D. Liu, J. D. McGettrick, T. M. Watson, Z. Li, A. J. Pearson, D. G. Lidzey, J. Hou and T. Wang, *Sol. RRL*, 2018, **2**, 1–10.
- 50 Z. Shi, H. Liu, Y. Wang, J. Li, Y. Bai, F. Wang, X. Bian, T. Hayat, A. Alsaedi and Z. Tan, *ACS Appl. Mater. Interfaces*, 2017, **9**, 43871–43879.
- 51 H. Zhang, S. Li, B. Xu, H. Yao, B. Yang and J. Hou, *J. Mater. Chem. A*, 2016, **4**, 18043–18049.
- 52 R. Li, G. Liu, R. Xie, Z. Wang, X. Yang, K. An, W. Zhong, X. F. Jiang, L. Ying, F. Huang and Y. Cao, *J. Mater. Chem. C*, 2018, **6**, 7046–7053.
- 53 S. Li, L. Ye, W. Zhao, S. Zhang, H. Ade and J. Hou, *Adv. Energy Mater.*, 2017, **7**, 1–10.
- 54 Z. Li, D. Yang, T. Zhang, J. Zhang, X. Zhao and X. Yang, *Small*, 2018, **14**, 1–8.
- 55 W. Zhao, S. Li, H. Yao, S. Zhang, Y. Zhang, B. Yang and J. Hou, *J. Am. Chem. Soc.*, 2017, **139**, 7148–7151.
- 56 L. Ye, S. Li, X. Liu, S. Zhang, M. Ghasemi, Y. Xiong, J. Hou and H. Ade, *Joule*, 2019, **3**, 443–458.
- 57 L. Yang, S. Zhang, C. He, J. Zhang, Y. Yang, J. Zhu, Y. Cui, W. Zhao, H. Zhang, Y. Zhang, Z. Wei and J. Hou, *Chem. Mater.*, 2018, **30**, 2129–2134.
- 58 Q. Fan, Q. Zhu, Z. Xu, W. Su, J. Chen, J. Wu, X. Guo, W. Ma, M. Zhang and Y. Li, *Nano Energy*, 2018, **48**, 413–420.
- 59 S. Li, L. Ye, W. Zhao, H. Yan, B. Yang, D. Liu, W. Li, H. Ade and J. Hou, *J. Am. Chem. Soc.*, 2018, **140**, 7159–7167.
- 60 B. Gao, H. Yao, J. Hou, R. Yu, L. Hong, Y. Xu and J. Hou, *J. Mater. Chem. A*, 2018, **6**, 23644–23649.
- 61 S. Li, L. Ye, W. Zhao, X. Liu, J. Zhu, H. Ade and J. Hou, *Adv. Mater.*, 2017, **29**, 1–7.
- 62 D. Liu, B. Yang, B. Jang, B. Xu, S. Zhang, C. He, H. Y. Woo and J. Hou, *Energy Environ. Sci.*, 2017, **10**, 546–551.
- 63 S. Dai, F. Zhao, Q. Zhang, T. K. Lau, T. Li, K. Liu, Q. Ling, C. Wang, X. Lu, W. You and X. Zhan, *J. Am. Chem. Soc.*, 2017, **139**, 1336–1343.
- 64 S. Jung, J. Oh, U. J. Yang, S. M. Lee, J. Lee, M. Jeong, Y. Cho, S. Kim, J. M. Baik and C. Yang, *Nano Energy*, 2020, **77**, 105271.

- 65 J. Zhao, Y. Li, H. Lin, Y. Liu, K. Jiang, C. Mu, T. Ma, J. Y. Lin Lai, H. Hu, D. Yu and H. Yan, *Energy Environ. Sci.*, 2015, **8**, 520–525.
- 66 B. Fan, L. Ying, Z. Wang, B. He, X. F. Jiang, F. Huang and Y. Cao, *Energy Environ. Sci.*, 2017, **10**, 1243–1251.
- 67 Y. Lin, F. Zhao, Q. He, L. Huo, Y. Wu, T. C. Parker, W. Ma, Y. Sun, C. Wang, D. Zhu, A. J. Heeger, S. R. Marder and X. Zhan, *J. Am. Chem. Soc.*, 2016, **138**, 4955–4961.
- 68 D. Baran, R. S. Ashraf, D. A. Hanifi, M. Abdelsamie, N. Gasparini, J. A. Röhr, S. Holliday, A. Wadsworth, S. Lockett, M. Neophytou, C. J. M. Emmott, J. Nelson, C. J. Brabec, A. Amassian, A. Salleo, T. Kirchartz, J. R. Durrant and I. McCulloch, *Nat. Mater.*, 2017, **16**, 363–369.
- 69 Y. Lin, J. Wang, Z. G. Zhang, H. Bai, Y. Li, D. Zhu and X. Zhan, *Adv. Mater.*, 2015, **27**, 1294–1299.
- 70 J. Lee, S. J. Ko, H. Lee, J. Huang, Z. Zhu, M. Seifrid, J. Vollbrecht, V. V. Brus, A. Karki, H. Wang, K. Cho, T. Q. Nguyen and G. C. Bazan, *ACS Energy Lett.*, 2019, **4**, 1401–1409.
- 71 Y. Zhang, H. Yao, S. Zhang, Y. Qin, J. Zhang, L. Yang, W. Li, Z. Wei, F. Gao and J. Hou, *Sci. China Chem.*, 2018, **61**, 1328–1337.
- 72 J. Yuan, Y. Zhang, L. Zhou, G. Zhang, H. L. Yip, T. K. Lau, X. Lu, C. Zhu, H. Peng, P. A. Johnson, M. Leclerc, Y. Cao, J. Ulanski, Y. Li and Y. Zou, *Joule*, 2019, **3**, 1140–1151.
- 73 J. Lee, H. Cha, H. Yao, J. Hou, Y. H. Suh, S. Jeong, K. Lee and J. R. Durrant, *ACS Appl. Mater. Interfaces*, 2020, **12**, 32764–32770.
- 74 X. Song, N. Gasparini, L. Ye, H. Yao, J. Hou, H. Ade and D. Baran, *ACS Energy Lett.*, 2018, **3**, 669–676.
- 75 L. Ye, Y. Xiong, Q. Zhang, S. Li, C. Wang, Z. Jiang, J. Hou, W. You and H. Ade, *Adv. Mater.*, 2018, **30**, 1705485.
- 76 J. Kalowekamo and E. Baker, *Sol. Energy*, 2009, **83**, 1224–1231.
- 77 Z. Song, C. L. McElvany, A. B. Phillips, I. Celik, P. W. Krantz, S. C. Watthage, G. K. Liyanage, D. Apul and M. J. Heben, *Energy Environ. Sci.*, 2017, **10**, 1297–1305.
- 78 N. Sommerfeldt and H. Madani, *Renewable and Sustainable Energy Reviews*, 2017, **74**, 1394–1404.
- 79 A. Gambhir, P. Sandwell and J. Nelson, *Sol. Energy Mater. Sol. Cells*, 2016, **156**, 49–58.
- 80 R. Jones-Albertus, D. Feldman, R. Fu, K. Horowitz and M. Woodhouse, *Prog.*

- Photovoltaics Res. Appl.*, 2016, **24**, 1272–1283.
- 81 W. Yang, W. Wang, Y. Wang, R. Sun, J. Guo, H. Li, M. Shi, J. Guo, Y. Wu, T. Wang, G. Lu, C. J. Brabec, Y. Li and J. Min, *Joule*, 2021, **5**, 1209–1230.
- 82 J. A. Hollingsworth, E. Ravishankar, B. O’Connor, J. X. Johnson and J. F. DeCarolis, *J. Ind. Ecol.*, 2020, **24**, 234–247.
- 83 T. Boulard, C. Raepfel, R. Brun, F. Lecompte, F. Hayer and G. Carmassi. *Agron Sustain Dev.*, 2011, **31**, 757–777.
- 84 T.R. Andersen, F. Zhao, Y. Li, M. Dickinson and H. Chen. *Solar RRL*, 2020, **4**, 1-9.
- 85 The world bank - price of electricity,  
[https://govdata360.worldbank.org/indicators/h6779690b?country=BRA&indicator=42573&viz=line\\_chart&years=2014,2019](https://govdata360.worldbank.org/indicators/h6779690b?country=BRA&indicator=42573&viz=line_chart&years=2014,2019).
- 86 EIA, <https://www.eia.gov/electricity/data/browser/#/topic/7?agg=2,0,1&geo=g&freq=M> .
- 87 Ohio state university: Hydroponic crop program - economic budgets,  
<https://u.osu.edu/greenhouse/hydroponic-crop-program-economic-budgets/>.
- 88 P. Fisher and E. Runkle, *Lighting up profits: Understanding greenhouse lighting*, Meister Media Worldwide, 2004.
- 89 Y. Rouphael and G. Colla, *Eur. J. Agron.*, 2005, **23**, 183–194.
- 90 K. Murakami, N. Fukuoska and S. Noto, *Sci. Hortic.*, 2017, **218**, 1–7.
- 91 T. Mizuno, W. Amaki and H. Watanabe, *Acta Hortic.*, 2011, **907**, 179–184.
- 92 M. Cossu, A. Yano, S. Solinas, P. A. Deligios, M. T. Tiloca, A. Cossu and L. Ledda, *Eur. J. Agron.*, 2020, **118**, 126074.
- 93 S. Uzun, *New Zeal. J. Crop Hortic. Sci.*, 2007, **35**, 51–59.
